# Supplementary material for: Exploring the components of physician volunteer engagement: a qualitative investigation of a national Canadian simulation-based training programme
Source: PubMed Central journal article supplement — BMJ Open. 2017 Jun 23;7(6):e014303. doi: 10.1136/bmjopen-2016-014303 (PMC5541596; doi:10.1136/bmjopen-2016-014303), 2017-06-23
Supplement: bmjopen-2016-014303.draft_revisions.pdf [file bmjopen-2016-014303.draft_revisions.pdf]

# BMJ Open

## Volunteer physician engagement: an investigation of a national simulation based training program

|                                 |                                                                                                                                                                                                                                                                                                                                                                                                                                                                                         |
|---------------------------------|-----------------------------------------------------------------------------------------------------------------------------------------------------------------------------------------------------------------------------------------------------------------------------------------------------------------------------------------------------------------------------------------------------------------------------------------------------------------------------------------|
| Journal:                        | <i>BMJ Open</i>                                                                                                                                                                                                                                                                                                                                                                                                                                                                         |
| Manuscript ID                   | bmjopen-2016-014303                                                                                                                                                                                                                                                                                                                                                                                                                                                                     |
| Article Type:                   | Research                                                                                                                                                                                                                                                                                                                                                                                                                                                                                |
| Date Submitted by the Author:   | 14-Sep-2016                                                                                                                                                                                                                                                                                                                                                                                                                                                                             |
| Complete List of Authors:       | Sarti, Aimee J.; Ottawa Hosp, Critical Care<br>Sutherland, Stephanie; Ottawa Hosp, Critical Care<br>Landriault, Angele; Royal College of Physicians and Surgeons of Canada (RCPSC), Practice, Performance and Innovation (PPI) unit<br>DesRosier, Kirk; Royal College of Physicians and Surgeons of Canada (RCPSC), Practice, Performance and Innovation (PPI) unit<br>Brien, Susan; Royal College of Physicians and Surgeons of Canada<br>Cardinal, Pierre; Ottawa Hosp, Critical Care |
| <b>Primary Subject Heading</b>: | Medical education and training                                                                                                                                                                                                                                                                                                                                                                                                                                                          |
| Secondary Subject Heading:      | Intensive care, Qualitative research                                                                                                                                                                                                                                                                                                                                                                                                                                                    |
| Keywords:                       | Physicians, Volunteers, QUALITATIVE RESEARCH, MEDICAL EDUCATION & TRAINING                                                                                                                                                                                                                                                                                                                                                                                                              |
|                                 |                                                                                                                                                                                                                                                                                                                                                                                                                                                                                         |

SCHOLARONE™  
Manuscripts

## Volunteer physician engagement: an investigation of a national simulation based training program

Sarti, Aimee J. MD; Sutherland, Stephanie PhD; Landriault, Angele BScN; DesRosier, Kirk; Brien, Susan MD, MEd; Cardinal, Pierre MD, MScEpi

### **Affiliations:**

Dr. Sarti is a clinical scholar, The Ottawa Hospital, Department of Medicine, Division of Critical Care; research collaborator with The Royal College of Physicians and Surgeons of Canada (RCPSC); Practice, Performance and Innovation (PPI) unit;

Dr. Sutherland is an educational research consultant with expertise in research methodology and program evaluation, Department of Innovation in Medical Education, University of Ottawa (DIME), Ontario, Canada.

Ms. Landriault manager for the Royal College of Physicians and Surgeons of Canada (RCPSC), Practice, Performance and Innovation (PPI) unit, Ottawa, Ontario, Canada.

Mr. DesRosier is an instructional designer and evaluator for the Royal College of Physicians and Surgeons of Canada (RCPSC), Practice, Performance and Innovation (PPI) unit, Ottawa, Ontario, Canada.

Dr. Brien is the Director of Practice and Systems Innovation and Practice, Performance and Innovation, as well as VP Asia Pacific with Royal College International (RCI), at the Royal College of Physicians and Surgeons of Canada (RCPSC).

Dr. Cardinal is professor, the University of Ottawa, Department of Medicine, Division of Critical Care; Senior clinical scholar, The Royal College of Physicians and Surgeons of Canada (RCPSC); Practice, Performance and Innovation (PPI) unit, Ottawa, Ontario, Canada.

### **Corresponding Author:**

Aimee Sarti MD

The Royal College of Physicians and Surgeons of Canada (RCPSC), Practice, Performance and Innovation (PPI) Unit

774 Echo Drive, Ottawa, Ontario, Canada, K1S 5N8

Telephone – 613-730-8177 ext 599

Fax – 613-730-2410

Email – [asarti@toh.on.ca](mailto:asarti@toh.on.ca)

**Key Words:** volunteer, engagement, qualitative research, medical education, critical care

## Abstract

**Objectives:** Conceptual clarity on physician volunteer engagement is lacking in the medical literature. The aim of this study was to present a conceptual framework to describe the elements which influence physician volunteer engagement and to explore volunteer engagement within a national educational program.

**Setting:** The context for this study was the Acute Critical Events Simulation (ACES) program in Canada, which has successfully evolved into a national educational program, driven by physician volunteers.

**Method:** A conceptual framework was constructed based on an extensive literature review and expert consultation. Secondary qualitative analysis was undertaken on fifteen semi-structured interviews conducted from 2012 to 2014 with participants, including program directors and health care professionals across Canada. An additional fifteen interviews were conducted to achieve thematic saturation. Data was analyzed iteratively and inductive coding techniques applied.

**Results:** From 2010 to 2014 the program recruited 73 volunteer health care professionals who contributed to the creation of educational materials and/or served as instructors. The majority were physicians. From the physician volunteer data, eleven themes emerged. The most prominent themes included volunteer recruitment, retention, exchange, recognition, educator network, and quasi volunteerism. Captured within these interrelated themes were the framework elements, including the synergistic effects of emotional, cognitive and reciprocal engagement. Behavioural engagement was driven by these factors along with a cue to action, which led to contributions to the ACES program.

**Conclusion:** This investigation provides a preliminary framework and supportive evidence towards understanding the complex construct of physician volunteer engagement. The need for this research is particularly important in present day, where growing fiscal constraints create challenges for medical education to do more with less.

## **Article Summary**

### **Strengths and limitations of this study**

- First study to synthesize key elements of physician volunteer engagement into a conceptual framework.
- Covers an issue little investigated and draws upon a wider theoretical background.
- Qualitative data obtained provides new insights into physician volunteer engagement, which may be useful in practically improving volunteer engagement strategies.
- Our findings were obtained in one country, within one national program.
- Explored volunteer engagement in a highly engaged group of physicians, study was not able to explore disengagement.

## Introduction

Physician volunteers are essential to health care delivery and medical education.<sup>1</sup>

Despite the growing needs to optimize volunteer physician engagement, there is a paucity of data on how to improve and maintain engagement. Volunteerism can be defined as any altruistic act, which is undertaken without financial gain while engagement has been defined as being “actively committed” or “to involve oneself or become occupied; to participate.”<sup>2,3</sup>

Physicians appear to highly value their role as volunteers. In a US study by Gruen et al., 95 % of physicians surveyed rated community participation as important”.<sup>4</sup> Yet, in a national survey of 319 physicians, only 39% participated in volunteer activities.<sup>5</sup>

Therefore, there appears to be a wide gap between the perceived importance of volunteering and its translation into action or engagement. Such studies illustrate the need to better understand the determinants of physician volunteer engagement and the ways in which it can be optimized.

Most of the medical literature on engagement is centered on the patient and behaviors that promote health. A few isolated studies focusing on physician engagement were located but there is currently no accepted model describing the multifaceted dimensions of physician volunteer engagement.<sup>6-10</sup> We can draw from the social science literature in order to define and examine the various components of engagement.

1  
2  
3 The concept of engagement, specifically, school engagement has been synthesized in a  
4 review by Fredricks et al.<sup>11</sup> They present engagement as a multifaceted construct  
5 including three dynamically interrelated components: behavioural, emotional and  
6 cognitive engagement. Behavioural engagement is related specifically to the on task  
7 behavior. Emotional engagement is related to the value of the tasks as determined by the  
8 individual. Value is further divided into 4 components: “interest (enjoyment of the task),  
9 attainment value (importance of doing well on the task for confirming aspects of one’s  
10 self-schema), utility value (importance of the task for future goals), and cost (negative  
11 aspects of engaging in the task).”<sup>11</sup> Cognitive engagement refers to an individual’s  
12 motivational goals and self-regulated learning. This concept can be further described as a  
13 psychological investment in learning, understanding, and mastering knowledge or skills  
14 with a “desire to go beyond the requirements, and a preference for challenge.”<sup>11</sup>  
15  
16  
17  
18  
19  
20  
21  
22  
23  
24  
25  
26  
27  
28  
29  
30  
31  
32  
33

34 In this study, we sought to develop a conceptual framework to describe and explore the  
35 components and theoretical underpinnings of physician volunteer engagement. We  
36 began our investigation with a secondary analysis of a comprehensive needs assessment  
37 in a quality improvement initiative aimed at the overall enhancement of the Acute  
38 Critical Events Simulation (ACES) program. Later, we extended this initial work by  
39 obtaining additional data to provide evidence towards understanding the complex  
40 construct of physician volunteer engagement.  
41  
42  
43  
44  
45  
46  
47  
48  
49  
50  
51  
52

### 53 **Context**

54  
55  
56  
57  
58  
59  
60

1  
2  
3 The ACES Program is a national educational program aimed at improving the proficiency  
4 of individuals and teams involved in the early management of critically ill patients.  
5

6  
7  
8 Nurses, respiratory therapists, and physicians who are the first to respond to a patient in  
9 crisis come from various disciplines and practice in diverse milieus. Their experience  
10 managing acutely ill patients is often very limited given the low incidence of critical  
11 illness. Yet, clinical studies indicate that early recognition and management are most  
12 effective in lowering both morbidity and mortality. Randomized controlled trials and  
13 guidelines emphasize the importance of the 'golden-hour' in patients with conditions such  
14 as myocardial infarction, stroke, and sepsis.<sup>12-16</sup> The ACES program includes various  
15 simulation modalities delivered online or face-to-face as well as books and didactic  
16 material. It also includes instructor certification courses. Most of the educational  
17 materials have been customized to meet the needs of different groups of learners.  
18  
19  
20  
21  
22  
23  
24  
25  
26  
27  
28  
29  
30  
31  
32  
33

34 This program was initially developed from the vision and efforts of a small collective of  
35 Canadian critical care physicians who volunteered their time and expertise. It has  
36 successfully evolved into a national educational program, has been acquired by the Royal  
37 College of Physicians and Surgeons of Canada (RCPSC), and continues to advance and  
38 grow. Volunteers remain fundamental to the ACES program. They create materials,  
39 organize courses, teach, and conduct research. From 2010 to 2014 the program recruited  
40 a total of 73 volunteers, 69 of whom were physicians. The need for volunteers is  
41 increasing due to increasing demand, addition of new forms of simulation, growth of  
42 online curriculum and anticipated movement to a competency-based program.  
43  
44  
45  
46  
47  
48  
49  
50  
51  
52  
53  
54  
55  
56  
57  
58  
59  
60

## Method

A conceptual framework was constructed; data collection instruments were selected and developed based on this model; qualitative data collection was performed and analyzed iteratively.

### Conceptual Framework

A conceptual framework is meant to explain the key factors, constructs, or variables, and their presumed relationships.<sup>17,18</sup> An extensive literature review along with expert consultation informed the development of the framework. We developed the model depicted in Figure 1, to explore volunteer physician engagement in a comprehensive manner. For our study, the physician behavior of participation as a volunteer is the dependent variable. All other elements, which contribute and lead to this behavior, are the independent variables under investigation. In this figure, we have depicted two physicians and one leader for simplicity. In reality there may be many leaders and physicians. We define a leader as an individual within the group who influences others towards a mutual purpose or common goal. We define an individual's engagement as a multidimensional construct including emotional and cognitive engagement which ultimately can lead to behavioral engagement, with tasks directed toward contributing to organizational development and/or a specific domain, such as education, quality and safety, etc.

<Insert Figure 1 about here>



1  
2  
3 An individual's overall engagement is impacted by their demographic and psychosocial  
4 characteristics. The emotional and cognitive components drive behavior. The  
5  
6 bidirectional arrows between these components indicates that the presence and/or  
7  
8 development of one component may impact the other. The behavior itself may further  
9  
10 promote the emotional and cognitive components and enhance volunteer behaviors  
11  
12 (indicated by the arrow back to the emotional and cognitive components). In addition,  
13  
14 the behavior requires a "cue to action" or trigger (which can be either intrinsic or  
15  
16 extrinsic to the individual). A simplistic example of an extrinsic "cue to action" may  
17  
18 involve the director of the program contacting a volunteer to participate.  
19  
20  
21  
22  
23  
24

25  
26  
27 Individual volunteers have the potential to impact each other and synergistically enhance  
28  
29 engagement of each other. We have termed this variable "reciprocal engagement." This  
30  
31 is akin to mutual engagement involving not only individual actions/attributes but also the  
32  
33 actions/attributes of others.<sup>19</sup> This relationship and enhanced engagement potential is  
34  
35 likely secondary to the impact on the individuals' emotional, cognitive and behavioral  
36  
37 components and/or may provide a trigger leading to the behavior.  
38  
39  
40  
41  
42

43  
44 Leaders have their own intrinsic characteristics, emotional and cognitive components  
45  
46 which drive the behavior. Reciprocal engagement may also synergistically increase the  
47  
48 engagement of both the leader and individuals.  
49  
50

51  
52  
53 Ultimately, the behavioral engagement of the individual volunteers can lead to increased  
54  
55 organizational performance.<sup>20</sup> Sustainability of the volunteers likely depends on these  
56  
57  
58  
59  
60

1  
2  
3 factors being maintained and may fluctuate for an individual over time with periods of  
4  
5 greater and lesser engagement, for example based on the presence or absence of a “cue to  
6  
7 action” and also based on changes in organizational culture, leadership and other  
8  
9 individuals.  
10  
11

### 12 13 14 15 **Data Collection and Analysis**

16  
17 Interviews were conducted between October 2012 to August 2015. Participant selection  
18  
19 was carried out using maximum variation purposive sampling to identify individuals that  
20  
21 would provide a balanced representation.<sup>21-23</sup> Participants included program directors  
22  
23 from different specialties and health care professionals from different backgrounds.  
24  
25

26  
27 Semi-structured interview guides were designed to follow a broad, pre-determined line of  
28  
29 inquiry that was flexible and that could evolve as data collection unfolded, permitting  
30  
31 exploration of emerging themes. Interview guides were created by an interdisciplinary  
32  
33 team of investigators with expertise in medical education, simulation, sociological and  
34  
35 qualitative research methods. Interviews lasted from forty-five to sixty minutes, were  
36  
37 audio-recorded, and transcribed verbatim. (See Appendix S1, online for interview  
38  
39 guides).  
40  
41  
42  
43  
44

45  
46 Qualitative data analysis of the comprehensive data set included the application of  
47  
48 inductive coding techniques and the use of the NVIVO software for data  
49  
50 management.<sup>21,24</sup> The research team followed Creswell’s coding process where data is  
51  
52 first explored to gain a general sense of the data and then coded. These codes were  
53  
54 described and collapsed into themes.<sup>21</sup> The analysis team consisted of 3 researchers who  
55  
56  
57  
58  
59  
60

1  
2  
3 participated in coding training and meetings to develop the codebook. The three  
4  
5 researchers generated codes (from the same interview transcripts) independently. Then,  
6  
7 they engaged in consensus discussions. Inter-rater reliability, assessed prior to  
8  
9 independent coding, demonstrated a 95.73% agreement and a 0.75 Kappa score which is  
10  
11 considered to be substantial agreement.<sup>25</sup> The volunteer construct was further explored  
12  
13 and coded, through a more focused analytic approach in order to gain an in-depth  
14  
15 understanding of volunteer engagement.<sup>26</sup> In an iterative process, additional interviews  
16  
17 were performed to reach saturation of the subthemes specific to volunteer engagement.  
18  
19 This study was granted an official exemption by The Ottawa Hospital Research Ethics  
20  
21 Board.  
22  
23  
24  
25  
26  
27  
28  
29

## 30 Results

31  
32 For the larger study (quality improvement initiative of the ACES program) 15 interviews  
33  
34 were performed to gain a broad and comprehensive understanding of the ACES program,  
35  
36 which included program directors and health care professionals across Canada;  
37  
38 physicians (n=11), nurses (n=2) and RTs (n=2) (interview guide 1). Upon analysis of this  
39  
40 interview data the 'physician as volunteer' theme was identified. To further explore this  
41  
42 finding, and achieve thematic saturation (qualitative) we performed an additional 15  
43  
44 interviews of physician volunteers (interview guide 2). Overall, thirty of thirty-three  
45  
46 invited individuals agreed to participate in the semi-structured interviews for a response  
47  
48 rate of 91%. All physician volunteers that were interviewed were full time clinicians and  
49  
50 members part of the ACES faculty, who are called to participate as needed. Participants  
51  
52 are displayed in Table 1.  
53  
54  
55  
56  
57  
58  
59  
60

1  
2  
3  
4  
5  
6 <Insert Table 1 about here>  
7  
8  
9

10 To gain an in-depth understanding of the phenomenon of volunteer engagement, the data  
11 set was coded and 11 themes were identified and sub-coded. Of these themes, six  
12 interrelated themes – volunteer recruitment, volunteer retention, volunteer exchange,  
13 volunteer recognition, educator network, and quasi-volunteerism were most prominent in  
14 our data. A summary of the qualitative findings is presented in Table 2. Prototypical  
15 quotes are provided to elucidate each theme.  
16  
17  
18  
19  
20  
21  
22  
23  
24  
25  
26

27 <Insert Table 2 about here>  
28  
29  
30  
31

### 32 **Volunteer Recruitment**

33  
34 **Word of Mouth.** All recruitment was accomplished through word of mouth. That is, the  
35 cue to action was uniformly described by volunteers as an informal interaction with  
36 another volunteer, usually a leader who would call the volunteers to request their  
37 involvement.  
38  
39  
40  
41  
42

43 I just got a call from him [ACES Director] one day, he introduced himself and  
44 talked about this program where a few guys were getting together and trying to do  
45 this thing and at that time there were, I don't know, about 6 or 7 guys and he  
46 asked if I wanted to be part of it.  
47  
48

49 **Snowball Approach.** A snowball approach was described by participants as a means of  
50 identifying and recruiting high quality volunteers.  
51  
52

53  
54 What I would do is have more than one person get in touch with the person they  
55 are trying to recruit. First of all you want to cherry pick the people you want to  
56 recruit. It's just like a draft in sports or something. You want to cherry pick the  
57  
58  
59  
60

1  
2  
3 people you want on your team and once you've earmarked certain people and say,  
4 "this person is not just strong clinically but also has great personal skills, is  
5 humble enough to listen to feedback, and to not get offended by it but to work  
6 with it."  
7

8  
9 **Career Stage.** Participants explored the different career stages of physicians who are  
10 recruited to volunteer with the program and felt that younger physicians are generally  
11  
12 easier to recruit.  
13  
14

15  
16 If it was in the middle part of their [physician] career, they may be on a certain  
17 track and it's difficult to engage them. I think it would be great if we could  
18 recruit people at mid-career because they have a bit more experience, a bit more  
19 knowledge about how things should work or how things should flow. On the  
20 other hand, if you recruit younger people, I think they are more enthusiastic and  
21 have completely new ideas and that's not a bad thing either right? For me, it was  
22 great to be involved early on but I was definitely a little shy to come forward with  
23 suggestions initially because, yeah, it's just a very established crowd.  
24  
25

26  
27 **Barriers.** The main barriers to recruitment included career trajectory (as described  
28 above) and individual time constraints, including both personal and professional  
29 demands. These barriers also pertained to the retention of volunteers. As volunteer  
30 physicians continue along their career they may choose different pursuits (e.g., research)  
31 and then do not have time to remain an ACES volunteer.  
32  
33  
34  
35  
36  
37  
38  
39  
40

#### 41 **Volunteer Retention**

42  
43 **Distributed Leadership and Career Paths.** The organization embraces an open culture  
44 creating a collaborative environment, which allows for new leaders to be brought in and  
45 mentored by long standing leaders. This relationship enables long-standing leaders to  
46 remain involved with the program while balancing other career demands. In this way,  
47  
48 ACES is able to deepen its leadership base by distributing responsibilities to others.  
49  
50  
51  
52

53  
54  
55 I have decreased in participation, though I still remain section chair, well it is  
56 more of a co-chair position because I have a capable colleague who has taken  
57  
58  
59  
60

1  
2  
3  
4 over some of the curriculum development...I don't see myself in this role for  
5 perpetuity and so it's a good opportunity for people to transition and I think it's  
6 part of the natural transition process. I still remain involved and committed to  
7 being part of the National ACES Program and I still assist locally but I have  
8 decreased my involvement. It is more of a career choice and balancing the  
9 different aspects of my career that I've taken on as well.  
10

11 **Program Change and Evolution.** The program's continual growth, ongoing  
12 modifications and innovative nature were described by volunteers as being very  
13 intellectually stimulating. This cognitive component was described by many participants  
14 as a major contributor to their initial and ongoing commitment and involvement with the  
15 program.  
16  
17  
18  
19  
20  
21  
22

23 I think the fact that we change and we grow is very important. If it was just the  
24 same program every year it will eventually become stagnant and people will lose  
25 interest.  
26  
27

28 **Comfort Zone.** Comfort zone is indicative of a behavioral state within which a person  
29 operates in an 'anxiety neutral' condition. The objective is to push or lead individuals  
30 beyond their comfort zone until comfort is achieved, which enables a consistent high-  
31 level performance.<sup>27,28</sup> During their interviews volunteers were asked if they felt they  
32 were drawn to more challenging tasks. One physician put it like this,  
33  
34  
35  
36  
37  
38  
39

40 So, why is it that you have to get out of your comfort zone? Why do you have to  
41 embark on a new mission or path that is quite challenging, one that there is no  
42 guarantee that it is going to work? I actually enjoy the process. I love working  
43 with others, I love creating things, and I love taking something that's just in the  
44 idea stage, and you know transforming it into something that's actually real.  
45  
46

47 **Reciprocal Engagement.** Participants identified that a volunteer can enhance another  
48 volunteer's engagement and this process is cyclical. Participants further identified that  
49 interacting and connecting with students further enhanced their overall engagement.  
50  
51  
52  
53

54 It's amazing to go [to the ACES course] and see all these people giving their time  
55 because they love to teach and want people to do better. They are genuinely  
56 interested in the well-being of these fellows to be better doctors and it's catching  
57  
58  
59  
60

1  
2  
3 you can't help but get your love of education back.  
4  
5

6 When you see other people grow, you grow with it. You grow in parallel,  
7 and in fact, it helps you become a better person. It's wonderful to see  
8 someone when they start young with enthusiasm, intelligence. These  
9 things are the raw materials, you know. And, this person blossoms  
10 and becomes a great researcher, and someone who has a great  
11 future...that is an incredible reward and it motivates you.  
12  
13

14 **Intrinsic Motivation.** We use the psychological lens of motivation to underpin our  
15 understanding of intrinsic motivation. There is a fundamental distinction between actions  
16 that are self-determined and those that are controlled.<sup>29,30</sup> The former, which reflects an  
17 individual's personal attributes and internal (intrinsic) motivation, was identified as  
18 contributing to the volunteers' participation in the program. The answer might be as  
19 simple as, 'I was built like that. This is who I am'. In fact, many described a strong  
20 internal drive to participate, hoping that they 'would be called' to action more frequently  
21 to perform tasks for the organization. One participant described his experience like  
22 sitting on the bench waiting for the coach to call:  
23  
24  
25  
26  
27  
28  
29  
30  
31  
32  
33  
34

35 I guess one of the biggest things as a volunteer, you're always somebody who is  
36 kind of on the bench and the coach may call you into play at any time. And, you  
37 kind of wonder if you're gonna get called off the bench to play...I love it and I  
38 love being invited back each time.  
39  
40

41 **Learners.** Fellows, often referred to as high-level learners by the volunteers, served as  
42 catalysts for both emotional and cognitive engagement in the ACES program. Some  
43 volunteers expressed the gratification they felt in teaching the next generation of  
44 intensivists, while others expressed the fulfillment in teaching such advanced learners:  
45  
46  
47  
48  
49

50 It's gratifying to feel like you are teaching the next generation of docs as they  
51 come through and they are high level learners who are about to become  
52 intensivists themselves so they are keen to learn.  
53  
54

55 I do enjoy interacting with the students, they are usually a pretty neat group of  
56 people. It's sort of the highest level of teaching you get to do. It's neat to have  
57  
58  
59  
60

1  
2  
3 such advanced learners to teach to.  
4  
5  
6

## 7 **Volunteer Exchange**

8  
9 **Career Opportunities.** We use volunteer exchange from the theory of social exchange  
10 which posits that social behavior is the result of an exchange process.<sup>31</sup> Volunteers noted  
11 that aside from receiving continuing medical education (CME) credit for their  
12 volunteerism, their participation in the ACES course provided additional benefits for their  
13 careers:  
14  
15  
16  
17  
18  
19

20  
21 Being an ACES volunteer means that this is Royal College (RC) accredited and I  
22 think that speaks a lot to the quality of the course but also for an academic person  
23 who might have additional interests in teaching more RC courses, this work  
24 stands out quite a bit.  
25  
26

27 **Keeping Current.** Volunteering in the ACES course gave individuals the benefit of  
28 staying current at a national level. This knowledge acquisition and networking  
29 opportunity both enhanced an individual's practice personally and professionally.  
30  
31  
32

33  
34 It's a good group of people, so it's always a good time and it's a way to keep your  
35 finger on the pulse of how things are going nationally and talk to people about  
36 what is going on in other centers.  
37  
38  
39

40 **Academic Currency.** The benefit of volunteering in the course was viewed by many  
41 individuals in terms of professional value whereby the experience counts towards  
42 promotion and tenure at an academic institution.  
43  
44  
45

46  
47 It's always something you can list in your own CV within our medical practice  
48 plan. Teaching at these things counts in terms of academic points, you can put  
49 down each year that you taught this and that has academic currency.  
50  
51

## 52 **Volunteer Recognition**

53  
54 **Personal Recognition.** Attainment value, such that involvement of volunteers with the  
55 program confirmed aspects of one's self "this is who I am," was further described in the  
56  
57  
58  
59  
60



1  
2  
3 form of personal recognition of their role as educators, by colleagues at other universities,  
4  
5 across the country.  
6

7  
8 **Scholarly/Academic Work.** Volunteers want their work in the ACES program to be  
9  
10 recognized as scholarly contributions. The ACES program leadership sends letters of  
11  
12 recognition to volunteers' department heads, however, participants described difficulty in  
13  
14 getting universities to recognize ACES contributions as scholarly.  
15  
16

17  
18 Our impression is that physicians from academic centers are willing to work...to  
19  
20 do quite a bit of work as a volunteer provided that their work is considered  
21  
22 scholarly work.

23  
24 I think ACES does a very good job at recognizing our contributions. They  
25  
26 catalogue and document the contributions on an annual basis, they send letters to  
27  
28 our Department heads so they recognize us. I think the greater impact is to have  
29  
30 an opportunity to enhance this recognition as scholarly work, to meet the criteria  
31  
32 for standard publication in a peer review outlet.

### 33 34 35 **Educator Network**

36  
37 **Common Vision.** Personal perceptions of the importance of the volunteer work coupled  
38  
39 with a common vision, passion for education and collaborative spirit was described by  
40  
41 participants. At the highest level the penultimate goal of potentially impacting patient  
42  
43 care as an outcome was described by both leaders and volunteers. The potential effect  
44  
45 on patient care (utility value) was further described as being achievable through the  
46  
47 volunteers' abilities and opportunity to help the residents acquire the knowledge and  
48  
49 skills required to excel in the clinical setting.

50  
51 I think we share a common vision, a common passion. We all believe in  
52  
53 education, I think that through collaboration we can do greater things than we  
54  
55 could independently. There's a sense of satisfaction of doing it.

56  
57 **Duration of Participation/Loyalty.** Participants expressed feelings of loyalty to other  
58  
59 volunteers in the network, especially those who have been involved for a longer duration.  
60

1  
2  
3 I think there's always going to be some loyalty because you've invested a great  
4 period of time. Also, it is one of the few tangible creations that you've helped  
5 develop and so you feel part of it.  
6  
7

8 **Affect.** Deep and meaningful emotional components connecting volunteers to the ACES  
9 program educator network were identified. Being part of a network elicited strong  
10 positive emotions. The enjoyment experienced by volunteers was strongly linked to  
11 interactions with other like-minded educators. The face-to-face interaction of volunteers  
12 on an annual basis at varying Canadian locations was described as an essential part of the  
13 organization.  
14  
15  
16  
17  
18  
19  
20  
21

22 You feed off the energy of the others, and they feed off your energy...it is a  
23 fantastic success component. There was one person who organized the initial  
24 think tank but he kind of tied the whole thing together...like molding clay into a  
25 form but the clay consisted of a whole bunch of people with lots of ideas...one of  
26 the key components has to be the involvement of people who love it and like to  
27 think outside the box because as soon as you do that, you have a recipe for  
28 success.  
29  
30  
31

32 Being a part of this network is intellectually very pleasing, it's emotionally  
33 rewarding. You end up feeling like you are part of this community. As a  
34 physician, you end up being a better physician because you are learning things  
35 from others that you can apply at the bedside.  
36  
37

38 When we meet it's like a bunch of friends getting together...everybody is full of  
39 energy when you arrive...everybody is happy, people are smiling...and you are  
40 basically like a big family...It's mostly, I think, emotional at that stage.  
41  
42

### 43 **Quasi Volunteerism**

44 **Academic Pressure.** The terms Quasi volunteer is reflected in both extrinsic and  
45 intrinsic motivations to extend effort into a relationship and/or activity. That is,  
46 volunteers in academic teaching hospitals described 'academic pressures', especially for  
47 younger doctors, where they felt they were required to meet specific academic  
48 expectations:  
49  
50  
51  
52  
53  
54  
55

56 The premise that its volunteerism is somewhat true. Nobody has a gun to my  
57  
58  
59  
60

1  
2  
3 head saying I have to do it but we all have to do something, academically. So, I  
4 guess it's quasi-volunteerism. Like if I wasn't doing this I would have to,  
5 especially us younger docs, like we are all on some degree of academic pressure  
6 to keep the university happy. So, if I were not doing this teaching, I'd be doing  
7 something else, you know?  
8  
9

10  
11 **Curriculum Vitae.** Intrinsically, participant volunteers used the teaching exposure at the  
12 national ACES course to grow their own CVs. As such, for some, the volunteer  
13 activities were not performed for purely altruistic reasons, but also for professional gain:  
14  
15

16  
17  
18 It's good to have in your career, you have to have exposure to teaching outside of  
19 your center so this gives me the opportunity to fulfill that, so it's not all altruistic.  
20 it's something that I do need to do for my curriculum vitae.  
21  
22

## 23 **Discussion**

24  
25  
26 The productivity, success, and sustainability of the ACES organization depends on the  
27 recruitment, retention and recognition of volunteers in a collaborative network. As  
28 depicted in our conceptual framework, the synergistic effects of the individual's  
29 emotional and cognitive engagement along with reciprocal engagement within the  
30 environmental context and culture of the organization, followed by a cue to action, leads  
31 to the volunteers behavioural engagement in volunteer activities. This behavioural  
32 engagement of the volunteers leads to the output of contribution to the ACES program.  
33  
34  
35  
36  
37  
38  
39  
40  
41  
42  
43  
44

45  
46 Our study yields several key findings that contribute to our understanding of what  
47 motivates physicians to volunteer, and perhaps more importantly what sustains their  
48 volunteerism. With respect to recruitment, we found that word-of-mouth recruitment was  
49 the primary vehicle to engage new members. In the marketing literature, word-of-mouth  
50 is defined as an interpersonal communication, independent of the organization's  
51 marketing activities, about an organization or its products.<sup>32</sup> Our findings support this  
52  
53  
54  
55  
56  
57  
58  
59  
60

1  
2  
3 literature in that word-of-mouth is a dyadic communication between a source and a  
4  
5 recipient.<sup>33</sup> This implies that the occurrence of word-of-mouth is determined by  
6  
7 characteristics of the recipient, the characteristics of the source, and their mutual  
8  
9 relationship.<sup>34,35</sup>  
10  
11

12  
13  
14  
15 Word-of-mouth communication was found to be particularly effective in securing buy-in  
16  
17 from new members when done early in the recruitment phase. That is, a phone call from  
18  
19 one of the long-standing members of ACES early in the selection phase was conducted so  
20  
21 as to “feel out” potential new members. This also tended to have the effect in attracting  
22  
23 the potential recruit. This supports earlier research that demonstrated that receiving  
24  
25 positive information through word-of-mouth early in the recruitment process is positively  
26  
27 related to perceived organizational attractiveness and actual recruitment.<sup>36</sup> Within the  
28  
29 business literature, this phenomenon is called the accessibility-diagnostics model. The  
30  
31 model suggests that information provided through word-of-mouth affects potential  
32  
33 recruits’ early evaluations of the organization because of its accessibility in memory and  
34  
35 its feedback potential.<sup>37,38</sup> That is, if a physician receives positive word-of-mouth  
36  
37 information on a given program or organization they are more likely to think favourably  
38  
39 when asked at a later date to perform a volunteer activity. This finding has clear practical  
40  
41 implications for practice in that organizations should try to stimulate positive word-of-  
42  
43 mouth early in the recruitment process because of its positive impact on potential recruits  
44  
45 attraction to an organization and subsequent retention.  
46  
47  
48  
49  
50  
51  
52  
53  
54  
55  
56  
57  
58  
59  
60

1  
2  
3 Long-standing ACES volunteers take careful measures to select, and subsequently recruit  
4 new members. In turn, this recruitment effort has a significant impact on long-term  
5 retention. The majority of physicians recruited become committed to the ACES program  
6 and have long-term sustainability as volunteers. We have found that a key to this  
7 commitment and sustainability lies in the embeddedness of the social networks among  
8 volunteer physicians. Research on teams in which dyads are found within larger groups  
9 of people (e.g., ACES volunteer physicians within the larger medical community)  
10 suggests that people are likely to collaborate with others who possess qualities and skills,  
11 and know-how that are complementary to their own and relevant to reaching a particular  
12 objective.<sup>39</sup> Interestingly, we found that many of the new recruits were already well  
13 known to at least several of the ACES physician volunteers, and thus were already in  
14 their educator network. This supports the notion that people are inclined to create  
15 relationships with friends of their friends (or the business associates of their business  
16 associates). The effect of sharing mutual acquaintances on attachment appears to be  
17 additive in that each additional mutual acquaintance shared by an unconnected dyad  
18 (relationship) additionally increased the likelihood that they will become acquainted.<sup>40</sup>  
19 Perhaps the reason for the excellent retention and deep commitment of ACES physician  
20 volunteers is explained by the structure of the ACES social networks which comprises  
21 many third party connections. Research states that ties connecting people who share  
22 several common third party connections are more likely to withstand the test of time.<sup>41,42</sup>  
23 As related to our conceptual framework, we understand that physician volunteers exercise  
24 both emotional (intrinsic commitment & loyalty) and cognitive (intellectual challenge &  
25 constant change/growth) engagement that directly relate to the retention of volunteers.  
26  
27  
28  
29  
30  
31  
32  
33  
34  
35  
36  
37  
38  
39  
40  
41  
42  
43  
44  
45  
46  
47  
48  
49  
50  
51  
52  
53  
54  
55  
56  
57  
58  
59  
60

1  
2  
3  
4  
5  
6 Our study has shown that financial incentives are of low to absent value to physician  
7  
8 volunteer engagement in all activities within the ACES program. The emotional and  
9  
10 cognitive rewards coupled with reciprocal engagement were key elements. In addition,  
11  
12 the organizational culture provided the basis for successful engagement. The need to  
13  
14 enhance scholarly recognition was identified. Literature supports that the internal  
15  
16 motivation is a strong driver of volunteer teacher participation.<sup>9</sup> The high value placed  
17  
18 on personal satisfaction appears to be consistent across a variety of contexts. This  
19  
20 domain of personal satisfaction can be further broken down into the emotional, cognitive  
21  
22 and reciprocal form of engagement and mapped to our conceptual framework. In  
23  
24 particular, physicians felt a strong sense of cognitive engagement with regard to being  
25  
26 ‘pushed’ out of their comfort zone so as to reach a new and expanded state of  
27  
28 performance.  
29  
30  
31  
32  
33  
34  
35

36 We found workload and increased external demands to be a threat to physician volunteer  
37  
38 activities. Yet, in the ACES group we identified healthcare professionals that have  
39  
40 remained engaged despite considerable external demands. In fact most volunteers in this  
41  
42 program would contribute further if called upon. The high level of engagement of these  
43  
44 individuals is complex and involves many elements of the conceptual framework. In  
45  
46 some circumstances, when other demands increased, volunteers modified their role and  
47  
48 mentored new leaders, allowing for ongoing engagement. Moving away from traditional  
49  
50 ‘individual’ leadership theories, team leadership theory includes the concept of team  
51  
52 leadership capacity, which includes the entire range of the team’s leadership.<sup>43</sup> It appears  
53  
54  
55  
56  
57  
58  
59  
60

1  
2  
3 that the ACES organizational structure has capitalized on this distributed shared  
4  
5 leadership approach to ensure sustainable and diversity of available leaders.  
6  
7  
8  
9

### 10 **Limitations**

11  
12 There are several limitations to our study. It was a cross-sectional study, performed in a  
13  
14 single context of highly engaged health care professionals most of whom were located at  
15  
16 academic teaching hospitals. The nature of engagement within the organization may be  
17  
18 context specific. Further studies are required to determine the transferability our findings  
19  
20 to other contexts. In our study we sought perspectives from volunteers performing  
21  
22 various tasks. However, given the sample size it is not possible to determine if the  
23  
24 underlying components of engagement change with variation in the roles. Further, we  
25  
26 did not examine the time spent volunteering (e.g., hours/weeks per year) nor did we seek  
27  
28 out individuals who may have volunteered but later completely withdrew. We will  
29  
30 ensure to capture this data in our future work. Finally, when the volunteer role includes  
31  
32 teaching, we identified that the reciprocal engagement between the student and teacher  
33  
34 adds to the overall engagement of the volunteer. This component was not in our  
35  
36 conceptual framework and could be added in future investigations where the volunteer  
37  
38 role includes teaching.  
39  
40  
41  
42  
43  
44  
45  
46  
47

### 48 **Future Research**

49  
50 The presumption that engagement is malleable is an exciting prospect.<sup>44,45</sup> A cohesive  
51  
52 framework is required to facilitate understanding of the complex construct of volunteer  
53  
54 physician engagement and this framework can be utilized in the development of  
55  
56  
57  
58  
59  
60

1  
2  
3 multifaceted approaches to enhance volunteer physician engagement. For example, an  
4  
5 intervention may include enhancing reciprocal engagement through collaborative  
6  
7 meetings and enhancing interpersonal relationships; emotional engagement by connecting  
8  
9 with individuals on a deeper level with respect to the meaning and potential outcomes of  
10  
11 their work; cognitive engagement by including intellectually challenging tasks, and  
12  
13 recognition of the volunteers work through faculty appointment, newsletters among their  
14  
15 peers, awards and scholarly acknowledgement. Further research is also required to  
16  
17 determine how we measure engagement. The conceptual framework presented in this  
18  
19 paper may aid in the design of measurement tools. The strategies and tools may vary  
20  
21 depending on type of volunteer activity and setting. Furthermore, research is required to  
22  
23 explore the construct of disengagement, and also to determine if different professional  
24  
25 “identities,” such as nurses, respiratory therapists, administrators, have different  
26  
27 facilitators and inhibitors to engagement.  
28  
29  
30  
31  
32  
33  
34  
35

### 36 **Conclusion**

37  
38 Volunteer physicians are essential to the growth and sustainability of the ACES program.  
39  
40 This organization has demonstrated great success with engaging highly effective  
41  
42 volunteers. Our conceptual framework and qualitative findings provide a preliminary  
43  
44 framework as an important initial step in understanding the complex construct of  
45  
46 volunteer physician engagement. This study will guide us in our development of a  
47  
48 multifaceted intervention, aligned with the conceptual framework, to enhance volunteer  
49  
50 physician engagement within the organization. Finally, given the current economic  
51  
52  
53  
54  
55  
56  
57  
58  
59  
60



1  
2  
3 climate, providing compensation may not be financially feasible or sustainable so  
4  
5  
6 alternative approaches must be explored to engage volunteer physicians.  
7  
8  
9  
10  
11  
12  
13  
14  
15  
16  
17  
18  
19  
20  
21  
22  
23  
24  
25  
26  
27  
28  
29  
30  
31  
32  
33  
34  
35  
36  
37  
38  
39  
40  
41  
42  
43  
44  
45  
46  
47  
48  
49  
50  
51  
52  
53  
54  
55  
56  
57  
58  
59  
60

For peer review only

1  
2  
3  
4  
5 **Contributors:** Dr. Sarti and Dr. Sutherland had full access to all the data in the study  
6 and take responsibility for the integrity of the data and the accuracy of the data analysis.  
7 Study concept and design: Sarti, Sutherland, Landriault, DesRosier, Brien, Cardinal  
8 Acquisition of data: Sarti, Sutherland, Landriault, DesRosier  
9 Analysis and interpretation of data: Sarti, Sutherland, Landriault, Cardinal  
10 Drafting of the manuscript: Sarti and Sutherland  
11 Critical revision of the manuscript for important intellectual content: Sarti, Sutherland,  
12 Landriault, DesRosier, Brien, Cardinal  
13 Obtained funding: Landriault, Brien, Cardinal  
14 Administrative, technical, or material support: Landriault, DesRosier  
15 Study supervision: Sarti, Sutherland, Cardinal  
16 All authors have approved the final version of this manuscript.  
17  
18

19  
20 **Acknowledgements:** We would like to thank the healthcare professionals who  
21 participated in this study and shared their experiences and opinions with the research  
22 team.  
23

24 **Funding/Support:** Resources and secretariat support for this project were provided by  
25 the Royal College  
26

27  
28 **Competing interest:** None.  
29

30 **Ethics approval:** This study was granted an official exemption by the Chair of The  
31 Ottawa Hospital Research Ethics Board  
32

33  
34 **Disclaimer:** None  
35

36 **Previous Presentations:** None  
37  
38  
39  
40  
41  
42  
43  
44  
45  
46  
47  
48  
49  
50  
51  
52  
53  
54  
55  
56  
57  
58  
59  
60

**REFERENCES:**

1. Taitz JM, Lee TH, Sequist TD. A framework for engaging physicians in quality and safety. *BMJ Quality & Safety*. 2012;21(9):722–728.
2. Volunteering. *Wikipedia, the free encyclopedia*. 2015. Available at: <http://en.wikipedia.org/wiki/Volunteering>. Accessed October 1, 2014.
3. *The American Heritage College Dictionary* (4<sup>th</sup> ed.). Houghton Mifflin Company; 2010.
4. Gruen RL, Campbell EG, Blumenthal D. Public roles of US physicians: community participation, political involvement, and collective advocacy. *JAMA*. 2006;296(20):2467–2475.
5. Grande D, Armstrong K. Community volunteerism of US physicians. *J Gen Intern Med*. 2008;23(12):1987–1991.
6. Milliken AD. Physician engagement: a necessary but reciprocal process. *Canadian Medical Association Journal*. 2014;186(4):244–245.
7. Snell AJ, Briscoe D, Dickson G. From the inside out: the engagement of physicians as leaders in health care settings. *Qual Health Res*. 2011;21(7):952–967.
8. Mazurenko O, Hearld LR. Environmental factors associated with physician's engagement in communication activities. *Health Care Manage Rev*. 2014:1.
9. Kumar A, Kallen DJ, Mathew T. Volunteer faculty: what rewards or incentives do they prefer? *Teach Learn Med*. 2002;14(2):119–123.
10. Vath BE. Volunteer physician faculty and the changing face of medicine. *Western Journal of Medicine*. 2001;174(4):242–246.
11. Fredricks JA, Blumenfeld PC. School engagement: Potential of the concept, state of the evidence. *Review of Educational Research*. 2004;74(1):59–109.

- 1  
2  
3  
4  
5  
6  
7  
8  
9  
10  
11  
12  
13  
14  
15  
16  
17  
18  
19  
20  
21  
22  
23  
24  
25  
26  
27  
28  
29  
30  
31  
32  
33  
34  
35  
36  
37  
38  
39  
40  
41  
42  
43  
44  
45  
46  
47  
48  
49  
50  
51  
52  
53  
54  
55  
56  
57  
58  
59  
60
12. Anderson JL, Adams CD, Antman EM, et al. ACC/AHA 2007 guidelines for the management of patients with unstable angina/non-ST-Elevation myocardial infarction: a report of the American College of Cardiology/American Heart Association Task Force on Practice Guidelines (Writing Committee to Revise the 2002 Guidelines for the Management of Patients With Unstable Angina/Non-ST-Elevation Myocardial Infarction) developed in collaboration with the American College of Emergency Physicians, the Society for Cardiovascular Angiography and Interventions, and the Society of Thoracic Surgeons endorsed by the American Association of Cardiovascular and Pulmonary Rehabilitation and the Society for Academic Emergency Medicine. *J Am Coll Cardiol.* 2007;50(7):e1–e157.
13. Adams HP, del Zoppo G, Alberts MJ, et al. Guidelines for the early management of adults with ischemic stroke: a guideline from the American Heart Association/American Stroke Association Stroke Council, Clinical Cardiology Council, Cardiovascular Radiology and Intervention Council, and the Atherosclerotic Peripheral Vascular Disease and Quality of Care Outcomes in Research Interdisciplinary Working Groups: the American Academy of Neurology affirms the value of this guideline as an educational tool for neurologists. *Stroke.* 2007;38(5):1655–1711.
14. Dellinger RP, Levy MM, Carlet JM, et al. Surviving Sepsis Campaign: international guidelines for management of severe sepsis and septic shock: 2008. In: Vol 36. 2008:296–327.
15. Rivers E, Nguyen B, Havstad S, et al. Early goal-directed therapy in the treatment of severe sepsis and septic shock. *N Engl J Med.* 2001;345(19):1368–1377.
16. Rivers EP, Coba V, Whitmill M. Early goal-directed therapy in severe sepsis and septic shock: a contemporary review of the literature. *Curr Opin Anaesthesiol.* 2008;21(2):128–140.
17. Patton MQ. *Qualitative Research & Evaluation Methods.* SAGE Publications; 2014.

- 1  
2  
3 18. Miles MB, Huberman AM, Saldaña J. *Qualitative Data Analysis*. SAGE Publications,  
4 Incorporated; 2013.  
5  
6  
7  
8 19. Wenger, E. (1999). *Communities of Practice*. Cambridge University Press.  
9  
10  
11 20. Preskill H, Torres RT. *Evaluative Inquiry for Learning in Organizations*. Thousand Oaks,  
12 CA: SAGE; 1999.  
13  
14 21. Creswell JW. *Educational Research: Planning, Conducting, and Evaluating Quantitative  
15 and Qualitative Research*. Boston, MA: Pearson; 2012.  
16  
17 22. Creswell JW, Hanson WE, Plano VLC, Morales A. Qualitative Research Designs Selection  
18 and Implementation. *The Counseling Psychologist*. 2007;35(2):236–264.  
19  
20  
21 23. Hennink M, Hutter I, Bailey A. *Qualitative Research Methods*. SAGE; 2010.  
22  
23  
24 24. Miles MB, Huberman AM. *Qualitative Data Analysis: an Expanded Sourcebook*. SAGE;  
25 1994.  
26  
27  
28 25. Viera AJ, Garrett JM. Understanding interobserver agreement: the kappa statistic. *Fam Med*.  
29 2005;37(5):360–363.  
30  
31  
32  
33 26. Cama R. *Evidence-Based Healthcare Design*. Hoboken, NJ: John Wiley & Sons, Inc.; 2009.  
34  
35  
36 27. White, A. *Continuous Quality Improvement*. London, UK: Piatkus Books; 1996.  
37  
38  
39 28. Yerkes, R., & Dodson, J. The Dancing Mouse: A study in animal behavior. *Journal of  
40 Comparative Neurology & Psychology*. 1907; 18, pp.459-482.  
41  
42  
43 29. Deci, E., & Ryan, M. *Intrinsic motivation and self-determination in human behavior*. New  
44 York, NY: Plenum; 1985.  
45  
46  
47 30. Deci, E., & Ryan, M. The support of autonomy and control of behavior. *Journal of  
48 Personality and Social Psychology*. 1987;53:1024-1037.  
49  
50  
51  
52  
53  
54  
55  
56  
57  
58  
59  
60

- 1  
2  
3 31. Emerson, RM (1987). Toward a theory of value in social exchange. *Social exchange*  
4 theory, 11, 46.  
5  
6  
7  
8 32. Bone PF. Word-of-mouth effects on short-term and long-term product judgments. *Journal of*  
9 *Business Research*. 1995;32(3):213–223.  
10  
11  
12 33. Gilly MC, Graham JL, Wolfenbarger MF, Yale LJ. A Dyadic Study of Interpersonal  
13 Information Search. *Journal of the Academy of Marketing Science*. 1998;26(2):83–100.  
14  
15  
16 34. Bansal HS, Voyer PA. Word-of-Mouth Processes within a Services Purchase Decision  
17 Context. *Journal of Service Research*. 2000;3(2):166–177.  
18  
19  
20 35. Lau GT, Ng S. Individual and Situational Factors Influencing Negative Word-of-Mouth  
21 Behaviour. *Canadian Journal of Administrative Sciences / Revue Canadienne des Sciences*  
22 *de l'Administration*. 2001;18(3):163–178.  
23  
24  
25 36. Van Hove G, Lievens F. Tapping the grapevine: a closer look at word-of-mouth as a  
26 recruitment source. *J Appl Psychol*. 2009;94(2):341–352.  
27  
28  
29 37. Feldman JM, Lynch JG. Self-generated validity and other effects of measurement on belief,  
30 attitude, intention, and behavior. *Journal of Applied Psychology*. 1988;73(3):421–435.  
31  
32  
33 38. Herr PM, Kardes FR, Kim J. Effects of Word-of-Mouth and Product-Attribute Information  
34 on Persuasion: An Accessibility-Diagnosticity Perspective. *Journal of Consumer Research*.  
35 1991;17(4):454.  
36  
37  
38 39. Rivera MT, Soderstrom SB, Uzzi B. Dynamics of Dyads in  
39 Social Networks: Assortative, Relational, and Proximity Mechanisms. *Annu Rev Sociol*.  
40 2010;36:91–115.  
41  
42  
43 40. Newman ME. Clustering and preferential attachment in growing networks. *Phys Rev E Stat*  
44 *Nonlin Soft Matter Phys*. 2001;64(2 Pt 2):025102.  
45  
46  
47  
48  
49  
50  
51  
52  
53  
54  
55  
56  
57  
58  
59  
60

- 1  
2  
3  
4  
5  
6  
7  
8  
9  
10  
11  
12  
13  
14  
15  
16  
17  
18  
19  
20  
21  
22  
23  
24  
25  
26  
27  
28  
29  
30  
31  
32  
33  
34  
35  
36  
37  
38  
39  
40  
41  
42  
43  
44  
45  
46  
47  
48  
49  
50  
51  
52  
53  
54  
55  
56  
57  
58  
59  
60
41. Burt RS. Decay functions. *Social Networks*. 2000;22(1):1–28.
42. Martin JL, Yeung K-T. Persistence of close personal ties over a 12-year period. *Social Networks*. 2006;28(4):331–362.
43. Northouse PG. *Leadership*. SAGE Publications; 2012.
44. Coates H. The value of student engagement for higher education quality assurance. *Quality in Higher Education*. 2005;11(1):25–36.
45. Parsons J, Taylor L. *Student engagement: What do we know and what should we do?* 2011.  
Available at:  
[https://education.alberta.ca/media/6459431/student\\_engagement\\_literature\\_review\\_2011](https://education.alberta.ca/media/6459431/student_engagement_literature_review_2011).  
Accessed October 10, 2014.

1  
2  
3  
4  
5  
6  
7  
8  
9  
10  
11  
12  
13  
14  
15  
16  
17  
18  
19  
20  
21  
22  
23  
24  
25  
26  
27  
28  
29  
30  
31  
32  
33  
34  
35  
36  
37  
38  
39  
40  
41  
42  
43  
44  
45  
46  
47  
48  
49  
50  
51  
52  
53  
54  
55  
56  
57  
58  
59  
60

**List of Figures:**

Figure 1. Conceptual Framework

For peer review only



1  
2  
3 **List of Tables:**  
4

5  
6 Table 1. Characteristics of interview participants.  
7

8 Table 2. Summary of the qualitative findings.  
9  
10  
11  
12  
13  
14  
15  
16  
17  
18  
19  
20  
21  
22  
23  
24  
25  
26  
27  
28  
29  
30  
31  
32  
33  
34  
35  
36  
37  
38  
39  
40  
41  
42  
43  
44  
45  
46  
47  
48  
49  
50  
51  
52  
53  
54  
55  
56  
57  
58  
59  
60

For peer review only

1  
2  
3  
4  
5  
6  
7  
8  
9  
10  
11  
12  
13  
14  
15  
16  
17  
18  
19  
20  
21  
22  
23  
24  
25  
26  
27  
28  
29  
30  
31  
32  
33  
34  
35  
36  
37  
38  
39  
40  
41  
42  
43  
44  
45  
46  
47  
48  
49  
50  
51  
52  
53  
54  
55  
56  
57  
58  
59  
60

**List of Supplemental Online Content**

Appendix S1. Interview Guides.

For peer review only

Leader Engagement

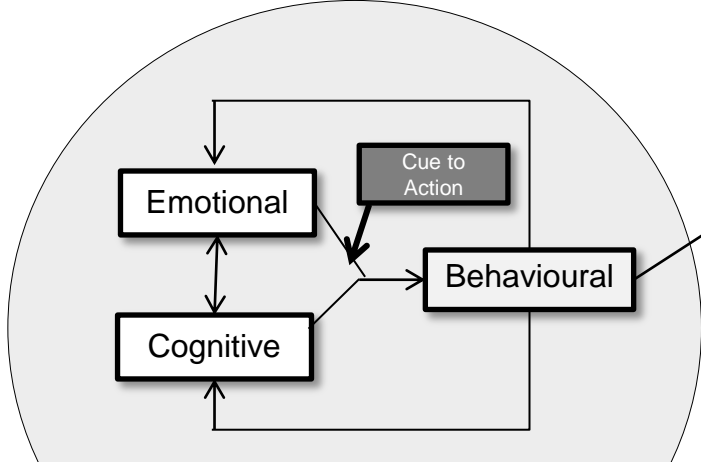

Organizational Contribution / Performance

Reciprocal Engagement

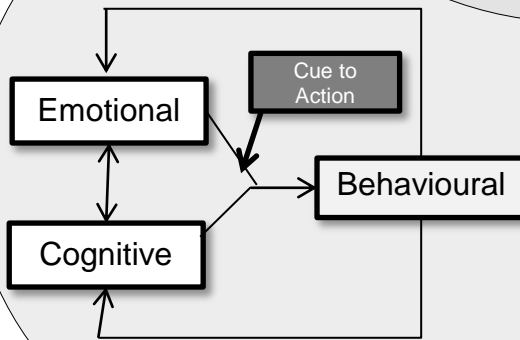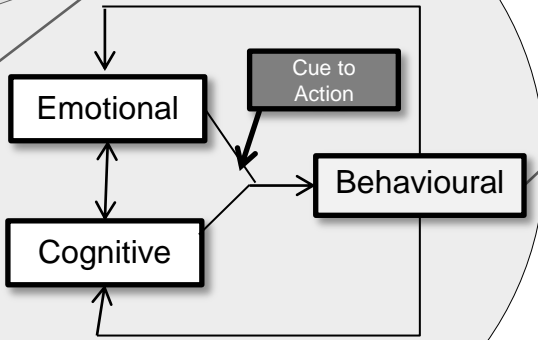

Physician Engagement

Physician Engagement

Environment / Context / Organizational Culture

1  
2  
3  
4  
5  
6  
7  
8  
9  
10  
11  
12  
13  
14  
15  
16  
17  
18  
19  
20  
21  
22  
23  
24  
25  
26  
27  
28  
29  
30  
31  
32  
33  
34  
35  
36  
37  
38  
39  
40  
41  
42  
43

**Table 1. Characteristics of interview participants.**

| Characteristic          | n  | %  |
|-------------------------|----|----|
| Number                  | 30 |    |
| Region *                |    |    |
| Mountain                | 7  | 23 |
| Prairies                | 3  | 10 |
| Ontario                 | 14 | 47 |
| Quebec                  | 2  | 7  |
| Atlantic                | 4  | 13 |
| Specialty/Discipline ** |    |    |
| Critical Care           | 23 | 77 |
| Anesthesia              | 7  | 23 |
| Internal Medicine       | 5  | 17 |
| Surgery                 | 3  | 10 |
| Family Medicine         | 3  | 10 |
| Nurses                  | 2  | 7  |
| Respiratory Therapists  | 2  | 7  |
| Pediatric Critical Care | 1  | 3  |

\* The regions of Canada have been divided in the following way: Mountain includes British Columbia and Alberta; Prairies include Saskatchewan and Manitoba; Atlantic includes all Atlantic Provinces.

\*\* Individuals were classified under their current practice specialties. Note that an individual may be practicing in more than one specialty.

Table 2: Summary of the qualitative findings.

|                                            |
|--------------------------------------------|
| <b>1. Volunteer Recruitment</b>            |
| a. Word of mouth                           |
| b. Snowball approach                       |
| c. Career stage                            |
| d. Barriers                                |
| <b>2. Volunteer Retention</b>              |
| a. Distributed leadership and career paths |
| b. Program change and evolution/innovation |
| c. Comfort zone                            |
| d. Reciprocal engagement                   |
| e. Intrinsic motivation                    |
| f. Learners                                |
| <b>3. Volunteer Exchange</b>               |
| a. Career opportunities                    |
| b. Keep current                            |
| c. Academic currency                       |
| <b>4. Volunteer Recognition</b>            |
| a. Personal recognition                    |
| b. Scholarly/academic work                 |
| <b>5. Educator Network</b>                 |
| a. Common vision                           |
| b. Duration or participation/loyalty       |
| c. Affect                                  |
| <b>6. Quasi Volunteerism</b>               |
| a. Academic pressure                       |
| b. Curriculum vitae                        |

## Interview Guide 1

### Introduction

#### 1. Introduction

Thanks for agreeing to participate ... We are conducting a needs assessment for the ACES course (introduce the project). Consent.

#### 2. Background

- a. Goal of the ACES course - provide the learner with the necessary knowledge, skills and attitude to recognize and manage a patient who is acutely and critically ill in the first hour of presentation
- b. Modality of the ACES course - multimodal: e-learning, book, case seminars, technical skill workshop, simulation, and bedside tools

#### 3. Purpose of the needs assessment

- a. Interest expressed by various groups to customize the ACES course to a specific population
- b. Facilitate the dissemination of the course across Canada
- c. Exploring interest in an interprofessional course
- d. Explore business models that would facilitate dissemination
- e. Explore peer-review process and means of promoting academic contributions of faculty

#### 4. Please let us know if you are NOT in a position to answer some of the questions (e.g. vice-dean discussing weaknesses of residents during resuscitation)

#### 5. Interview will be recorded; all information will be kept confidential

### Demographics

1. What is your professional designation?
2. What are your current roles?
3. Can you let me know what type of institution you work in (Community Hospital, Secondary, Tertiary, and Quaternary)?
4. When it comes to responding to a crisis, what is the usual makeup of the team in your institution?
5. Are you familiar with the ACES course? Have you participated or taught an ACES course?

### Content

1. When it comes to responding to a crisis, what are the team's strengths?
2. When it comes to responding to a crisis, what are team's weaknesses?
3. Probes
  - a. What about (mention any members of the team that have not been addressed)

- 1
  - 2
  - 3
  - 4
  - 5
  - 6
  - 7
  - 8
  - 9
  - 10
  - 11
  - 12
  - 13
  - 14
  - 15
  - 16
  - 17
  - 18
  - 19
  - 20
  - 21
  - 22
  - 23
  - 24
  - 25
  - 26
  - 27
  - 28
  - 29
  - 30
  - 31
  - 32
  - 33
  - 34
  - 35
  - 36
  - 37
  - 38
  - 39
  - 40
  - 41
  - 42
  - 43
  - 44
  - 45
  - 46
  - 47
  - 48
  - 49
  - 50
  - 51
  - 52
  - 53
  - 54
  - 55
  - 56
  - 57
  - 58
  - 59
  - 60
4. At the end of the course, the learner should be able to..... (Please list the 5 most important performance objectives)
  5. Is there anything else that you can think of that we have not discussed?

### Course format

1. Do you think that pre-course on-line content would be useful?
  - a. Do you anticipate that you or your learners may have any problems accessing online material?
  - b. What is the purpose of having pre-course on-line content?
    - i. Teaching knowledge, decision-making, other?
    - ii. Preparation for the face-to-face course
    - iii. Assessment of learners?
    - iv. Others
  - c. What should be the duration of a pre-course on-line session?
  - d. Should the pre-course on-line content be mandatory?
    - i. If so, can you think of ways to ensure your or your learners compliance with mandatory online content?
2. Do you think that post-course on-line content would be useful?
  - a. Would it be useful for you to have access to the pre-course on-line content after the course for further revision? How long?
  - b. What is the purpose of having post-course on-line content?
    - i. Teaching knowledge, decision-making, other?
    - ii. Preparation for the face-to-face course
    - iii. Assessment of learners?
    - iv. Post-course assessment of knowledge retention
    - v. Others
  - c. What should be the duration of an on-line session?
    - i. Post face-to-face course
  - d. Should post-course on-line content be mandatory?
    - i. If so, can you think of ways to ensure your or your learners compliance with mandatory online content?
3. Do you think that the program should have a face-to-face course?
  - a. How long should the course be?
  - b. What should be the preferred modalities?
    - a. Simulation?
    - b. Case-based seminars?
    - c. Technical skills workshops?
    - d. Didactic lecture?

- 1
  - 2
  - 3
  - 4
  - 5
  - 6
  - 7
  - 8
  - 9
  - 10
  - 11
  - 12
  - 13
  - 14
  - 15
  - 16
  - 17
  - 18
  - 19
  - 20
  - 21
  - 22
  - 23
  - 24
  - 25
  - 26
  - 27
  - 28
  - 29
  - 30
  - 31
  - 32
  - 33
  - 34
  - 35
  - 36
  - 37
  - 38
  - 39
  - 40
  - 41
  - 42
  - 43
  - 44
  - 45
  - 46
  - 47
  - 48
  - 49
  - 50
  - 51
  - 52
  - 53
  - 54
  - 55
  - 56
  - 57
  - 58
  - 59
  - 60
- e. Other?
  - c. What should be the relative proportion of time spent for each modality?
    - a. Simulation?
    - b. Case-based seminars?
    - c. Technical skills workshops?
    - d. Didactic lecture?
    - e. Other?
  - d. Should the pre-course material be reviewed during the face-to-face course?
  - e. What should determine the instructor to participant ratio?
    - a. Simulation?
    - b. Case-based seminars?
    - c. Technical skills workshops?
    - d. Didactic lecture?
    - e. Other?
  - f. Tell me what you think about making this course interprofessional...
    - a. What would be the advantages?
    - b. What would be the challenges?
4. How complicated is it for your institution/organization to organize a course that contains a large components of simulation training?
- a. Do you have access to simulation laboratory with the required equipment?
  - b. Do you have access to simulation engineer
  - c. Do you have trained instructors
  - d. Do you have course co-coordinators with experience delivering such courses

### Market analysis

1. What do you like most about the ACES course?
2. What changes would most improve the ACES course?
3. Do you know of competing courses currently available?
4. What do you like the most about these other courses?
5. What changes would most improve these other courses?
6. If you are not likely to deliver the ACES course, why not?
7. What would make you more likely to deliver the ACES course?
  - a. Is costing an issue?
  - b. Are difficulties delivering the ACES course an issue?
    - i. Low participants to instructor ratio
    - ii. Space
    - iii. Equipment



- 1
  - 2
  - 3
  - 4
  - 5
  - 6
  - 7
  - 8
  - 9
  - 10
  - 11
  - 12
  - 13
  - 14
  - 15
  - 16
  - 17
  - 18
  - 19
  - 20
  - 21
  - 22
  - 23
  - 24
  - 25
  - 26
  - 27
  - 28
  - 29
  - 30
  - 31
  - 32
  - 33
  - 34
  - 35
  - 36
  - 37
  - 38
  - 39
  - 40
  - 41
  - 42
  - 43
  - 44
  - 45
  - 46
  - 47
  - 48
  - 49
  - 50
  - 51
  - 52
  - 53
  - 54
  - 55
  - 56
  - 57
  - 58
  - 59
  - 60
- iv. Personnel (simulation engineer, trained actors, course coordinator)
8. Imagine that you are tasked to widely disseminate this course in order to improve patient care. Can you think of a business model that would favor wide dissemination?
- a. Keeping in mind that there is a cost related to the development and dissemination of the material.

### Peer review process

1. Do you have any suggestions on how to best organize and facilitate the peer-review process?
  - a. Initially
  - b. On an ongoing process

### Recognition

1. How could the Royal College best recognize your or your institution's contributions in the creation and delivery of the ACES course?
  - a. Would it help if creators were informed of their material evaluations and extent of dissemination? How often?
  - b. Would including the sums invested in the completion of the project be useful as a means of recognition?

## Interview Guide 2

### Volunteer Engagement in the ACES program

- Target – Leadership within the organization and some Volunteer Physicians
- Introduction, Confidentiality, Consent

### Leadership Questions:

1. What is your role in the ACES program?
2. How do volunteers impact the program? Has this changed over the years / history of the program?
3. Who are the volunteers?
4. Where are they located?
5. What roles do volunteers perform?
  - a. *Probe – development, delivery, administration, promotion of the program, etc. Specifically link to the conceptual framework*
6. Are there more ways that you envision them being involved?
7. Why do you think physicians volunteer their time with the ACES program?
  - a. *Probes: To be completed -*
    - i. *Behavioural*
    - ii. *Emotional*
    - iii. *Cognitive*
      1. *The challenge of the activity? Or mastering challenging / difficult ideas/skills/tasks?*
8. How are they currently recruited?
9. What are the barriers to recruitment and retention of volunteers?
10. What are the facilitators to recruitment and retention of volunteers?
11. How are they rewarded/appreciated for their contribution?
12. How do you see the ACES program evolving and how will this impact the volunteers? Impact the need for volunteers?
13. If a need for more volunteers is identified - Any solutions to increasing capacity and retention?

### Questions regarding your volunteer involvement

14. Do you volunteer time with the ACES program?
15. What activities / role do you perform as a volunteer?
16. Why do you volunteer?
17. How is your contribution acknowledged?

**Volunteer Questions:**

1. What is your role in the ACES program?
2. How long have you been a volunteer with ACES?
3. How did you become involved with ACES?
4. Why do you volunteer?
  - a. Probes:
    - i. Behavioural
    - ii. Emotional
    - iii. Cognitive
      1. Do find this work challenging? by the activity and or your involvement? Or mastering challenging / difficult ideas/skills/tasks?
  - b. What specifically – ie, what part is challenging? What part do you 'love'? what part are you most 'interested' in?
5. Have you ever considered increasing your involvement with ACES?
6. Have you ever considered decreasing or discontinuing your involvement with ACES?
7. Are there factors that maintain your involvement with ACES?
8. What improvements could be made to better meet your needs as a volunteer with the organization?

# BMJ Open

## Exploring the components of physician volunteer engagement: a qualitative investigation of a national Canadian simulation based training program

|                                 |                                                                                                                                                                                                                                                                                                                                                                                                                                                                                         |
|---------------------------------|-----------------------------------------------------------------------------------------------------------------------------------------------------------------------------------------------------------------------------------------------------------------------------------------------------------------------------------------------------------------------------------------------------------------------------------------------------------------------------------------|
| Journal:                        | <i>BMJ Open</i>                                                                                                                                                                                                                                                                                                                                                                                                                                                                         |
| Manuscript ID                   | bmjopen-2016-014303.R1                                                                                                                                                                                                                                                                                                                                                                                                                                                                  |
| Article Type:                   | Research                                                                                                                                                                                                                                                                                                                                                                                                                                                                                |
| Date Submitted by the Author:   | 10-Mar-2017                                                                                                                                                                                                                                                                                                                                                                                                                                                                             |
| Complete List of Authors:       | Sarti, Aimee J.; Ottawa Hosp, Critical Care<br>Sutherland, Stephanie; Ottawa Hosp, Critical Care<br>Landriault, Angele; Royal College of Physicians and Surgeons of Canada (RCPSC), Practice, Performance and Innovation (PPI) unit<br>DesRosier, Kirk; Royal College of Physicians and Surgeons of Canada (RCPSC), Practice, Performance and Innovation (PPI) unit<br>Brien, Susan; Royal College of Physicians and Surgeons of Canada<br>Cardinal, Pierre; Ottawa Hosp, Critical Care |
| <b>Primary Subject Heading</b>: | Medical education and training                                                                                                                                                                                                                                                                                                                                                                                                                                                          |
| Secondary Subject Heading:      | Intensive care, Qualitative research                                                                                                                                                                                                                                                                                                                                                                                                                                                    |
| Keywords:                       | Physicians, Volunteers, QUALITATIVE RESEARCH, MEDICAL EDUCATION & TRAINING                                                                                                                                                                                                                                                                                                                                                                                                              |
|                                 |                                                                                                                                                                                                                                                                                                                                                                                                                                                                                         |

SCHOLARONE™  
Manuscripts

Only

1  
2  
3  
4  
5  
6  
7  
8  
9  
10  
11  
12  
13

## Exploring the components of physician volunteer engagement: a qualitative investigation of a national Canadian simulation based training program

Sarti, Aimee J. MD; Sutherland, Stephanie PhD; Landriault, Angele BScN; DesRosier, Kirk; Brien, Susan MD, MEd; Cardinal, Pierre MD, MScEpi

14  
15  
16  
17  
18  
19  
20  
21  
22  
23

### Affiliations:

Dr. Sarti is a clinical scholar, The Ottawa Hospital, Department of Medicine, Division of Critical Care; research collaborator with The Royal College of Physicians and Surgeons of Canada (RCPSC); Practice, Performance and Innovation (PPI) unit;

Dr. Sutherland is an educational research consultant with expertise in research methodology and program evaluation, Department of Innovation in Medical Education, University of Ottawa (DIME), Ontario, Canada.

Ms. Landriault manager for the Royal College of Physicians and Surgeons of Canada (RCPSC), Practice, Performance and Innovation (PPI) unit, Ottawa, Ontario, Canada.

Mr. DesRosier is an instructional designer and evaluator for the Royal College of Physicians and Surgeons of Canada (RCPSC), Practice, Performance and Innovation (PPI) unit, Ottawa, Ontario, Canada.

Dr. Brien is the Director of Practice and Systems Innovation and Practice, Performance and Innovation, as well as VP Asia Pacific with Royal College International (RCI), at the Royal College of Physicians and Surgeons of Canada (RCPSC).

Dr. Cardinal is professor, the University of Ottawa, Department of Medicine, Division of Critical Care; Senior clinical scholar, The Royal College of Physicians and Surgeons of Canada (RCPSC); Practice, Performance and Innovation (PPI) unit, Ottawa, Ontario, Canada.

42  
43  
44  
45  
46  
47  
48  
49  
50  
51  
52  
53  
54

### Corresponding Author:

Aimee Sarti MD

The Royal College of Physicians and Surgeons of Canada (RCPSC), Practice, Performance and Innovation (PPI) Unit

774 Echo Drive, Ottawa, Ontario, Canada, K1S 5N8

Telephone – 613-730-8177 ext 599

Fax – 613-730-2410

Email – [asarti@toh.on.ca](mailto:asarti@toh.on.ca)

55  
56  
57  
58  
59  
60

**Key Words:** volunteer, engagement, qualitative research, medical education, critical care

## Abstract

**Objectives:** Conceptual clarity on physician volunteer engagement is lacking in the medical literature. The aim of this study was to present a conceptual framework to describe the elements which influence physician volunteer engagement and to explore volunteer engagement within a national educational program.

**Setting:** The context for this study was the Acute Critical Events Simulation (ACES) program in Canada, which has successfully evolved into a national educational program, driven by physician volunteers. From 2010 to 2014 the program recruited 73 volunteer health care professionals who contributed to the creation of educational materials and/or served as instructors.

**Method:** A conceptual framework was constructed based on an extensive literature review and expert consultation. Secondary qualitative analysis was undertaken on fifteen semi-structured interviews conducted from 2012 to 2013 with program directors and health care professionals across Canada. An additional fifteen interviews were conducted in 2015 with physician volunteers to achieve thematic saturation. Data was analyzed iteratively and inductive coding techniques applied.

**Results:** The majority were physicians. From the physician volunteer data, eleven themes emerged. The most prominent themes included volunteer recruitment, retention, exchange, recognition, educator network, and quasi volunteerism. Captured within these interrelated themes were the framework elements, including the synergistic effects of emotional, cognitive and reciprocal engagement. Behavioural engagement was driven by these factors along with a cue to action, which led to contributions to the ACES program.

**Conclusion:** This investigation provides a preliminary framework and supportive evidence towards understanding the complex construct of physician volunteer engagement. The need for this research is particularly important in present day, where growing fiscal constraints create challenges for medical education to do more with less.

## **Article Summary**

### **Strengths and limitations of this study**

- First study to synthesize key elements of physician volunteer engagement into a conceptual framework.
- Covers an under-investigated issue and draws upon a wider theoretical background.
- Qualitative data obtained provides new insights into physician volunteer engagement, which may offer practical ideas to improve volunteer engagement strategies.
- Our findings were obtained in one country, within one national program.
- Explored volunteer engagement in a highly engaged group of physicians, study was not able to explore disengagement.

## Introduction

Physician volunteers are essential to health care delivery and medical education.<sup>1</sup>

Despite the growing need to optimize volunteer physician engagement, there is a paucity of data on how to improve and maintain engagement. Volunteerism can be defined as any altruistic act, which is undertaken without financial gain while engagement has been defined as being “actively committed” or “to involve oneself or become occupied; to participate.”<sup>2,3</sup>

Physicians appear to highly value their role as volunteers. In a US study by Gruen et al., 95 % of physicians surveyed rated community participation as important”.<sup>4</sup> Yet, in a national survey of 319 physicians, only 39% participated in volunteer activities.<sup>5</sup>

Therefore, there appears to be a wide gap between the perceived importance of volunteering and its translation into action or engagement. Such studies illustrate the need to better understand the determinants of physician volunteer engagement and the ways in which it can be optimized.

Most of the medical literature on engagement is centered on the patient and behaviors that promote health. A few isolated studies focusing on physician engagement were identified but there is currently no accepted model describing the multifaceted dimensions of physician volunteer engagement.<sup>6-10</sup> We can draw from the social science literature in order to define and examine the various components of engagement.



1  
2  
3 The concept of engagement, specifically, school engagement has been synthesized in a  
4 review by Fredricks et al.<sup>11</sup> They present engagement as a multifaceted construct  
5 including three dynamically interrelated components: behavioural, emotional and  
6 cognitive engagement. Behavioural engagement is related specifically to the on task  
7 behavior. Emotional engagement is related to the value of the tasks as determined by the  
8 individual. Value is further divided into 4 components: “interest (enjoyment of the task),  
9 attainment value (importance of doing well on the task for confirming aspects of one’s  
10 self-schema), utility value (importance of the task for future goals), and cost (negative  
11 aspects of engaging in the task).”<sup>11</sup> Cognitive engagement refers to an individual’s  
12 motivational goals and self-regulated learning. This concept can be further described as a  
13 psychological investment in learning, understanding, and mastering knowledge or skills  
14 with a “desire to go beyond the requirements, and a preference for challenge.”<sup>11</sup>  
15  
16  
17  
18  
19  
20  
21  
22  
23  
24  
25  
26  
27  
28  
29  
30  
31  
32  
33

34 In this study, we sought to develop a conceptual framework to describe and explore the  
35 components and theoretical underpinnings of physician volunteer engagement. We  
36 began our investigation with a secondary analysis of a comprehensive needs assessment  
37 in a quality improvement initiative aimed at the overall enhancement of the Acute  
38 Critical Events Simulation (ACES) program. Later, we extended this initial work by  
39 obtaining additional data to provide evidence towards understanding the complex  
40 construct of physician volunteer engagement.  
41  
42  
43  
44  
45  
46  
47  
48  
49  
50  
51  
52

### 53 **Context**

54  
55  
56  
57  
58  
59  
60

1  
2  
3 The ACES Program is a national educational program aimed at improving the proficiency  
4 of individuals and teams involved in the early management of critically ill patients.  
5

6  
7  
8 Nurses, respiratory therapists, and physicians who are the first to respond to a patient in  
9 crisis come from various disciplines and practice in diverse milieus. Their experience  
10 managing acutely ill patients is often very limited given the low incidence of critical  
11 illness. Yet, clinical studies indicate that early recognition and management are most  
12 effective in lowering both morbidity and mortality. Randomized controlled trials and  
13 guidelines emphasize the importance of the 'golden-hour' in patients with conditions such  
14 as myocardial infarction, stroke, and sepsis.<sup>12-17</sup> The ACES program includes various  
15 simulation modalities delivered online or face-to-face as well as books and didactic  
16 material. It also includes instructor certification courses. Most of the educational  
17 materials have been customized to meet the needs of different groups of learners.  
18  
19  
20  
21  
22  
23  
24  
25  
26  
27  
28  
29  
30  
31  
32  
33

34 This program was initially developed from the vision and efforts of a small collective of  
35 Canadian critical care physicians who volunteered their time and expertise. It has  
36 successfully evolved into a national educational program, has been acquired by the Royal  
37 College of Physicians and Surgeons of Canada (RCPSC), and continues to advance and  
38 grow. Volunteers remain fundamental to the ACES program. They create materials,  
39 organize courses, teach, and conduct research. From 2010 to 2014 the program recruited  
40 a total of 73 volunteers, 69 of whom were physicians. The need for volunteers is  
41 increasing due to greater demand, addition of new forms of simulation, growth of online  
42 curricula and anticipated movement to a competency-based program.  
43  
44  
45  
46  
47  
48  
49  
50  
51  
52  
53  
54  
55  
56  
57  
58  
59  
60

## Method

A conceptual framework was constructed; secondary analysis of the ACES quality improvement initiative data was performed; additional interviews were conducted; qualitative data collection was performed and analyzed iteratively.

### Conceptual Framework

A conceptual framework is meant to explain the key factors, constructs, or variables, and their presumed relationships to be studied.<sup>18,19</sup> An extensive literature review along with expert consultation informed the development of the framework. We opted for a more pre-structured qualitative research design as we wanted to bound the study within a set of engagement variables, yet at the same time we needed to maintain enough flexibility to allow for emergent findings so as to better understand the construct of physician engagement. We adapted a student engagement conceptual framework.<sup>11</sup> We found Fredericks et al.'s theory of engagement to be useful in our medical context. In further modifying the conceptual framework we used the 'bins approach,' whereby the framework is mostly a visual catalogue of roles to be studied (e.g., physician leaders and physicians), and within each role, how the variables of engagement influence their actions.<sup>19</sup> A multidisciplinary panel of experts iteratively collaborated on the modifications to the conceptual framework included critical care physicians and leaders, administrators, system-level policymakers and a sociologist.

We developed the model depicted in Figure 1, to explore volunteer physician engagement in a comprehensive manner. For our study, the physician behavior of participation as a

1  
2  
3 volunteer is the desired outcome. All other elements, which contribute and lead to this  
4  
5 behavior are under investigation. In this figure, we have depicted two physicians and one  
6  
7 leader for simplicity. In reality there may be many leaders and physicians. We define a  
8  
9 leader as an individual within the group who influences others towards a mutual purpose  
10  
11 or common goal.<sup>20</sup> We define an individual's engagement as a multidimensional  
12  
13 construct including emotional and cognitive engagement which ultimately can lead to  
14  
15 behavioral engagement, with tasks directed toward contributing to organizational  
16  
17 development and/or a specific domain, such as education, quality and safety, etc.<sup>11</sup>  
18  
19

20  
21  
22 <insert Figure 1 about here>  
23  
24  
25  
26  
27

28  
29 An individual's overall engagement is impacted by their demographic and psychosocial  
30  
31 characteristics. The emotional and cognitive components drive behavior. The  
32  
33 bidirectional arrows between these components indicates that the presence and/or  
34  
35 development of one component may impact the other. The behavior itself may further  
36  
37 promote the emotional and cognitive components and enhance volunteer behaviors  
38  
39 (indicated by the arrow back to the emotional and cognitive components). In addition,  
40  
41 the behavior requires a "cue to action" or trigger (which can be either intrinsic or  
42  
43 extrinsic to the individual). A simplistic example of an extrinsic "cue to action" may  
44  
45 involve the director of the program contacting a volunteer to participate.  
46  
47  
48  
49

50  
51  
52 Individual volunteers have the potential to impact each other and synergistically enhance  
53  
54 one another's engagement.' We have termed this variable "reciprocal engagement." This  
55  
56  
57  
58  
59  
60

1  
2  
3 is akin to mutual engagement involving not only individual actions/attributes but also the  
4  
5 actions/attributes of others.<sup>21</sup> This relationship and enhanced engagement potential is  
6  
7 likely secondary to the impact on the individuals' emotional, cognitive and behavioral  
8  
9 components and/or may provide a trigger leading to the behavior.  
10  
11

12  
13  
14  
15 Leaders have their own intrinsic characteristics, emotional and cognitive components  
16  
17 which drive the behavior. Reciprocal engagement may also synergistically increase the  
18  
19 engagement of both the leader and individuals.  
20  
21

22  
23  
24 Ultimately, the behavioral engagement of the individual volunteers can lead to increased  
25  
26 organizational performance.<sup>22</sup> Sustainability of the volunteers likely depends on these  
27  
28 factors being maintained and may fluctuate for an individual over time with periods of  
29  
30 greater and lesser engagement, for example based on the presence or absence of a “cue to  
31  
32 action” and also based on changes in organizational culture, leadership and other  
33  
34 individuals.  
35  
36  
37  
38  
39  
40

### 41 **Data Collection and Analysis**

42  
43 As part of a quality improvement initiative of the ACES program, interviews were  
44  
45 conducted between 2012 to 2013. Participant selection was carried out using maximum  
46  
47 variation purposive sampling to identify individuals that would provide a balanced  
48  
49 representation.<sup>23-25</sup> Participants included program directors from different specialties and  
50  
51 health care professionals from different backgrounds. Upon analysis of this interview  
52  
53 data the ‘physician as volunteer’ theme was identified. To further explore this finding,  
54  
55  
56  
57  
58  
59  
60

1  
2  
3 and achieve thematic saturation we performed additional interviews with physician  
4  
5  
6 volunteers in 2015.  
7  
8  
9

10  
11 Semi-structured interview guides were designed to follow a broad, pre-determined line of  
12  
13 inquiry that was flexible and that could evolve as data collection unfolded, permitting  
14  
15 exploration of emerging themes. Interview guides were created by an interdisciplinary  
16  
17 team of investigators with expertise in medical education, simulation, sociological and  
18  
19 qualitative research methods. Interviews lasted from forty-five to sixty minutes, were  
20  
21 audio-recorded, and transcribed verbatim. (See Appendix S1, online for interview  
22  
23 guides).  
24  
25  
26  
27  
28

29  
30 Qualitative data analysis of the comprehensive data set included the application of  
31  
32 inductive coding techniques, utilizing thematic content analysis, and NVIVO software for  
33  
34 data management.<sup>19,23</sup> The research team followed Creswell's coding process where data  
35  
36 is first explored to gain a general sense of the data and then coded. These codes were  
37  
38 described and collapsed into themes.<sup>23</sup> The analysis team consisted of 3 researchers who  
39  
40 participated in coding training and meetings to develop the codebook. The three  
41  
42 researchers generated codes (from the same interview transcripts) independently. Then,  
43  
44 they engaged in consensus discussions. Inter-rater reliability, assessed prior to  
45  
46 independent coding, demonstrated a 95.73% agreement and a 0.75 Kappa score which is  
47  
48 considered to be substantial agreement.<sup>26</sup> The volunteer construct was further explored  
49  
50 and coded, through a more focused analytic approach in order to gain an in-depth  
51  
52 understanding of volunteer engagement.<sup>27</sup> In an iterative process, additional interviews  
53  
54  
55  
56  
57  
58  
59  
60

1  
2  
3 were performed to reach saturation of the subthemes specific to volunteer engagement.  
4  
5  
6 This study was granted an official exemption by The Ottawa Hospital Research Ethics  
7  
8 Board.  
9  
10

## 11 12 13 Results

14  
15  
16 For the larger study (quality improvement initiative of the ACES program) 15 interviews  
17  
18 were performed to gain a broad and comprehensive understanding of the ACES program,  
19  
20 which included program directors and health care professionals across Canada;  
21  
22 physicians (n=11), nurses (n=2) and RTs (n=2) (interview guide 1). An additional 15  
23  
24 interviews of physician volunteers were performed (interview guide 2). Overall, thirty  
25  
26 of thirty-three invited individuals agreed to participate in the semi-structured interviews  
27  
28 for a response rate of 91%. All physician volunteers that were interviewed were full  
29  
30 time clinicians and members of the ACES faculty, who are called to participate as  
31  
32 needed. Participants are displayed in Table 1.  
33  
34  
35  
36  
37  
38  
39  
40

41 **Table 1. Characteristics of interview participants.**

| 42 <b>Characteristic</b>          | 43 <b>n</b> | 44 <b>%</b> |
|-----------------------------------|-------------|-------------|
| 45 Number                         | 30          |             |
| 46 Region *                       |             |             |
| 47 Mountain                       | 7           | 23          |
| 48 Prairies                       | 3           | 10          |
| 49 Ontario                        | 14          | 47          |
| 50 Quebec                         | 2           | 7           |
| 51 Atlantic                       | 4           | 13          |
| 52 <b>Specialty/Discipline **</b> |             |             |
| 53 Critical Care                  | 23          | 77          |
| 54 Anesthesia                     | 7           | 23          |
| 55 Internal Medicine              | 5           | 17          |
| 56 Surgery                        | 3           | 10          |
| 57 Family Medicine                | 3           | 10          |

|                         |   |   |
|-------------------------|---|---|
| Nurses                  | 2 | 7 |
| Respiratory Therapists  | 2 | 7 |
| Pediatric Critical Care | 1 | 3 |

\* The regions of Canada have been divided in the following way: Mountain includes British Columbia and Alberta; Prairies include Saskatchewan and Manitoba; Atlantic includes all Atlantic Provinces.

\*\* Individuals were classified under their current practice specialties. Note that an individual may be practicing in more than one specialty.

To gain an in-depth understanding of the phenomenon of volunteer engagement, the data set was coded and 11 themes were identified and sub-coded. Of these themes, six interrelated themes – volunteer recruitment, volunteer retention, volunteer exchange, volunteer recognition, educator network, and quasi-volunteerism were most prominent in our data. A summary of the qualitative findings is presented in Table 2. Prototypical quotes are provided to elucidate each theme.

**Table 2: Summary of the qualitative findings.**

|                                            |
|--------------------------------------------|
| <b>1. Volunteer Recruitment</b>            |
| a. Word of mouth                           |
| b. Snowball approach                       |
| c. Career stage                            |
| <b>2. Volunteer Retention</b>              |
| a. Distributed leadership and career paths |
| b. Program change and evolution/innovation |
| c. Comfort zone                            |
| d. Reciprocal engagement                   |
| e. Intrinsic motivation                    |
| f. Learners                                |
| g. Barriers                                |
| <b>3. Volunteer Exchange</b>               |
| a. Career opportunities                    |
| b. Keep current                            |
| c. Academic currency                       |
| <b>4. Volunteer Recognition</b>            |
| a. Personal recognition                    |
| b. Scholarly/academic work                 |
| <b>5. Educator Network</b>                 |



- a. Common vision
- b. Duration or participation/loyalty
- c. Affect

#### 6. Quasi Volunteerism

- a. Academic pressure
- b. Curriculum vitae

### Volunteer Recruitment

**Word of Mouth.** All recruitment was accomplished through word of mouth. That is, the cue to action was uniformly described by volunteers as an informal interaction with another volunteer, usually a leader who would call the volunteers to request their involvement.

I just got a call from him [ACES Director] one day, he introduced himself and talked about this program where a few guys were getting together and trying to do this thing and at that time there were, I don't know, about 6 or 7 guys and he asked if I wanted to be part of it.

**Snowball Approach.** A snowball approach was described by participants as a means of identifying and recruiting high quality volunteers. With this approach, leaders would contact volunteers within the group, who in turn would reach out to contacts in their social networks to identify potential new recruits who have the qualities required to contribute to the group.

What I would do is have more than one person get in touch with the person they are trying to recruit. First of all you want to cherry pick the people you want to recruit. It's just like a draft in sports or something. You want to cherry pick the people you want on your team and once you've earmarked certain people and say, "this person is not just strong clinically but also has great personal skills, is humble enough to listen to feedback, and to not get offended by it but to work with it."

1  
2  
3 **Career Stage.** Participants explored the different career stages of physicians who are  
4 recruited to volunteer with the program and felt that younger physicians are generally  
5  
6  
7  
8 easier to recruit.  
9

10  
11 If it was in the middle part of their [physician] career, they may be on a certain  
12 track and it's difficult to engage them. I think it would be great if we could  
13 recruit people at mid-career because they have a bit more experience, a bit more  
14 knowledge about how things should work or how things should flow. On the  
15 other hand, if you recruit younger people, I think they are more enthusiastic and  
16 have completely new ideas and that's not a bad thing either right? For me, it was  
17 great to be involved early on but I was definitely a little shy to come forward with  
18 suggestions initially because, yeah, it's just a very established crowd.  
19  
20

## 21 22 **Volunteer Retention**

23  
24 **Distributed Leadership and Career Paths.** The organization embraces an open culture  
25 creating a collaborative environment, which allows for new leaders to be brought in and  
26 mentored by long standing leaders. This relationship enables long-standing leaders to  
27 remain involved with the program while balancing other career demands. In this way,  
28  
29  
30  
31  
32  
33  
34 ACES is able to deepen its leadership base by distributing responsibilities to others.  
35

36  
37 I have decreased in participation, though I still remain section chair, well it is  
38 more of a co-chair position because I have a capable colleague who has taken  
39 over some of the curriculum development...I don't see myself in this role for  
40 perpetuity and so it's a good opportunity for people to transition and I think it's  
41 part of the natural transition process. I still remain involved and committed to  
42 being part of the National ACES Program and I still assist locally but I have  
43 decreased my involvement. It is more of a career choice and balancing the  
44 different aspects of my career that I've taken on as well.  
45  
46

47 **Program Change and Evolution.** The program's continual growth, ongoing  
48 modifications and innovative nature were described by volunteers as being very  
49 intellectually stimulating. This cognitive component was described by many participants  
50 as a major contributor to their initial and ongoing commitment and involvement with the  
51  
52  
53  
54  
55  
56  
57 program.  
58  
59  
60

1  
2  
3 I think the fact that we change and we grow is very important. If it was just the  
4 same program every year it will eventually become stagnant and people will lose  
5 interest.  
6

7  
8 **Comfort Zone.** Comfort zone is indicative of a behavioral state within which a person  
9 operates in an ‘anxiety neutral’ condition. The objective is to push or lead individuals  
10 beyond their comfort zone until comfort is achieved, which enables a consistent high-  
11 level performance.<sup>28,29</sup> During their interviews volunteers were asked if they felt they  
12 were drawn to more challenging tasks. One physician put it like this,  
13  
14

15  
16  
17  
18  
19  
20 So, why is it that you have to get out of your comfort zone? Why do you have to  
21 embark on a new mission or path that is quite challenging, one that there is no  
22 guarantee that it is going to work? I actually enjoy the process. I love working  
23 with others, I love creating things, and I love taking something that’s just in the  
24 idea stage, and you know transforming it into something that’s actually real.  
25  
26

27 **Reciprocal Engagement.** Participants identified that a volunteer can enhance another  
28 volunteer’s engagement and this process is cyclical. Participants further identified that  
29 interacting and connecting with students further enhanced their overall engagement.  
30  
31  
32

33  
34 It’s amazing to go [to the ACES course] and see all these people giving their time  
35 because they love to teach and want people to do better. They are genuinely  
36 interested in the well-being of these fellows to be better doctors and it’s catching  
37 you can’t help but get your love of education back.  
38  
39

40 **Intrinsic Motivation.** We use the psychological lens of motivation to underpin our  
41 understanding of intrinsic motivation. There is a fundamental distinction between actions  
42 that are self-determined and those that are controlled.<sup>30,31</sup> The former, which reflects an  
43 individual’s personal attributes and internal (intrinsic) motivation, was identified as  
44 contributing to the volunteers’ participation in the program. The answer might be as  
45 simple as, ‘I was built like that. This is who I am’. In fact, many described a strong  
46 internal drive to participate, hoping that they ‘would be called’ to action more frequently  
47  
48  
49  
50  
51  
52  
53  
54  
55  
56  
57  
58  
59  
60

1  
2  
3 to perform tasks for the organization. One participant described his experience like  
4  
5 sitting on the bench waiting for the coach to call:  
6  
7

8 I guess one of the biggest things as a volunteer, you're always somebody who is  
9 kind of on the bench and the coach may call you into play at any time. And, you  
10 kind of wonder if you're gonna get called off the bench to play...I love it and I  
11 love being invited back each time.  
12

13  
14 **Learners.** Fellows, often referred to as high-level learners by the volunteers, served as  
15 catalysts for both emotional and cognitive engagement in the ACES program. Some  
16  
17 volunteers expressed the gratification they felt in teaching the next generation of  
18  
19 intensivists, while others expressed the fulfillment in teaching such advanced learners:  
20  
21

22  
23 It's gratifying to feel like you are teaching the next generation of docs as they  
24 come through and they are high level learners who are about to become  
25 intensivists themselves so they are keen to learn.  
26  
27

28 **Barriers.** The main barriers to retention included career trajectory (as described above)  
29 and individual time constraints, including both personal and professional demands. As  
30  
31 volunteer physicians continue along their career they may choose different pursuits (e.g.,  
32  
33 research) and then do not have time to remain an ACES volunteer.  
34  
35  
36  
37  
38  
39

#### 40 **Volunteer Exchange**

41  
42 **Career Opportunities.** We use volunteer exchange from the theory of social exchange  
43 which posits that social behavior is the result of an exchange process.<sup>32</sup> Volunteers noted  
44  
45 that aside from receiving continuing medical education (CME) credit for their  
46  
47 volunteerism, their participation in the ACES course provided additional benefits for their  
48  
49 careers:  
50  
51  
52

53  
54 Being an ACES volunteer means that this is Royal College (RC) accredited and I  
55 think that speaks a lot to the quality of the course but also for an academic person  
56 who might have additional interests in teaching more RC courses, this work  
57  
58  
59  
60

stands out quite a bit.

**Keeping Current.** Volunteering in the ACES course gave individuals the benefit of staying current at a national level. This knowledge acquisition and networking opportunity both enhanced an individual's practice personally and professionally.

It's a good group of people, so it's always a good time and it's a way to keep your finger on the pulse of how things are going nationally and talk to people about what is going on in other centers.

**Academic Currency.** The benefit of volunteering in the course was viewed by many individuals in terms of professional value whereby the experience counts towards promotion and tenure at an academic institution.

It's always something you can list in your own CV within our medical practice plan. Teaching at these things counts in terms of academic points, you can put down each year that you taught this and that has academic currency.

Contributing to another's program was further described as a method of building up ones currency in that there was an expectation that, in turn, volunteer peers would "pay back" the favor at a later date.

### **Volunteer Recognition**

**Personal Recognition.** Attainment value, such that involvement of volunteers with the program confirmed aspects of one's self "this is who I am," was further described in the form of personal recognition of their role as educators, by colleagues at other universities, across the country.

**Scholarly/Academic Work.** Volunteers want their work in the ACES program to be recognized as scholarly contributions. The ACES program leadership sends letters of

1  
2  
3 recognition to volunteers' department heads, however, participants described difficulty in  
4  
5 getting universities to recognize ACES contributions as scholarly.  
6  
7

8 I think ACES does a very good job at recognizing our contributions. They  
9 catalogue and document the contributions on an annual basis, they send letters to  
10 our Department heads so they recognize us. I think the greater impact is to have  
11 an opportunity to enhance this recognition as scholarly work, to meet the criteria  
12 for standard publication in a peer review outlet.  
13

### 14 15 16 **Educator Network**

17  
18 **Common Vision.** Personal perceptions of the importance of the volunteer work coupled  
19 with a common vision, passion for education and collaborative spirit was described by  
20 participants. At the highest level the penultimate goal of potentially impacting patient  
21 care as an outcome was described by both leaders and volunteers. The potential effect  
22 on patient care (utility value) was further described as being achievable through the  
23 volunteers' abilities and opportunity to help the residents acquire the knowledge and  
24 skills required to excel in the clinical setting.  
25  
26  
27  
28  
29  
30  
31  
32  
33  
34

35 I think we share a common vision, a common passion. We all believe in  
36 education, I think that through collaboration we can do greater things than we  
37 could independently. There's a sense of satisfaction of doing it.  
38

39  
40 **Duration of Participation/Loyalty.** Participants expressed feelings of loyalty to other  
41 volunteers in the network, especially those who have been involved for a longer duration.  
42  
43

44 I think there's always going to be some loyalty because you've invested a great  
45 period of time. Also, it is one of the few tangible creations that you've helped  
46 develop and so you feel part of it.  
47  
48

49  
50 **Affect.** Deep and meaningful emotional components connecting volunteers to the ACES  
51 program educator network were identified. Being part of a network elicited strong  
52 positive emotions. The enjoyment experienced by volunteers was strongly linked to  
53 interactions with other like-minded educators. The face-to-face interaction of volunteers  
54  
55  
56  
57  
58  
59  
60

1  
2  
3 on an annual basis at varying Canadian locations was described as an essential part of the  
4  
5 organization.  
6

7  
8 When we meet it's like a bunch of friends getting together...everybody is full of  
9 energy when you arrive...everybody is happy, people are smiling...and you are  
10 basically like a big family...It's mostly, I think, emotional at that stage.  
11

## 12 **Quasi Volunteerism**

13  
14 **Academic Pressure.** The terms Quasi volunteer is reflected in both extrinsic and  
15 intrinsic motivations to extend effort into a relationship and/or activity. That is,  
16  
17 volunteers in academic teaching hospitals described 'academic pressures', especially for  
18  
19 younger doctors, where they felt they were required to meet specific academic  
20  
21 expectations:  
22  
23  
24  
25

26  
27 The premise that its volunteerism is somewhat true. Nobody has a gun to my  
28 head saying I have to do it but we all have to do something, academically. So, I  
29 guess it's quasi-volunteerism. Like if I wasn't doing this I would have to,  
30 especially us younger docs, like we are all on some degree of academic pressure  
31 to keep the university happy. So, if I were not doing this teaching, I'd be doing  
32 something else, you know?  
33  
34

35  
36 **Curriculum Vitae.** Intrinsically, participant volunteers used the teaching exposure at the  
37 national ACES course to grow their own CVs. As such, for some, the volunteer  
38  
39 activities were not performed for purely altruistic reasons, but also for professional gain:  
40  
41

42 It's good to have in your career, you have to have exposure to teaching outside of  
43 your center so this gives me the opportunity to fulfill that, so it's not all altruistic.  
44 it's something that I do need to do for my curriculum vitae.  
45  
46  
47  
48

## 49 **Discussion**

50  
51  
52 The productivity, success, and sustainability of the ACES organization depends on the  
53  
54 recruitment, retention and recognition of volunteers in a collaborative network. As  
55  
56 depicted in our conceptual framework, the synergistic effects of the individual's  
57  
58  
59  
60

1  
2  
3 emotional and cognitive engagement along with reciprocal engagement within the  
4 environmental context and culture of the organization, followed by a cue to action, leads  
5 to behavioural engagement in volunteer activities and contributions to the ACES  
6 program. Wherein the conceptual framework has underpinned and bounded the study, as  
7 described by Fredricks et al. (2004), we have also found that it is difficult to specifically  
8 separate out the behavioural, emotional and cognitive elements of engagement. We feel  
9 that our findings call for richer characterizations of how physicians behave, feel, and  
10 think.  
11  
12  
13  
14  
15  
16  
17  
18  
19  
20  
21  
22  
23

24 Overall, our study yields several key findings that contribute to our understanding of  
25 what motivates physicians to volunteer, and perhaps more importantly what sustains their  
26 volunteerism. With respect to recruitment, we found that word-of-mouth recruitment was  
27 the primary behavioural vehicle to engage new members. In the marketing literature,  
28 word-of-mouth is defined as an interpersonal communication, independent of the  
29 organization's marketing activities, about an organization or its products.<sup>33</sup> Our findings  
30 support this literature in that word-of-mouth is a dyadic communication between a source  
31 and a recipient.<sup>34</sup> This implies that the occurrence of word-of-mouth is determined by  
32 characteristics of the recipient, the characteristics of the source, and their mutual  
33 relationship.<sup>35,36</sup>  
34  
35  
36  
37  
38  
39  
40  
41  
42  
43  
44  
45  
46  
47  
48  
49  
50

51 Word-of-mouth communication was found to be particularly effective behavioral  
52 component in securing buy-in from new members when done early in the recruitment  
53 phase. That is, a phone call from one of the long-standing members of ACES early in the  
54  
55  
56  
57  
58  
59  
60



1  
2  
3 selection phase was conducted so as to gain an initial impression of potential new  
4  
5 members. This also tended to have the effect in attracting the potential recruit. This  
6  
7 supports earlier research that demonstrated that receiving positive information through  
8  
9 word-of-mouth early in the recruitment process is positively related to perceived  
10  
11 organizational attractiveness and actual recruitment.<sup>37</sup> Within the business literature, this  
12  
13 phenomenon is called the accessibility-diagnostics model. The model suggests that  
14  
15 information provided through word-of-mouth affects potential recruits' early evaluations  
16  
17 of the organization because of its accessibility in memory and its feedback potential.<sup>38,39</sup>  
18  
19 That is, if a physician receives positive word-of-mouth information on a given program  
20  
21 or organization they are more likely to think favourably when asked at a later date to  
22  
23 perform a volunteer activity. This finding has clear practical implications for practice in  
24  
25 that organizations should try to stimulate positive word-of-mouth early in the recruitment  
26  
27 process because of its positive impact on potential recruits attraction to an organization  
28  
29 and subsequent retention.  
30  
31  
32  
33  
34  
35  
36  
37  
38

39 Long-standing ACES volunteers take careful measures to select, and subsequently recruit  
40  
41 new members. In turn, this recruitment effort has a significant impact on long-term  
42  
43 retention. The majority of physicians recruited become committed to the ACES program  
44  
45 and have long-term sustainability as volunteers. We have found that a key to this  
46  
47 commitment and sustainability lies in the strength of the social networks among volunteer  
48  
49 physicians. Research on teams in which dyads are found within larger groups of people  
50  
51 (e.g., ACES volunteer physicians within the larger medical community) suggests that  
52  
53 people are likely to collaborate with others who possess qualities and skills, and know-  
54  
55  
56  
57  
58  
59  
60

1  
2  
3 how that are complementary to their own and relevant to reaching a particular objective.<sup>40</sup>  
4  
5 Interestingly, we found that many of the new recruits were already well known to at least  
6  
7 several of the ACES physician volunteers, and thus were already in their educator  
8  
9 network. This supports the notion that people are inclined to create relationships with  
10  
11 friends of their friends (or the business associates of their business associates). The effect  
12  
13 of sharing mutual acquaintances on attachment appears to be additive in that each  
14  
15 additional mutual acquaintance shared by an unconnected dyad (relationship) additionally  
16  
17 increased the likelihood that they will become acquainted.<sup>41</sup> Perhaps the reason for the  
18  
19 excellent retention and deep commitment of ACES physician volunteers is explained by  
20  
21 the structure of the ACES social networks which comprises many third party  
22  
23 connections. Research states that ties connecting people who share several common third  
24  
25 party connections are more likely to withstand the test of time.<sup>42,43</sup> As related to our  
26  
27 conceptual framework, we understand that physician volunteers exercise both emotional  
28  
29 (intrinsic commitment & loyalty) and cognitive (intellectual challenge & constant  
30  
31 change/growth) engagement that directly relate to the retention of volunteers.  
32  
33  
34  
35  
36  
37  
38  
39  
40

41 Personal satisfaction was an overarching finding that mapped directly to the emotional  
42  
43 and cognitive elements of engagement within the conceptual framework. Our study has  
44  
45 shown that financial incentives are of low to absent value to physician volunteer  
46  
47 engagement in all activities within the ACES program. The emotional and cognitive  
48  
49 rewards coupled with reciprocal engagement were key elements. In addition, the  
50  
51 organizational culture provided the basis for successful engagement. The need to enhance  
52  
53 scholarly recognition was identified. Literature supports that the internal motivation is a  
54  
55  
56  
57  
58  
59  
60

1  
2  
3 strong driver of volunteer teacher participation.<sup>9</sup> The high value placed on personal  
4  
5 satisfaction appears to be consistent across a variety of contexts. This domain of personal  
6  
7 satisfaction can be further broken down into the emotional, cognitive and reciprocal form  
8  
9 of engagement and mapped to our conceptual framework. In particular, physicians felt a  
10  
11 strong sense of cognitive engagement with regard to being ‘pushed’ out of their comfort  
12  
13 zone so as to reach a new and expanded state of performance.  
14  
15  
16

17  
18  
19 We found workload and increased external demands to be a threat to physician volunteer  
20  
21 activities. Yet, in the ACES group we identified healthcare professionals that have  
22  
23 remained engaged despite considerable external demands. In fact, most volunteers in this  
24  
25 program would contribute further if called upon. The high level of engagement of these  
26  
27 individuals is complex and involves many elements of the conceptual framework. In  
28  
29 some circumstances, when other demands increased, volunteers modified their role and  
30  
31 mentored new leaders, allowing for ongoing engagement. Moving away from traditional  
32  
33 ‘individual’ leadership theories, team leadership theory includes the concept of team  
34  
35 leadership capacity, which includes the entire range of the team’s leadership.<sup>44</sup> It appears  
36  
37 that the ACES organizational structure has capitalized on this distributed shared  
38  
39 leadership approach to ensure sustainable and diversity of available leaders.  
40  
41  
42  
43  
44  
45  
46  
47

## 48 **Limitations**

49  
50 There are several limitations to our study. It was a cross-sectional study, performed in a  
51  
52 single context of highly engaged health care professionals most of whom were located at  
53  
54 academic teaching hospitals. The nature of engagement within the organization may be  
55  
56  
57  
58  
59  
60

1  
2  
3 context specific. Further studies are required to determine the transferability our findings  
4  
5 to other contexts. In our study we sought perspectives from volunteers performing  
6  
7 various tasks. However, given the sample size it is not possible to determine if the  
8  
9 underlying components of engagement change with variation in the roles. Further, we  
10  
11 did not examine the time spent volunteering (e.g., hours/weeks per year) nor did we seek  
12  
13 out individuals who may have volunteered but later completely withdrew. We will  
14  
15 ensure to capture this data in our future work. Finally, when the volunteer role includes  
16  
17 teaching, we identified that the reciprocal engagement between the student and teacher  
18  
19 adds to the overall engagement of the volunteer. This component was not in our  
20  
21 conceptual framework and could be added in future investigations where the volunteer  
22  
23 role includes teaching.  
24  
25  
26  
27  
28  
29  
30  
31

### 32 **Future Research**

33  
34 The presumption that engagement is malleable is an exciting prospect.<sup>45,46</sup> A cohesive  
35  
36 framework is required to facilitate understanding of the complex construct of volunteer  
37  
38 physician engagement and this framework can be utilized in the development of  
39  
40 multifaceted approaches to enhance volunteer physician engagement. For example, an  
41  
42 intervention may include enhancing reciprocal engagement through collaborative  
43  
44 meetings and enhancing interpersonal relationships; emotional engagement by connecting  
45  
46 with individuals on a deeper level with respect to the meaning and potential outcomes of  
47  
48 their work; cognitive engagement by including intellectually challenging tasks, and  
49  
50 recognition of the volunteers work through faculty appointment, newsletters among their  
51  
52 peers, awards and scholarly acknowledgement. Further research is also required to  
53  
54  
55  
56  
57  
58  
59  
60

1  
2  
3 determine how we measure engagement. The conceptual framework presented in this  
4 paper may aid in the design of measurement tools. The strategies and tools may vary  
5 depending on type of volunteer activity and setting. Furthermore, research is required to  
6 explore the construct of disengagement, to determine if different professional “identities,”  
7 such as nurses, respiratory therapists, administrators, have different facilitators and  
8 inhibitors to engagement. Future studies may also explore if volunteer participation  
9 impacts an individuals’ clinical practice or career path.  
10  
11  
12  
13  
14  
15  
16  
17  
18  
19  
20  
21

## 22 **Conclusion**

23  
24 Volunteer physicians are essential to the growth and sustainability of the ACES program.  
25 This organization has demonstrated great success with engaging highly effective  
26 volunteers. Our conceptual framework and qualitative findings provide a preliminary  
27 framework as an important initial step in understanding the complex construct of  
28 volunteer physician engagement. This study will guide us in our development of a  
29 multifaceted intervention, aligned with the conceptual framework, to enhance volunteer  
30 physician engagement within the organization. Finally, given the current economic  
31 climate, providing compensation may not be financially feasible or sustainable so  
32 alternative approaches must be explored to engage volunteer physicians.  
33  
34  
35  
36  
37  
38  
39  
40  
41  
42  
43  
44  
45  
46  
47  
48  
49  
50  
51  
52  
53  
54  
55  
56  
57  
58  
59  
60

1  
2  
3  
4  
5 **Contributors:** Dr. Sarti and Dr. Sutherland had full access to all the data in the study  
6 and take responsibility for the integrity of the data and the accuracy of the data analysis.  
7 Study concept and design: Sarti, Sutherland, Landriault, DesRosier, Brien, Cardinal  
8 Acquisition of data: Sarti, Sutherland, Landriault, DesRosier  
9 Analysis and interpretation of data: Sarti, Sutherland, Landriault, Cardinal  
10 Drafting of the manuscript: Sarti and Sutherland  
11 Critical revision of the manuscript for important intellectual content: Sarti, Sutherland,  
12 Landriault, DesRosier, Brien, Cardinal  
13 Obtained funding: Landriault, Brien, Cardinal  
14 Administrative, technical, or material support: Landriault, DesRosier  
15 Study supervision: Sarti, Sutherland, Cardinal  
16 All authors have approved the final version of this manuscript.  
17  
18

19  
20 **Acknowledgements:** We would like to thank the healthcare professionals who  
21 participated in this study and shared their experiences and opinions with the research  
22 team.  
23

24 **Funding/Support:** Resources and secretariat support for this project were provided by  
25 the Royal College  
26

27  
28 **Competing interest:** None.  
29

30 **Ethics approval:** This study was granted an official exemption by the Chair of The  
31 Ottawa Hospital Research Ethics Board  
32

33  
34 **Disclaimer:** None  
35

36 **Previous Presentations:** None  
37  
38  
39  
40  
41  
42  
43  
44  
45  
46  
47  
48  
49  
50  
51  
52  
53  
54  
55  
56  
57  
58  
59  
60

## REFERENCES:

1. Taitz JM, Lee TH, Sequist TD. A framework for engaging physicians in quality and safety. *BMJ Quality & Safety*. 2012;21(9):722–728.
2. Volunteering. *Wikipedia, the free encyclopedia*. 2015. Available at: <http://en.wikipedia.org/wiki/Volunteering>. Accessed October 1, 2014.
3. *The American Heritage College Dictionary* (4<sup>th</sup> ed.). Houghton Mifflin Company; 2010.
4. Gruen RL, Campbell EG, Blumenthal D. Public roles of US physicians: community participation, political involvement, and collective advocacy. *JAMA*. 2006;296(20):2467–2475.
5. Grande D, Armstrong K. Community volunteerism of US physicians. *J Gen Intern Med*. 2008;23(12):1987–1991.
6. Milliken AD. Physician engagement: a necessary but reciprocal process. *Canadian Medical Association Journal*. 2014;186(4):244–245.
7. Snell AJ, Briscoe D, Dickson G. From the inside out: the engagement of physicians as leaders in health care settings. *Qual Health Res*. 2011;21(7):952–967.
8. Mazurenko O, Hearld LR. Environmental factors associated with physician's engagement in communication activities. *Health Care Manage Rev*. 2014:1.
9. Kumar A, Kallen DJ, Mathew T. Volunteer faculty: what rewards or incentives do they prefer? *Teach Learn Med*. 2002;14(2):119–123.
10. Vath BE. Volunteer physician faculty and the changing face of medicine. *Western Journal of Medicine*. 2001;174(4):242–246.
11. Fredricks JA, Blumenfeld PC. School engagement: Potential of the concept, state of the evidence. *Review of Educational Research*. 2004;74(1):59–109.

- 1  
2  
3  
4  
5  
6  
7  
8  
9  
10  
11  
12  
13  
14  
15  
16  
17  
18  
19  
20  
21  
22  
23  
24  
25  
26  
27  
28  
29  
30  
31  
32  
33  
34  
35  
36  
37  
38  
39  
40  
41  
42  
43  
44  
45  
46  
47  
48  
49  
50  
51  
52  
53  
54  
55  
56  
57  
58  
59  
60
12. Anderson JL, Adams CD, Antman EM, et al. ACC/AHA 2007 guidelines for the management of patients with unstable angina/non-ST-Elevation myocardial infarction: a report of the American College of Cardiology/American Heart Association Task Force on Practice Guidelines (Writing Committee to Revise the 2002 Guidelines for the Management of Patients With Unstable Angina/Non-ST-Elevation Myocardial Infarction) developed in collaboration with the American College of Emergency Physicians, the Society for Cardiovascular Angiography and Interventions, and the Society of Thoracic Surgeons endorsed by the American Association of Cardiovascular and Pulmonary Rehabilitation and the Society for Academic Emergency Medicine. *J Am Coll Cardiol.* 2007;50(7):e1–e157.
13. Adams HP, del Zoppo G, Alberts MJ, et al. Guidelines for the early management of adults with ischemic stroke: a guideline from the American Heart Association/American Stroke Association Stroke Council, Clinical Cardiology Council, Cardiovascular Radiology and Intervention Council, and the Atherosclerotic Peripheral Vascular Disease and Quality of Care Outcomes in Research Interdisciplinary Working Groups: the American Academy of Neurology affirms the value of this guideline as an educational tool for neurologists. *Stroke.* 2007;38(5):1655–1711.
14. Dellinger RP, Levy MM, Carlet JM, et al. Surviving Sepsis Campaign: international guidelines for management of severe sepsis and septic shock: 2008. In: Vol 36. 2008:296–327.
15. Rivers E, Nguyen B, Havstad S, et al. Early goal-directed therapy in the treatment of severe sepsis and septic shock. *N Engl J Med.* 2001;345(19):1368–1377.
16. Rivers EP, Coba V, Whitmill M. Early goal-directed therapy in severe sepsis and septic shock: a contemporary review of the literature. *Curr Opin Anaesthesiol.* 2008;21(2):128–140.
17. Singer, M., Deutschman, C. S., Seymour, C. W., et al. The Third International Consensus Definitions for Sepsis and Septic Shock (Sepsis-3). *JAMA : the Journal of the American*



- 1  
2  
3 Medical Association, 2016;315(8), 801–810.  
4  
5  
6 18. Patton MQ. *Qualitative Research & Evaluation Methods*. SAGE Publications; 2014.  
7  
8  
9 19. Miles MB, Huberman AM, Saldaña J. *Qualitative Data Analysis*. SAGE Publications,  
10 Incorporated; 2013.  
11  
12  
13  
14 20. Swanwick, T. (Ed.). *Understanding Medical Education*. Oxford, UK: John Wiley & Sons,  
15 Ltd; 2013.  
16  
17  
18  
19 21. Wenger, E. (1999). *Communities of Practice*. Cambridge University Press.  
20  
21  
22 22. Preskill H, Torres RT. *Evaluative Inquiry for Learning in Organizations*. Thousand Oaks,  
23 CA: SAGE; 1999.  
24  
25  
26  
27 23. Creswell JW. *Educational Research: Planning, Conducting, and Evaluating Quantitative  
28 and Qualitative Research*. Boston, MA: Pearson; 2012.  
29  
30  
31  
32 24. Creswell JW, Hanson WE, Plano VLC, Morales A. Qualitative Research Designs Selection  
33 and Implementation. *The Counseling Psychologist*. 2007;35(2):236–264.  
34  
35  
36  
37 25. Hennink M, Hutter I, Bailey A. *Qualitative Research Methods*. SAGE; 2010.  
38  
39  
40 26. Viera AJ, Garrett JM. Understanding interobserver agreement: the kappa statistic. *Fam Med*.  
41 2005;37(5):360–363.  
42  
43  
44  
45 27. Cama R. *Evidence-Based Healthcare Design*. Hoboken, NJ: John Wiley & Sons, Inc.; 2009.  
46  
47  
48 28. White, A. *Continuous Quality Improvement*. London, UK: Piatkus Books; 1996.  
49  
50  
51 29. Yerkes, R., & Dodson, J. The Dancing Mouse: A study in animal behavior. *Journal of  
52 Comparative Neurology & Psychology*. 1907; 18, pp.459-482.  
53  
54  
55  
56 30. Deci., E., & Ryan, M. *Intrinsic motivation and self-determination in human behavior*. New  
57  
58  
59  
60

- 1  
2  
3 York, NY: Plenum; 1985.  
4  
5  
6 31. Deci, E., & Ryan, M. The support of autonomy and control of behavior. *Journal of*  
7  
8 *Personality and Social Psychology*. 1987;53:1024-1037.  
9  
10  
11 32. Emerson, RM (1987). Toward a theory of value in social exchange. *Social exchange*  
12  
13 *theory*, 11, 46.  
14  
15  
16 33. Bone PF. Word-of-mouth effects on short-term and long-term product judgments. *Journal of*  
17  
18 *Business Research*. 1995;32(3):213–223.  
19  
20  
21 34. Gilly MC, Graham JL, Wolfenbarger MF, Yale LJ. A Dyadic Study of Interpersonal  
22  
23 Information Search. *Journal of the Academy of Marketing Science*. 1998;26(2):83–100.  
24  
25  
26 35. Bansal HS, Voyer PA. Word-of-Mouth Processes within a Services Purchase Decision  
27  
28 Context. *Journal of Service Research*. 2000;3(2):166–177.  
29  
30  
31 36. Lau GT, Ng S. Individual and Situational Factors Influencing Negative Word-of-Mouth  
32  
33 Behaviour. *Canadian Journal of Administrative Sciences / Revue Canadienne des Sciences*  
34  
35 *de l'Administration*. 2001;18(3):163–178.  
36  
37  
38 37. Van Hove G, Lievens F. Tapping the grapevine: a closer look at word-of-mouth as a  
39  
40 recruitment source. *J Appl Psychol*. 2009;94(2):341–352.  
41  
42  
43 38. Feldman JM, Lynch JG. Self-generated validity and other effects of measurement on belief,  
44  
45 attitude, intention, and behavior. *Journal of Applied Psychology*. 1988;73(3):421–435.  
46  
47  
48 39. Herr PM, Kardes FR, Kim J. Effects of Word-of-Mouth and Product-Attribute Information  
49  
50 on Persuasion: An Accessibility-Diagnosticity Perspective. *Journal of Consumer Research*.  
51  
52 1991;17(4):454.  
53  
54  
55 40. Rivera MT, Soderstrom SB, Uzzi B. Dynamics of Dyads in  
56  
57  
58  
59  
60

- 1  
2  
3 Social Networks: Assortative, Relational, and Proximity Mechanisms. *Annu Rev Sociol.*  
4  
5 2010;36:91–115.  
6  
7  
8  
9 41. Newman ME. Clustering and preferential attachment in growing networks. *Phys Rev E Stat*  
10 *Nonlin Soft Matter Phys.* 2001;64(2 Pt 2):025102.  
11  
12  
13 42. Burt RS. Decay functions. *Social Networks.* 2000;22(1):1–28.  
14  
15  
16 43. Martin JL, Yeung K-T. Persistence of close personal ties over a 12-year period. *Social*  
17 *Networks.* 2006;28(4):331–362.  
18  
19  
20  
21 44. Northouse PG. *Leadership.* SAGE Publications; 2012.  
22  
23  
24 45. Coates H. The value of student engagement for higher education quality assurance. *Quality*  
25 *in Higher Education.* 2005;11(1):25–36.  
26  
27  
28  
29 46. Parsons J, Taylor L. *Student engagement: What do we know and what should we do?* 2011.  
30  
31 Available at:  
32  
33 [https://education.alberta.ca/media/6459431/student\\_engagement\\_literature\\_review\\_2011](https://education.alberta.ca/media/6459431/student_engagement_literature_review_2011).  
34  
35 Accessed October 10, 2014.  
36  
37  
38  
39  
40  
41  
42  
43  
44  
45  
46  
47  
48  
49  
50  
51  
52  
53  
54  
55  
56  
57  
58  
59  
60

1  
2  
3  
4  
5 **List of Figures:**  
6

7 Figure 1. Conceptual Framework  
8  
9  
10  
11  
12  
13  
14  
15  
16  
17  
18  
19  
20  
21  
22  
23  
24  
25  
26  
27  
28  
29  
30  
31  
32  
33  
34  
35  
36  
37  
38  
39  
40  
41  
42  
43  
44  
45  
46  
47  
48  
49  
50  
51  
52  
53  
54  
55  
56  
57  
58  
59  
60

For peer review only

1  
2  
3  
4  
5  
6  
7  
8  
9  
10  
11  
12  
13  
14  
15  
16  
17  
18  
19  
20  
21  
22  
23  
24  
25  
26  
27  
28  
29  
30  
31  
32  
33  
34  
35  
36  
37  
38  
39  
40  
41  
42  
43  
44  
45  
46  
47  
48  
49  
50  
51  
52  
53  
54  
55  
56  
57  
58  
59  
60

**List of Tables:**

Table 1. Characteristics of interview participants.

Table 2. Summary of the qualitative findings.

For peer review only

1  
2  
3  
4 **List of Supplemental Online Content**  
5  
6

7 Appendix S1. Interview Guides.  
8  
9  
10  
11  
12  
13  
14  
15  
16  
17  
18  
19  
20  
21  
22  
23  
24  
25  
26  
27  
28  
29  
30  
31  
32  
33  
34  
35  
36  
37  
38  
39  
40  
41  
42  
43  
44  
45  
46  
47  
48  
49  
50  
51  
52  
53  
54  
55  
56  
57  
58  
59  
60

For peer review only

1  
2  
3  
4  
5  
6  
7  
8  
9  
10  
11  
12  
13  
14  
15  
16  
17  
18  
19  
20  
21  
22  
23  
24  
25  
26  
27  
28  
29  
30  
31  
32  
33  
34  
35  
36  
37  
38  
39  
40  
41  
42  
43  
44  
45  
46  
47  
48  
49  
50  
51  
52  
53  
54  
55  
56  
57  
58  
59  
60

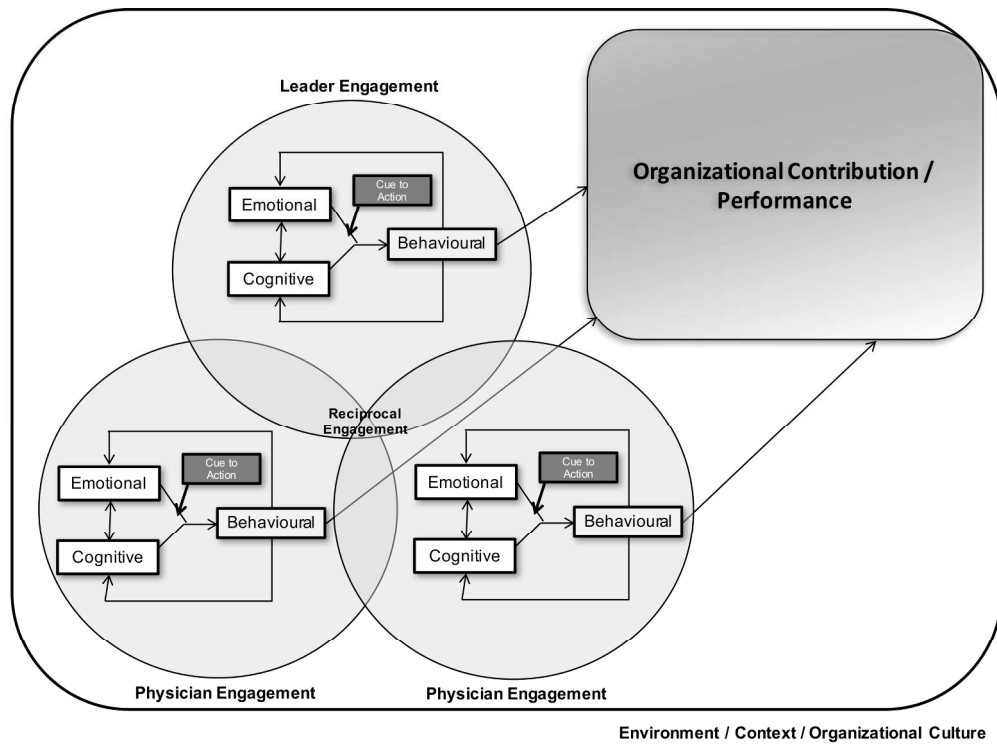

Figure 1. Conceptual Framework

215x161mm (300 x 300 DPI)

ew only

**Table 1. Characteristics of interview participants.**

| <b>Characteristic</b>   | <b>n</b> | <b>%</b> |
|-------------------------|----------|----------|
| Number                  | 30       |          |
| Region *                |          |          |
| Mountain                | 7        | 23       |
| Prairies                | 3        | 10       |
| Ontario                 | 14       | 47       |
| Quebec                  | 2        | 7        |
| Atlantic                | 4        | 13       |
| Specialty/Discipline ** |          |          |
| Critical Care           | 23       | 77       |
| Anesthesia              | 7        | 23       |
| Internal Medicine       | 5        | 17       |
| Surgery                 | 3        | 10       |
| Family Medicine         | 3        | 10       |
| Nurses                  | 2        | 7        |
| Respiratory Therapists  | 2        | 7        |
| Pediatric Critical Care | 1        | 3        |

\* The regions of Canada have been divided in the following way: Mountain includes British Columbia and Alberta; Prairies include Saskatchewan and Manitoba; Atlantic includes all Atlantic Provinces.

\*\* Individuals were classified under their current practice specialties. Note that an individual may be practicing in more than one specialty.



Table 2: Summary of the qualitative findings.

|                                            |
|--------------------------------------------|
| <b>1. Volunteer Recruitment</b>            |
| a. Word of mouth                           |
| b. Snowball approach                       |
| c. Career stage                            |
| <b>2. Volunteer Retention</b>              |
| a. Distributed leadership and career paths |
| b. Program change and evolution/innovation |
| c. Comfort zone                            |
| d. Reciprocal engagement                   |
| e. Intrinsic motivation                    |
| f. Learners                                |
| g. Barriers                                |
| <b>3. Volunteer Exchange</b>               |
| a. Career opportunities                    |
| b. Keep current                            |
| c. Academic currency                       |
| <b>4. Volunteer Recognition</b>            |
| a. Personal recognition                    |
| b. Scholarly/academic work                 |
| <b>5. Educator Network</b>                 |
| a. Common vision                           |
| b. Duration or participation/loyalty       |
| c. Affect                                  |
| <b>6. Quasi Volunteerism</b>               |
| a. Academic pressure                       |
| b. Curriculum vitae                        |

## Interview Guide 1

### Introduction

#### 1. Introduction

Thanks for agreeing to participate ... We are conducting a needs assessment for the ACES course (introduce the project). Consent.

#### 2. Background

- a. Goal of the ACES course - provide the learner with the necessary knowledge, skills and attitude to recognize and manage a patient who is acutely and critically ill in the first hour of presentation
- b. Modality of the ACES course - multimodal: e-learning, book, case seminars, technical skill workshop, simulation, and bedside tools

#### 3. Purpose of the needs assessment

- a. Interest expressed by various groups to customize the ACES course to a specific population
- b. Facilitate the dissemination of the course across Canada
- c. Exploring interest in an interprofessional course
- d. Explore business models that would facilitate dissemination
- e. Explore peer-review process and means of promoting academic contributions of faculty

#### 4. Please let us know if you are NOT in a position to answer some of the questions (e.g. vice-dean discussing weaknesses of residents during resuscitation)

#### 5. Interview will be recorded; all information will be kept confidential

### Demographics

1. What is your professional designation?
2. What are your current roles?
3. Can you let me know what type of institution you work in (Community Hospital, Secondary, Tertiary, and Quaternary)?
4. When it comes to responding to a crisis, what is the usual makeup of the team in your institution?
5. Are you familiar with the ACES course? Have you participated or taught an ACES course?

### Content

1. When it comes to responding to a crisis, what are the team's strengths?
2. When it comes to responding to a crisis, what are team's weaknesses?
3. Probes
  - a. What about (mention any members of the team that have not been addressed)

- 1
  - 2
  - 3
  - 4
  - 5
  - 6
  - 7
  - 8
  - 9
  - 10
  - 11
  - 12
  - 13
  - 14
  - 15
  - 16
  - 17
  - 18
  - 19
  - 20
  - 21
  - 22
  - 23
  - 24
  - 25
  - 26
  - 27
  - 28
  - 29
  - 30
  - 31
  - 32
  - 33
  - 34
  - 35
  - 36
  - 37
  - 38
  - 39
  - 40
  - 41
  - 42
  - 43
  - 44
  - 45
  - 46
  - 47
  - 48
  - 49
  - 50
  - 51
  - 52
  - 53
  - 54
  - 55
  - 56
  - 57
  - 58
  - 59
  - 60
4. At the end of the course, the learner should be able to..... (Please list the 5 most important performance objectives)
  5. Is there anything else that you can think of that we have not discussed?

### Course format

1. Do you think that pre-course on-line content would be useful?
  - a. Do you anticipate that you or your learners may have any problems accessing online material?
  - b. What is the purpose of having pre-course on-line content?
    - i. Teaching knowledge, decision-making, other?
    - ii. Preparation for the face-to-face course
    - iii. Assessment of learners?
    - iv. Others
  - c. What should be the duration of a pre-course on-line session?
  - d. Should the pre-course on-line content be mandatory?
    - i. If so, can you think of ways to ensure your or your learners compliance with mandatory online content?
2. Do you think that post-course on-line content would be useful?
  - a. Would it be useful for you to have access to the pre-course on-line content after the course for further revision? How long?
  - b. What is the purpose of having post-course on-line content?
    - i. Teaching knowledge, decision-making, other?
    - ii. Preparation for the face-to-face course
    - iii. Assessment of learners?
    - iv. Post-course assessment of knowledge retention
    - v. Others
  - c. What should be the duration of an on-line session?
    - i. Post face-to-face course
  - d. Should post-course on-line content be mandatory?
    - i. If so, can you think of ways to ensure your or your learners compliance with mandatory online content?
3. Do you think that the program should have a face-to-face course?
  - a. How long should the course be?
  - b. What should be the preferred modalities?
    - a. Simulation?
    - b. Case-based seminars?
    - c. Technical skills workshops?
    - d. Didactic lecture?

- 1
  - 2
  - 3
  - 4
  - 5
  - 6
  - 7
  - 8
  - 9
  - 10
  - 11
  - 12
  - 13
  - 14
  - 15
  - 16
  - 17
  - 18
  - 19
  - 20
  - 21
  - 22
  - 23
  - 24
  - 25
  - 26
  - 27
  - 28
  - 29
  - 30
  - 31
  - 32
  - 33
  - 34
  - 35
  - 36
  - 37
  - 38
  - 39
  - 40
  - 41
  - 42
  - 43
  - 44
  - 45
  - 46
  - 47
  - 48
  - 49
  - 50
  - 51
  - 52
  - 53
  - 54
  - 55
  - 56
  - 57
  - 58
  - 59
  - 60
- e. Other?
  - c. What should be the relative proportion of time spent for each modality?
    - a. Simulation?
    - b. Case-based seminars?
    - c. Technical skills workshops?
    - d. Didactic lecture?
    - e. Other?
  - d. Should the pre-course material be reviewed during the face-to-face course?
  - e. What should determine the instructor to participant ratio?
    - a. Simulation?
    - b. Case-based seminars?
    - c. Technical skills workshops?
    - d. Didactic lecture?
    - e. Other?
  - f. Tell me what you think about making this course interprofessional...
    - a. What would be the advantages?
    - b. What would be the challenges?
4. How complicated is it for your institution/organization to organize a course that contains a large components of simulation training?
- a. Do you have access to simulation laboratory with the required equipment?
  - b. Do you have access to simulation engineer
  - c. Do you have trained instructors
  - d. Do you have course co-coordinators with experience delivering such courses

### Market analysis

1. What do you like most about the ACES course?
2. What changes would most improve the ACES course?
3. Do you know of competing courses currently available?
4. What do you like the most about these other courses?
5. What changes would most improve these other courses?
6. If you are not likely to deliver the ACES course, why not?
7. What would make you more likely to deliver the ACES course?
  - a. Is costing an issue?
  - b. Are difficulties delivering the ACES course an issue?
    - i. Low participants to instructor ratio
    - ii. Space
    - iii. Equipment

- 1  
2  
3                   iv. Personnel (simulation engineer, trained actors, course coordinator)  
4  
5                   8. Imagine that you are tasked to widely disseminate this course in order to improve  
6                   patient care. Can you think of a business model that would favor wide  
7                   dissemination?  
8  
9                   a. Keeping in mind that there is a cost related to the development and  
10                  dissemination of the material.  
11

### 12 Peer review process

- 13  
14                  1. Do you have any suggestions on how to best organize and facilitate the peer-  
15                  review process?  
16                  a. Initially  
17                  b. On an ongoing process  
18  
19

### 20 Recognition

- 21                  1. How could the Royal College best recognize your or your institution's  
22                  contributions in the creation and delivery of the ACES course?  
23                  a. Would it help if creators were informed of their material evaluations and  
24                  extent of dissemination? How often?  
25                  b. Would including the sums invested in the completion of the project be  
26                  useful as a means of recognition?  
27  
28  
29  
30  
31  
32  
33  
34  
35  
36  
37  
38  
39  
40  
41  
42  
43  
44  
45  
46  
47  
48  
49  
50  
51  
52  
53  
54  
55  
56  
57  
58  
59  
60

## Interview Guide 2

### Volunteer Engagement in the ACES program

- Target – Leadership within the organization and some Volunteer Physicians
- Introduction, Confidentiality, Consent

### Leadership Questions:

1. What is your role in the ACES program?
2. How do volunteers impact the program? Has this changed over the years / history of the program?
3. Who are the volunteers?
4. Where are they located?
5. What roles do volunteers perform?
  - a. *Probe – development, delivery, administration, promotion of the program, etc. Specifically link to the conceptual framework*
6. Are there more ways that you envision them being involved?
7. Why do you think physicians volunteer their time with the ACES program?
  - a. *Probes: To be completed -*
    - i. *Behavioural*
    - ii. *Emotional*
    - iii. *Cognitive*
      1. *The challenge of the activity? Or mastering challenging / difficult ideas/skills/tasks?*
8. How are they currently recruited?
9. What are the barriers to recruitment and retention of volunteers?
10. What are the facilitators to recruitment and retention of volunteers?
11. How are they rewarded/appreciated for their contribution?
12. How do you see the ACES program evolving and how will this impact the volunteers? Impact the need for volunteers?
13. If a need for more volunteers is identified - Any solutions to increasing capacity and retention?

### Questions regarding your volunteer involvement

14. Do you volunteer time with the ACES program?
15. What activities / role do you perform as a volunteer?
16. Why do you volunteer?
17. How is your contribution acknowledged?

**Volunteer Questions:**

1. What is your role in the ACES program?
2. How long have you been a volunteer with ACES?
3. How did you become involved with ACES?
4. Why do you volunteer?
  - a. *Probes:*
    - i. *Behavioural*
    - ii. *Emotional*
    - iii. *Cognitive*
      1. *Do find this work challenging? by the activity and or your involvement? Or mastering challenging / difficult ideas/skills/tasks?*
  - b. What specifically – ie, what part is challenging? What part do you ‘love’? what part are you most ‘interested’ in?
5. Have you ever considered increasing your involvement with ACES?
6. Have you ever considered decreasing or discontinuing your involvement with ACES?
7. Are there factors that maintain your involvement with ACES?
8. What improvements could be made to better meet your needs as a volunteer with the organization?

## COREQ Checklist for Qualitative Study.

### Domain 1: Research team and reflexivity

#### Personal Characteristics

##### 1. Interviewer/facilitator - Which author/s conducted the interview or focus group?

- A.S., S.S., A.L.

##### 2. Credentials - What were the researcher's credentials?

- A.S.: MD, MEd
- S.S.: PhD
- A.L.: RN, BScN.

##### 3. Occupation - What was their occupation at the time of the study?

- A.S. – Intensivist / Clinical Scholar, The Ottawa Hospital; Clinician Investigator in the Clinical Epidemiology Program (CEP) at the Ottawa Hospital Research Institute (OHRI)
- S.S. Research consultant for The Department of Critical Care, The Ottawa Hospital
- A.L. – Instructional/Curriculum Designer at the Royal College of Physicians and Surgeons of Canada; practicing Critical Care nurse in a tertiary Intensive Care Unit

##### 4. Gender - Was the researcher male or female?

- All interviewers were female

##### 5. Experience and training - What experience or training did the researcher have?

- A.S. was in her second year of a clinical scholars program. She completed a fellowship with the Academy for Innovation in Medical Education at the University of Ottawa, and was a Masters of Health Professionals Education Candidate, University of Dundee, Scotland. She had performed numerous qualitative and mixed method investigations.
- S.S. has expertise in mixed methods research with an MA (Hons.) in measurement and evaluation, and a PhD in educational research, with 20 years of research and evaluation experience.
- A.L. has gained experience in conducting needs assessment (using interviews, focus groups and walkthrough) for the development of educational material as part of her occupation and was in the process of completing her Masters of Education (MA Ed) which included graduate level courses in qualitative methods. She had also received training in interviewing skills.
- Co-authors experienced in both quantitative and qualitative research, medical education, palliative and critical care.

#### Relationship with participants



1  
2  
3 6. Relationship established - Was a relationship established prior to study commencement?  
4

- 5  
6
- No.

7  
8 7. Participant knowledge of the interviewer - What did the participants know about the researcher?  
9

- 10
- Participants were aware of the rationale for the study and the researcher's level of training.

11  
12 8. Interviewer characteristics - What characteristics were reported about the interviewer/facilitator?  
13

- 14
- The interviewer's level of training and occupation were reported.

15  
16  
17 Domain 2: Study design

18  
19 Theoretical framework

20  
21 9. Methodological orientation and Theory - What methodological orientation was stated to underpin the  
22 study?  
23

- 24
- Qualitative investigation with constructivism as guiding theoretical framework.

25  
26  
27 Participant selection

28  
29 10. Sampling - How were participants selected?  
30

- 31
- Purposive, snowball sampling.

32  
33 11. Method of approach - How were participants approached?  
34

- 35
- Email and telephone.

36  
37 12. Sample size - How many participants were in the study?  
38

- 39
- 30 interviews

40  
41 13. Non-participation- How many people refused to participate or dropped out? Reasons?  
42

- 43
- 0

44  
45  
46 Setting

47  
48 14. Setting of data collection - Where was the data collected?  
49

- 50
- Telephone interviews

51  
52 15. Presence of non-participants Was anyone else present besides the participants and researchers?  
53

- 54
- No

55  
56  
57 16. Description of sample - What are the important characteristics of the sample?  
58  
59  
60

- Secondary qualitative analysis was undertaken on fifteen semi-structured interviews with participants, including program directors and health care professionals across Canada. An additional fifteen interviews with physician volunteers were conducted to achieve thematic saturation.

#### Data collection

17. Interview guide - Were questions, prompts, guides provided by the authors? Was it pilot tested?

- Semi structured guides were developed for the focus groups, interviews, and walkthroughs, with probes to guide as necessary. All tools were pilot tested prior to use in this study.

18. Repeat interviews - Were repeat interviews carried out?

- No.

19. Audio/visual recording - Did the research use audio or visual recording to collect the data?

- Interviews were audio recorded and transcribed.

20. Field notes - Were field notes made during and/or after the interview or focus group?

- Yes, both during and after.

21. Duration - What was the duration of the interviews or focus group?

- Interviews were approximately 1 hour.

22. Data saturation - Was data saturation discussed?

- Yes

23. Transcripts returned - Were transcripts returned to participants for comment and/or correction?

- No, the transcripts were not returned to the participants. To ensure accuracy of transcriptions, each transcript was verified with the audio recordings prior to data analysis.

#### Domain 3: Analysis and findings

##### Data analysis

24. Number of data coders - How many data coders coded the data?

- Three researchers coded the data

25. Description of the coding tree - Did authors provide a description of the coding tree?

- No. Available upon request.

1  
2  
3 26. Derivation of themes - Were themes identified in advance or derived from the data?  
4

- 5 • Inductive – Themes were derived from the data  
6  
7

8 27. Software - What software, if applicable, was used to manage the data?  
9

- 10 • Yes, NVIVO  
11

12 28. Participant checking - Did participants provide feedback on the findings?  
13

- 14 • No  
15  
16

17 Reporting

18 29. Quotations presented - Were participant quotations presented to illustrate the themes / findings?  
19 Was each quotation identified?  
20

- 21 • Yes  
22  
23

24 30. Data and findings consistent - Was there consistency between the data presented and the findings?  
25

- 26 • Yes  
27  
28

29 31. Clarity of major themes - Were major themes clearly presented in the findings?  
30

- 31 • Yes  
32

33 32. Clarity of minor themes - Is there a description of diverse cases or discussion of minor themes?  
34

- 35 • Yes  
36  
37  
38  
39  
40  
41  
42  
43  
44  
45  
46  
47  
48  
49  
50  
51  
52  
53  
54  
55  
56  
57  
58  
59  
60

# BMJ Open

## Exploring the components of physician volunteer engagement: a qualitative investigation of a national Canadian simulation based training program

|                                 |                                                                                                                                                                                                                                                                                                                                                                                                                                                                                         |
|---------------------------------|-----------------------------------------------------------------------------------------------------------------------------------------------------------------------------------------------------------------------------------------------------------------------------------------------------------------------------------------------------------------------------------------------------------------------------------------------------------------------------------------|
| Journal:                        | <i>BMJ Open</i>                                                                                                                                                                                                                                                                                                                                                                                                                                                                         |
| Manuscript ID                   | bmjopen-2016-014303.R2                                                                                                                                                                                                                                                                                                                                                                                                                                                                  |
| Article Type:                   | Research                                                                                                                                                                                                                                                                                                                                                                                                                                                                                |
| Date Submitted by the Author:   | 19-Apr-2017                                                                                                                                                                                                                                                                                                                                                                                                                                                                             |
| Complete List of Authors:       | Sarti, Aimee J.; Ottawa Hosp, Critical Care<br>Sutherland, Stephanie; Ottawa Hosp, Critical Care<br>Landriault, Angele; Royal College of Physicians and Surgeons of Canada (RCPSC), Practice, Performance and Innovation (PPI) unit<br>DesRosier, Kirk; Royal College of Physicians and Surgeons of Canada (RCPSC), Practice, Performance and Innovation (PPI) unit<br>Brien, Susan; Royal College of Physicians and Surgeons of Canada<br>Cardinal, Pierre; Ottawa Hosp, Critical Care |
| <b>Primary Subject Heading</b>: | Medical education and training                                                                                                                                                                                                                                                                                                                                                                                                                                                          |
| Secondary Subject Heading:      | Intensive care, Qualitative research                                                                                                                                                                                                                                                                                                                                                                                                                                                    |
| Keywords:                       | Physicians, Volunteers, QUALITATIVE RESEARCH, MEDICAL EDUCATION & TRAINING                                                                                                                                                                                                                                                                                                                                                                                                              |
|                                 |                                                                                                                                                                                                                                                                                                                                                                                                                                                                                         |

SCHOLARONE™  
Manuscripts

only

1  
2  
3  
4  
5  
6  
7

## Exploring the components of physician volunteer engagement: a qualitative investigation of a national Canadian simulation based training program

8  
9  
10  
11  
12

Sarti, Aimee J. MD; Sutherland, Stephanie PhD; Landriault, Angele BScN; DesRosier, Kirk; Brien, Susan MD, MEd; Cardinal, Pierre MD, MScEpi

13

### Affiliations:

14  
15  
16  
17  
18

Dr. Sarti is a clinical scholar, The Ottawa Hospital, Department of Medicine, Division of Critical Care; research collaborator with The Royal College of Physicians and Surgeons of Canada (RCPSC); Practice, Performance and Innovation (PPI) unit;

19  
20  
21  
22  
23

Dr. Sutherland is an educational research consultant with expertise in research methodology and program evaluation, Department of Innovation in Medical Education, University of Ottawa (DIME), Ontario, Canada.

24  
25  
26  
27

Ms. Landriault manager for the Royal College of Physicians and Surgeons of Canada (RCPSC), Practice, Performance and Innovation (PPI) unit, Ottawa, Ontario, Canada.

28  
29  
30  
31

Mr. DesRosier is an instructional designer and evaluator for the Royal College of Physicians and Surgeons of Canada (RCPSC), Practice, Performance and Innovation (PPI) unit, Ottawa, Ontario, Canada.

32  
33  
34  
35  
36

Dr. Brien is the Director of Practice and Systems Innovation and Practice, Performance and Innovation, as well as VP Asia Pacific with Royal College International (RCI), at the Royal College of Physicians and Surgeons of Canada (RCPSC).

37  
38  
39  
40  
41  
42

Dr. Cardinal is professor, the University of Ottawa, Department of Medicine, Division of Critical Care; Senior clinical scholar, The Royal College of Physicians and Surgeons of Canada (RCPSC); Practice, Performance and Innovation (PPI) unit, Ottawa, Ontario, Canada.

43

### Corresponding Author:

44

Aimee Sarti MD

45  
46  
47

The Royal College of Physicians and Surgeons of Canada (RCPSC), Practice, Performance and Innovation (PPI) Unit

48

774 Echo Drive, Ottawa, Ontario, Canada, K1S 5N8

49

Telephone – 613-730-8177 ext 599

50

Fax – 613-730-2410

51  
52

Email – [asarti@toh.on.ca](mailto:asarti@toh.on.ca)

53  
54  
55  
56  
57  
58  
59  
60

**Key Words:** volunteer, engagement, qualitative research, medical education, critical care

## Abstract

**Objectives:** Conceptual clarity on physician volunteer engagement is lacking in the medical literature. The aim of this study was to present a conceptual framework to describe the elements which influence physician volunteer engagement and to explore volunteer engagement within a national educational program.

**Setting:** The context for this study was the Acute Critical Events Simulation (ACES) program in Canada, which has successfully evolved into a national educational program, driven by physician volunteers. From 2010 to 2014 the program recruited 73 volunteer health care professionals who contributed to the creation of educational materials and/or served as instructors.

**Method:** A conceptual framework was constructed based on an extensive literature review and expert consultation. Secondary qualitative analysis was undertaken on fifteen semi-structured interviews conducted from 2012 to 2013 with program directors and health care professionals across Canada. An additional fifteen interviews were conducted in 2015 with physician volunteers to achieve thematic saturation. Data was analyzed iteratively and inductive coding techniques applied.

**Results:** From the physician volunteer data, eleven themes emerged. The most prominent themes included volunteer recruitment, retention, exchange, recognition, educator network, and quasi volunteerism. Captured within these interrelated themes were the framework elements, including the synergistic effects of emotional, cognitive and reciprocal engagement. Behavioural engagement was driven by these factors along with a cue to action, which led to contributions to the ACES program.

**Conclusion:** This investigation provides a preliminary framework and supportive evidence towards understanding the complex construct of physician volunteer engagement. The need for this research is particularly important in present day, where growing fiscal constraints create challenges for medical education to do more with less.

## **Article Summary**

### **Strengths and limitations of this study**

- First study to synthesize key elements of physician volunteer engagement into a conceptual framework.
- Covers an under-investigated issue and draws upon a wider theoretical background.
- Qualitative data obtained provides new insights into physician volunteer engagement, which may offer practical ideas to improve volunteer engagement strategies.
- Our findings were obtained in one country, within one national program.
- Explored volunteer engagement in a highly engaged group of physicians, study was not able to explore disengagement.

## Introduction

Physician volunteers are essential to health care delivery and medical education.<sup>1</sup>

Despite the growing need to optimize volunteer physician engagement, there is a paucity of data on how to improve and maintain engagement. Volunteerism can be defined as any altruistic act, which is undertaken without financial gain while engagement has been defined as being “actively committed” or “to involve oneself or become occupied; to participate.”<sup>2,3</sup>

Physicians appear to highly value their role as volunteers. In a US study by Gruen et al., 95 % of physicians surveyed rated community participation as important”.<sup>4</sup> Yet, in a national survey of 319 physicians, only 39% participated in volunteer activities.<sup>5</sup>

Therefore, there appears to be a wide gap between the perceived importance of volunteering and its translation into action or engagement. Such studies illustrate the need to better understand the determinants of physician volunteer engagement and the ways in which it can be optimized.

Most of the medical literature on engagement is centered on the patient and behaviors that promote health. A few isolated studies focusing on physician engagement were identified but there is currently no accepted model describing the multifaceted dimensions of physician volunteer engagement.<sup>6-10</sup> We can draw from the social science literature in order to define and examine the various components of engagement.



1  
2  
3 The concept of engagement, specifically, school engagement has been synthesized in a  
4 review by Fredricks et al.<sup>11</sup> They present engagement as a multifaceted construct  
5 including three dynamically interrelated components: behavioural, emotional and  
6 cognitive engagement. Behavioural engagement is related specifically to the on task  
7 behavior. Emotional engagement is related to the value of the tasks as determined by the  
8 individual. Value is further divided into 4 components: “interest (enjoyment of the task),  
9 attainment value (importance of doing well on the task for confirming aspects of one’s  
10 self-schema), utility value (importance of the task for future goals), and cost (negative  
11 aspects of engaging in the task).”<sup>11</sup> Cognitive engagement refers to an individual’s  
12 motivational goals and self-regulated learning. This concept can be further described as a  
13 psychological investment in learning, understanding, and mastering knowledge or skills  
14 with a “desire to go beyond the requirements, and a preference for challenge.”<sup>11</sup>  
15  
16  
17  
18  
19  
20  
21  
22  
23  
24  
25  
26  
27  
28  
29  
30  
31  
32  
33

34 In this study, we sought to develop a conceptual framework to describe and explore the  
35 components and theoretical underpinnings of physician volunteer engagement. We  
36 began our investigation with a secondary analysis of a comprehensive needs assessment  
37 in a quality improvement initiative aimed at the overall enhancement of the Acute  
38 Critical Events Simulation (ACES) program. Later, we extended this initial work by  
39 obtaining additional data to provide evidence towards understanding the complex  
40 construct of physician volunteer engagement.  
41  
42  
43  
44  
45  
46  
47  
48  
49  
50  
51  
52

### 53 **Context**

54  
55  
56  
57  
58  
59  
60

1  
2  
3 The ACES Program is a national educational program aimed at improving the proficiency  
4 of individuals and teams involved in the early management of critically ill patients.  
5

6  
7  
8 Nurses, respiratory therapists, and physicians who are the first to respond to a patient in  
9 crisis come from various disciplines and practice in diverse milieus. Their experience  
10 managing acutely ill patients is often very limited given the low incidence of critical  
11 illness. Yet, clinical studies indicate that early recognition and management are most  
12 effective in lowering both morbidity and mortality. Randomized controlled trials and  
13 guidelines emphasize the importance of the 'golden-hour' in patients with conditions such  
14 as myocardial infarction, stroke, and sepsis.<sup>12-17</sup> The ACES program includes various  
15 simulation modalities delivered online or face-to-face as well as books and didactic  
16 material. It also includes instructor certification courses. Most of the educational  
17 materials have been customized to meet the needs of different groups of learners.  
18  
19  
20  
21  
22  
23  
24  
25  
26  
27  
28  
29  
30  
31  
32  
33

34 This program was initially developed from the vision and efforts of a small collective of  
35 Canadian critical care physicians who volunteered their time and expertise. It has  
36 successfully evolved into a national educational program, has been acquired by the Royal  
37 College of Physicians and Surgeons of Canada (RCPSC), and continues to advance and  
38 grow. Volunteers remain fundamental to the ACES program. They create materials,  
39 organize courses, teach, and conduct research. From 2010 to 2014 the program recruited  
40 a total of 73 volunteers, 69 of whom were physicians. The need for volunteers is  
41 increasing due to greater demand, addition of new forms of simulation, growth of online  
42 curricula and anticipated movement to a competency-based program.  
43  
44  
45  
46  
47  
48  
49  
50  
51  
52  
53  
54  
55  
56  
57  
58  
59  
60

## Method

A conceptual framework was constructed; secondary analysis of the ACES quality improvement initiative data was performed; additional interviews were conducted; qualitative data collection was performed and analyzed iteratively.

### Conceptual Framework

A conceptual framework is meant to explain the key factors, constructs, or variables, and their presumed relationships to be studied.<sup>18,19</sup> An extensive literature review along with expert consultation informed the development of the framework. We opted for a more pre-structured qualitative research design as we wanted to bound the study within a set of engagement variables, yet at the same time we needed to maintain enough flexibility to allow for emergent findings so as to better understand the construct of physician engagement. We adapted a student engagement conceptual framework.<sup>11</sup> We found Fredericks et al.'s theory of engagement to be useful in our medical context. In further modifying the conceptual framework we used the 'bins approach,' whereby the framework is mostly a visual catalogue of roles to be studied (e.g., physician leaders and physicians), and within each role, how the variables of engagement influence their actions.<sup>19</sup> A multidisciplinary panel of experts iteratively collaborated on the modifications to the conceptual framework included critical care physicians and leaders, administrators, system-level policymakers and a sociologist.

We developed the model depicted in Figure 1, to explore volunteer physician engagement in a comprehensive manner. For our study, the physician behavior of participation as a

1  
2  
3 volunteer is the desired outcome. All other elements, which contribute and lead to this  
4  
5 behavior are under investigation. In this figure, we have depicted two physicians and one  
6  
7 leader for simplicity. In reality there may be many leaders and physicians. We define a  
8  
9 leader as an individual within the group who influences others towards a mutual purpose  
10  
11 or common goal.<sup>20</sup> We define an individual's engagement as a multidimensional  
12  
13 construct including emotional and cognitive engagement which ultimately can lead to  
14  
15 behavioral engagement, with tasks directed toward contributing to organizational  
16  
17 development and/or a specific domain, such as education, quality and safety, etc.<sup>11</sup>  
18  
19  
20  
21  
22  
23  
24  
25  
26  
27  
28

<insert Figure 1 about here>

29  
30 An individual's overall engagement is impacted by their demographic and psychosocial  
31  
32 characteristics. The emotional and cognitive components drive behavior. The  
33  
34 bidirectional arrows between these components indicates that the presence and/or  
35  
36 development of one component may impact the other. The behavior itself may further  
37  
38 promote the emotional and cognitive components and enhance volunteer behaviors  
39  
40 (indicated by the arrow back to the emotional and cognitive components). In addition,  
41  
42 the behavior requires a "cue to action" or trigger (which can be either intrinsic or  
43  
44 extrinsic to the individual). A simplistic example of an extrinsic "cue to action" may  
45  
46 involve the director of the program contacting a volunteer to participate.  
47  
48  
49  
50  
51  
52

53 Individual volunteers have the potential to impact each other and synergistically enhance  
54  
55 one another's engagement.' We have termed this variable "reciprocal engagement." This  
56  
57  
58  
59  
60

1  
2  
3 is akin to mutual engagement involving not only individual actions/attributes but also the  
4  
5 actions/attributes of others.<sup>21</sup> This relationship and enhanced engagement potential is  
6  
7 likely secondary to the impact on the individuals' emotional, cognitive and behavioral  
8  
9 components and/or may provide a trigger leading to the behavior.  
10  
11

12  
13  
14  
15 Leaders have their own intrinsic characteristics, emotional and cognitive components  
16  
17 which drive the behavior. Reciprocal engagement may also synergistically increase the  
18  
19 engagement of both the leader and individuals.  
20  
21

22  
23  
24 Ultimately, the behavioral engagement of the individual volunteers can lead to increased  
25  
26 organizational performance.<sup>22</sup> Sustainability of the volunteers likely depends on these  
27  
28 factors being maintained and may fluctuate for an individual over time with periods of  
29  
30 greater and lesser engagement, for example based on the presence or absence of a “cue to  
31  
32 action” and also based on changes in organizational culture, leadership and other  
33  
34 individuals.  
35  
36  
37  
38  
39  
40

### 41 **Data Collection and Analysis**

42  
43 As part of a quality improvement initiative of the ACES program, interviews were  
44  
45 conducted by AL between 2012 to 2013. Participant selection was carried out using  
46  
47 maximum variation purposive sampling to identify individuals that would provide a  
48  
49 balanced representation.<sup>23-25</sup> All participants were initially contacted by email or  
50  
51 telephone. Participants included program directors from different specialties and health  
52  
53 care professionals from different backgrounds. Upon analysis of this interview data the  
54  
55  
56  
57  
58  
59  
60

1  
2  
3 'physician as volunteer' theme was identified. To further explore this finding, and  
4  
5 achieve thematic saturation AS and SS performed additional telephone interviews with  
6  
7 physician volunteers in 2015.  
8  
9

10  
11  
12 Semi-structured interview guides were designed to follow a broad, pre-determined line of  
13  
14 inquiry that was flexible and that could evolve as data collection unfolded, permitting  
15  
16 exploration of emerging themes. Interview guides were created by an interdisciplinary  
17  
18 team of investigators with expertise in medical education, simulation, sociological and  
19  
20 qualitative research methods. Interview guides were piloted with a sub group of ACES  
21  
22 instructors who were not involved in the research study. None of the interviewers had a  
23  
24 relationship with any of the study participants prior to study commencement. Study  
25  
26 participants were made aware of the interviewers' level of training and organizational  
27  
28 affiliation(s). Interviews lasted from forty-five to sixty minutes, were audio-recorded, and  
29  
30 transcribed verbatim. (See Appendix S1, online for interview guides). The interviewers  
31  
32 (AS and SS) took ongoing field notes during the data collection process to aid in the  
33  
34 analysis phase.  
35  
36  
37  
38  
39  
40  
41  
42

43  
44 Qualitative data analysis of the comprehensive data set included the application of  
45  
46 inductive coding techniques, utilizing thematic content analysis, and NVIVO software for  
47  
48 data management.<sup>19,23</sup> The research team followed Creswell's coding process where data  
49  
50 is first explored to gain a general sense of the data and then coded. These codes were  
51  
52 described and collapsed into themes.<sup>23</sup> The analysis team consisted of 3 researchers (AS,  
53  
54 SS and AL) who participated in coding training and meetings to develop the coding tree  
55  
56  
57  
58  
59  
60

1  
2  
3 and codebook. The three researchers (AS, SS and AL) generated codes (from the same  
4  
5 interview transcripts) independently. Then, they engaged in consensus discussions.  
6  
7 Inter-rater reliability, assessed prior to independent coding, demonstrated a 95.73%  
8  
9 agreement and a 0.75 Kappa score which is considered to be substantial agreement.<sup>26</sup>  
10  
11 The volunteer construct was further explored and coded, through a more focused analytic  
12  
13 approach in order to gain an in-depth understanding of volunteer engagement.<sup>27</sup> In an  
14  
15 iterative process, additional interviews were performed to reach saturation of the  
16  
17 subthemes specific to volunteer engagement. To ensure the analysis process, and  
18  
19 subsequent themes were appropriate and reflected ACES facilitators/leaders views,  
20  
21 members of our research team who worked with the ACES program (PC and AL)  
22  
23 engaged in informal discussions with ACES members so as to vet the findings. This  
24  
25 study was granted an official exemption by The Ottawa Hospital Research Ethics Board.  
26  
27  
28  
29  
30  
31  
32  
33

## 34 **Results**

35  
36  
37 For the larger study (quality improvement initiative of the ACES program) 15 interviews  
38  
39 were performed to gain a broad and comprehensive understanding of the ACES program,  
40  
41 which included program directors and health care professionals across Canada;  
42  
43 physicians (n=11), nurses (n=2) and RTs (n=2) (interview guide 1). An additional 15  
44  
45 interviews of physician volunteers were performed (interview guide 2). Overall, thirty  
46  
47 of thirty-three invited individuals agreed to participate in the semi-structured interviews  
48  
49 for a response rate of 91%. All physician volunteers that were interviewed were full  
50  
51 time clinicians and members of the ACES faculty, who are called to participate as  
52  
53 needed. Participants are displayed in Table 1.  
54  
55  
56  
57  
58  
59  
60

**Table 1. Characteristics of interview participants.**

| Characteristic          | n  | %  |
|-------------------------|----|----|
| Number                  | 30 |    |
| Region *                |    |    |
| Mountain                | 7  | 23 |
| Prairies                | 3  | 10 |
| Ontario                 | 14 | 47 |
| Quebec                  | 2  | 7  |
| Atlantic                | 4  | 13 |
| Specialty/Discipline ** |    |    |
| Critical Care           | 23 | 77 |
| Anesthesia              | 7  | 23 |
| Internal Medicine       | 5  | 17 |
| Surgery                 | 3  | 10 |
| Family Medicine         | 3  | 10 |
| Nurses                  | 2  | 7  |
| Respiratory Therapists  | 2  | 7  |
| Pediatric Critical Care | 1  | 3  |

\* The regions of Canada have been divided in the following way: Mountain includes British Columbia and Alberta; Prairies include Saskatchewan and Manitoba; Atlantic includes all Atlantic Provinces.

\*\* Individuals were classified under their current practice specialties. Note that an individual may be practicing in more than one specialty.

To gain an in-depth understanding of the phenomenon of volunteer engagement, the data set was coded and 11 themes were identified and sub-coded. Of these themes, six interrelated themes – volunteer recruitment, volunteer retention, volunteer exchange, volunteer recognition, educator network, and quasi-volunteerism were most prominent in our data. A summary of the qualitative findings is presented in Table 2. Representative quotes are provided to illustrate each theme.

**Table 2: Summary of the qualitative findings.**

|                                 |
|---------------------------------|
| <b>1. Volunteer Recruitment</b> |
| a. Word of mouth                |
| b. Snowball approach            |



|    |                                      |
|----|--------------------------------------|
| 1  |                                      |
| 2  |                                      |
| 3  |                                      |
| 4  | c. Career stage                      |
| 5  | <b>2. Volunteer Retention</b>        |
| 6  | a. Distributed leadership and career |
| 7  | paths                                |
| 8  | b. Program change and                |
| 9  | evolution/innovation                 |
| 10 | c. Comfort zone                      |
| 11 | d. Reciprocal engagement             |
| 12 | e. Intrinsic motivation              |
| 13 | f. Learners                          |
| 14 | g. Barriers                          |
| 15 |                                      |
| 16 | <b>3. Volunteer Exchange</b>         |
| 17 | a. Career opportunities              |
| 18 | b. Keep current                      |
| 19 |                                      |
| 20 | c. Academic currency                 |
| 21 |                                      |
| 22 | <b>4. Volunteer Recognition</b>      |
| 23 | a. Personal recognition              |
| 24 | b. Scholarly/academic work           |
| 25 |                                      |
| 26 | <b>5. Educator Network</b>           |
| 27 | a. Common vision                     |
| 28 | b. Duration or participation/loyalty |
| 29 | c. Affect                            |
| 30 |                                      |
| 31 | <b>6. Quasi Volunteerism</b>         |
| 32 | a. Academic pressure                 |
| 33 | b. Curriculum vitae                  |

## Volunteer Recruitment

**Word of Mouth.** All recruitment was accomplished through word of mouth. That is, the cue to action was uniformly described by volunteers as an informal interaction with another volunteer, usually a leader who would call the volunteers to request their involvement.

I just got a call from him [ACES Director] one day, he introduced himself and talked about this program where a few guys were getting together and trying to do this thing and at that time there were, I don't know, about 6 or 7 guys and he asked if I wanted to be part of it.

**Snowball Approach.** A snowball approach was described by participants as a means of identifying and recruiting high quality volunteers. With this approach, leaders would

1  
2  
3 contact volunteers within the group, who in turn would reach out to contacts in their  
4  
5 social networks to identify potential new recruits who have the qualities required to  
6  
7 contribute to the group.  
8  
9

10  
11 What I would do is have more than one person get in touch with the person they  
12 are trying to recruit. First of all you want to cherry pick the people you want to  
13 recruit. It's just like a draft in sports or something. You want to cherry pick the  
14 people you want on your team and once you've earmarked certain people and say,  
15 "this person is not just strong clinically but also has great personal skills, is  
16 humble enough to listen to feedback, and to not get offended by it but to work  
17 with it."  
18

19  
20 **Career Stage.** Participants explored the different career stages of physicians who are  
21 recruited to volunteer with the program and felt that younger physicians are generally  
22 easier to recruit.  
23  
24  
25

26  
27 If it was in the middle part of their [physician] career, they may be on a certain  
28 track and it's difficult to engage them. I think it would be great if we could  
29 recruit people at mid-career because they have a bit more experience, a bit more  
30 knowledge about how things should work or how things should flow. On the  
31 other hand, if you recruit younger people, I think they are more enthusiastic and  
32 have completely new ideas and that's not a bad thing either right? For me, it was  
33 great to be involved early on but I was definitely a little shy to come forward with  
34 suggestions initially because, yeah, it's just a very established crowd.  
35  
36

### 37 38 **Volunteer Retention**

39  
40 **Distributed Leadership and Career Paths.** The organization embraces an open culture  
41 creating a collaborative environment, which allows for new leaders to be brought in and  
42 mentored by long standing leaders. This relationship enables long-standing leaders to  
43 remain involved with the program while balancing other career demands. In this way,  
44  
45  
46  
47  
48  
49  
50  
51 ACES is able to deepen its leadership base by distributing responsibilities to others.  
52

53  
54 I have decreased in participation, though I still remain section chair, well it is  
55 more of a co-chair position because I have a capable colleague who has taken  
56 over some of the curriculum development...I don't see myself in this role for  
57 perpetuity and so it's a good opportunity for people to transition and I think it's  
58  
59  
60

1  
2  
3 part of the natural transition process. I still remain involved and committed to  
4 being part of the National ACES Program and I still assist locally but I have  
5 decreased my involvement. It is more of a career choice and balancing the  
6 different aspects of my career that I've taken on as well.  
7  
8

9 **Program Change and Evolution.** The program's continual growth, ongoing  
10 modifications and innovative nature were described by volunteers as being very  
11 intellectually stimulating. This cognitive component was described by many participants  
12 as a major contributor to their initial and ongoing commitment and involvement with the  
13 program.  
14  
15  
16  
17  
18  
19

20  
21 I think the fact that we change and we grow is very important. If it was just the  
22 same program every year it will eventually become stagnant and people will lose  
23 interest.  
24

25  
26 **Comfort Zone.** Comfort zone is indicative of a behavioral state within which a person  
27 operates in an 'anxiety neutral' condition. The objective is to push or lead individuals  
28 beyond their comfort zone until comfort is achieved, which enables a consistent high-  
29 level performance. During their interviews volunteers were asked if they felt they were  
30 drawn to more challenging tasks. One physician put it like this,  
31  
32  
33  
34  
35  
36

37 So, why is it that you have to get out of your comfort zone? Why do you have to  
38 embark on a new mission or path that is quite challenging, one that there is no  
39 guarantee that it is going to work? I actually enjoy the process. I love working  
40 with others, I love creating things, and I love taking something that's just in the  
41 idea stage, and you know transforming it into something that's actually real.  
42  
43  
44

45 **Reciprocal Engagement.** Participants identified that a volunteer can enhance another  
46 volunteer's engagement and this process is cyclical. Participants further identified that  
47 interacting and connecting with students further enhanced their overall engagement.  
48  
49  
50

51  
52 It's amazing to go [to the ACES course] and see all these people giving their time  
53 because they love to teach and want people to do better. They are genuinely  
54 interested in the well-being of these fellows to be better doctors and it's catching  
55 you can't help but get your love of education back.  
56  
57  
58  
59  
60

1  
2  
3 **Intrinsic Motivation.** We use the psychological lens of motivation to underpin our  
4 understanding of intrinsic motivation. There is a fundamental distinction between actions  
5 that are self-determined and those that are controlled. The former, which reflects an  
6 individual's personal attributes and internal (intrinsic) motivation, was identified as  
7 contributing to the volunteers' participation in the program. The answer might be as  
8 simple as, 'I was built like that. This is who I am'. In fact, many described a strong  
9 internal drive to participate, hoping that they 'would be called' to action more frequently  
10 to perform tasks for the organization. Interestingly, participants spoke of a willingness  
11 to give more of their time, noting that financial incentives were of low to absent value in  
12 their activities with the ACES program. One participant described his experience like  
13 sitting on the bench waiting for the coach to call:  
14  
15  
16  
17  
18  
19  
20  
21  
22  
23  
24  
25  
26  
27  
28

29 I guess one of the biggest things as a volunteer, you're always somebody who is  
30 kind of on the bench and the coach may call you into play at any time. And, you  
31 kind of wonder if you're gonna get called off the bench to play...I love it and I  
32 love being invited back each time.  
33  
34

35 **Learners.** Fellows, often referred to as high-level learners by the volunteers, served as  
36 catalysts for both emotional and cognitive engagement in the ACES program. Some  
37 volunteers expressed the gratification they felt in teaching the next generation of  
38 intensivists, while others expressed the fulfillment in teaching such advanced learners:  
39  
40  
41  
42  
43  
44

45 It's gratifying to feel like you are teaching the next generation of docs as they  
46 come through and they are high level learners who are about to become  
47 intensivists themselves so they are keen to learn.  
48

49 **Barriers.** The main barriers to retention included career trajectory (as described above)  
50 and individual time constraints, including both personal and professional demands. As  
51 volunteer physicians continue along their career they may choose different pursuits (e.g.,  
52 research) and then do not have time to remain an ACES volunteer.  
53  
54  
55  
56  
57  
58  
59  
60

## Volunteer Exchange

**Career Opportunities.** We use volunteer exchange from the theory of social exchange which posits that social behavior is the result of an exchange process.<sup>28</sup> Volunteers noted that aside from receiving continuing medical education (CME) credit for their volunteerism, their participation in the ACES course provided additional benefits for their careers:

Being an ACES volunteer means that this is Royal College (RC) accredited and I think that speaks a lot to the quality of the course but also for an academic person who might have additional interests in teaching more RC courses, this work stands out quite a bit.

**Keeping Current.** Volunteering in the ACES course gave individuals the benefit of staying current at a national level. This knowledge acquisition and networking opportunity both enhanced an individual's practice personally and professionally.

It's a good group of people, so it's always a good time and it's a way to keep your finger on the pulse of how things are going nationally and talk to people about what is going on in other centers.

**Academic Currency.** The benefit of volunteering in the course was viewed by many individuals in terms of professional value whereby the experience counts towards promotion and tenure at an academic institution.

It's always something you can list in your own CV within our medical practice plan. Teaching at these things counts in terms of academic points, you can put down each year that you taught this and that has academic currency.

1  
2  
3  
4 Contributing to another's program was further described as a method of building up ones  
5  
6  
7  
8 currency in that there was an expectation that, in turn, volunteer peers would "pay back"  
9  
10  
11 the favor at a later date.

## 12 13 14 15 **Volunteer Recognition**

16  
17  
18 **Personal Recognition.** Attainment value, such that involvement of volunteers with the  
19  
20 program confirmed aspects of one's self "this is who I am," was further described in the  
21  
22 form of personal recognition of their role as educators, by colleagues at other universities,  
23  
24 across the country.

25  
26  
27 **Scholarly/Academic Work.** Volunteers want their work in the ACES program to be  
28  
29 recognized as scholarly contributions. The ACES program leadership sends letters of  
30  
31 recognition to volunteers' department heads, however, participants described difficulty in  
32  
33 getting universities to recognize ACES contributions as scholarly.  
34  
35

36  
37 I think ACES does a very good job at recognizing our contributions. They  
38 catalogue and document the contributions on an annual basis, they send letters to  
39 our Department heads so they recognize us. I think the greater impact is to have  
40 an opportunity to enhance this recognition as scholarly work, to meet the criteria  
41 for standard publication in a peer review outlet.  
42  
43

## 44 45 **Educator Network**

46  
47 **Common Vision.** Personal perceptions of the importance of the volunteer work coupled  
48  
49 with a common vision, passion for education and collaborative spirit was described by  
50  
51 participants. At the highest level the penultimate goal of potentially impacting patient  
52  
53 care as an outcome was described by both leaders and volunteers. The potential effect  
54  
55 on patient care (utility value) was further described as being achievable through the  
56  
57  
58  
59  
60

1  
2  
3 volunteers' abilities and opportunity to help the residents acquire the knowledge and  
4  
5  
6 skills required to excel in the clinical setting.  
7

8 I think we share a common vision, a common passion. We all believe in  
9 education, I think that through collaboration we can do greater things than we  
10 could independently. There's a sense of satisfaction of doing it.  
11

12 **Duration of Participation/Loyalty.** Participants expressed feelings of loyalty to other  
13  
14  
15 volunteers in the network, especially those who have been involved for a longer duration.  
16

17 I think there's always going to be some loyalty because you've invested a great  
18 period of time. Also, it is one of the few tangible creations that you've helped  
19 develop and so you feel part of it.  
20  
21

22 **Affect.** Deep and meaningful emotional components connecting volunteers to the ACES  
23  
24 program educator network were identified. Being part of a network elicited strong  
25  
26 positive emotions. The enjoyment experienced by volunteers was strongly linked to  
27  
28 interactions with other like-minded educators. The face-to-face interaction of volunteers  
29  
30 on an annual basis at varying Canadian locations was described as an essential part of the  
31  
32 organization.  
33  
34

35  
36  
37 When we meet it's like a bunch of friends getting together...everybody is full of  
38 energy when you arrive...everybody is happy, people are smiling...and you are  
39 basically like a big family...It's mostly, I think, emotional at that stage.  
40  
41

## 42 **Quasi Volunteerism**

43  
44 **Academic Pressure.** The terms Quasi volunteer is reflected in both extrinsic and  
45  
46 intrinsic motivations to extend effort into a relationship and/or activity. That is,  
47  
48 volunteers in academic teaching hospitals described 'academic pressures', especially for  
49  
50 younger doctors, where they felt they were required to meet specific academic  
51  
52 expectations:  
53  
54

55  
56 The premise that its volunteerism is somewhat true. Nobody has a gun to my  
57  
58  
59  
60

1  
2  
3 head saying I have to do it but we all have to do something, academically. So, I  
4 guess it's quasi-volunteerism. Like if I wasn't doing this I would have to,  
5 especially us younger docs, like we are all on some degree of academic pressure  
6 to keep the university happy. So, if I were not doing this teaching, I'd be doing  
7 something else, you know?  
8  
9

10 **Curriculum Vitae.** Intrinsically, participant volunteers used the teaching exposure at the  
11 national ACES course to grow their own CVs. As such, for some, the volunteer  
12 activities were not performed for purely altruistic reasons, but also for professional gain:  
13  
14

15  
16  
17 It's good to have in your career, you have to have exposure to teaching outside of  
18 your center so this gives me the opportunity to fulfill that, so it's not all altruistic.  
19 it's something that I do need to do for my curriculum vitae.  
20  
21  
22  
23  
24

## 25 **Discussion**

26  
27 The productivity, success, and sustainability of the ACES organization depends on the  
28 recruitment, retention and recognition of volunteers in a collaborative network. As  
29 depicted in our conceptual framework, the synergistic effects of the individual's  
30 emotional and cognitive engagement along with reciprocal engagement within the  
31 environmental context and culture of the organization, followed by a cue to action, leads  
32 to behavioural engagement in volunteer activities and contributions to the ACES  
33 program. Wherein the conceptual framework has underpinned and bounded the study, as  
34 described by Fredricks et al. (2004), we have also found that it is difficult to specifically  
35 separate out the behavioural, emotional and cognitive elements of engagement. We feel  
36 that our findings call for richer characterizations of how physicians behave, feel, and  
37 think.  
38  
39  
40  
41  
42  
43  
44  
45  
46  
47  
48  
49  
50  
51  
52  
53  
54  
55  
56  
57  
58  
59  
60



1  
2  
3 Overall, our study yields several key findings that contribute to our understanding of  
4 what motivates physicians to volunteer, and perhaps more importantly what sustains their  
5 volunteerism. With respect to recruitment, we found that word-of-mouth recruitment was  
6 the primary behavioural vehicle to engage new members. In the marketing literature,  
7 word-of-mouth is defined as an interpersonal communication, independent of the  
8 organization's marketing activities, about an organization or its products.<sup>29</sup> Our findings  
9 support this literature in that word-of-mouth is a dyadic communication between a source  
10 and a recipient.<sup>30</sup> This implies that the occurrence of word-of-mouth is determined by  
11 characteristics of the recipient, the characteristics of the source, and their mutual  
12 relationship.<sup>31,32</sup>

13  
14  
15  
16  
17  
18  
19  
20  
21  
22  
23  
24  
25  
26  
27  
28  
29 Word-of-mouth communication was found to be particularly effective behavioral  
30 component in securing buy-in from new members when done early in the recruitment  
31 phase. That is, a phone call from one of the long-standing members of ACES early in the  
32 selection phase was conducted so as to gain an initial impression of potential new  
33 members. This also tended to have the effect in attracting the potential recruit. This  
34 supports earlier research that demonstrated receiving positive information through word-  
35 of-mouth early in the recruitment process is positively related to perceived organizational  
36 attractiveness and actual recruitment.<sup>33</sup> Within the business literature, this phenomenon  
37 is called the accessibility-diagnostics model. The model suggests that information  
38 provided through word-of-mouth affects potential recruits' early evaluations of the  
39 organization because of its accessibility in memory and its feedback potential.<sup>34,35</sup> That  
40 is, if a physician receives positive word-of-mouth information on a given program or  
41  
42  
43  
44  
45  
46  
47  
48  
49  
50  
51  
52  
53  
54  
55  
56  
57  
58  
59  
60

1  
2  
3 organization they are more likely to think favourably when asked at a later date to  
4  
5 perform a volunteer activity. This finding has clear practical implications for practice in  
6  
7 that organizations should try to stimulate positive word-of-mouth early in the recruitment  
8  
9 process because of its positive impact on potential recruits' attraction to an organization  
10  
11 and subsequent retention.  
12  
13

14  
15  
16  
17 Long-standing ACES volunteers take careful measures to select, and subsequently recruit  
18  
19 new members. In turn, this recruitment effort has a significant impact on long-term  
20  
21 retention. The majority of physicians recruited become committed to the ACES program  
22  
23 and have long-term sustainability as volunteers. We have found that a key to this  
24  
25 commitment and sustainability lies in the strength of the social networks among volunteer  
26  
27 physicians. Research on teams in which dyads are found within larger groups of people  
28  
29 (e.g., ACES volunteer physicians within the larger medical community) suggests that  
30  
31 people are likely to collaborate with others who possess qualities and skills, and know-  
32  
33 how that are complementary to their own and relevant to reaching a particular objective.<sup>36</sup>  
34  
35 Interestingly, we found that many of the new recruits were already well known to at least  
36  
37 several of the ACES physician volunteers, and thus were already in their educator  
38  
39 network. This supports the notion that people are inclined to create relationships with  
40  
41 friends of their friends (or the business associates of their business associates). The effect  
42  
43 of sharing mutual acquaintances on attachment appears to be additive in that each  
44  
45 additional mutual acquaintance shared by an unconnected dyad (relationship) additionally  
46  
47 increased the likelihood that they will become acquainted.<sup>37</sup> Perhaps the reason for the  
48  
49 excellent retention and deep commitment of ACES physician volunteers is explained by  
50  
51  
52  
53  
54  
55  
56  
57  
58  
59  
60

1  
2  
3 the structure of the ACES social networks which comprises many third party  
4  
5 connections. Research states that ties connecting people who share several common third  
6  
7 party connections are more likely to withstand the test of time.<sup>38,39</sup> As related to our  
8  
9 conceptual framework, we understand that physician volunteers exercise both emotional  
10  
11 (intrinsic commitment & loyalty) and cognitive (intellectual challenge & constant  
12  
13 change/growth) engagement that directly relate to the retention of volunteers.<sup>40,41</sup>  
14  
15  
16  
17

18  
19  
20 Personal satisfaction was an overarching finding that mapped directly to the emotional  
21  
22 and cognitive elements of engagement within the conceptual framework. Our study has  
23  
24 shown that financial incentives are of low to absent value to physician volunteer  
25  
26 engagement in all activities within the ACES program. The emotional and cognitive  
27  
28 rewards coupled with reciprocal engagement were key elements. In addition, the  
29  
30 organizational culture provided the basis for successful engagement. The need to enhance  
31  
32 scholarly recognition was identified. Literature supports that the internal motivation is a  
33  
34 strong driver of volunteer teacher participation.<sup>9</sup> The high value placed on personal  
35  
36 satisfaction appears to be consistent across a variety of contexts. This domain of personal  
37  
38 satisfaction can be further broken down into the emotional, cognitive and reciprocal form  
39  
40 of engagement and mapped to our conceptual framework. In particular, physicians felt a  
41  
42 strong sense of cognitive engagement with regard to being 'pushed' out of their comfort  
43  
44 zone so as to reach a new and expanded state of performance.<sup>42,43</sup>  
45  
46  
47  
48  
49  
50

51  
52  
53 We found workload and increased external demands to be a threat to physician volunteer  
54  
55 activities. Yet, in the ACES group we identified healthcare professionals that have  
56  
57  
58  
59  
60

1  
2  
3 remained engaged despite considerable external demands. In fact, most volunteers  
4  
5 interviewed in this program would contribute further if called upon. The high level of  
6  
7 engagement of these individuals is complex and involves many elements of the  
8  
9 conceptual framework. In some circumstances, when other demands increased,  
10  
11 volunteers modified their role and mentored new leaders, allowing for ongoing  
12  
13 engagement. Moving away from traditional ‘individual’ leadership theories, team  
14  
15 leadership theory includes the concept of team leadership capacity, which includes the  
16  
17 entire range of the team’s leadership.<sup>44</sup> It appears that the ACES organizational structure  
18  
19 has capitalized on this distributed shared leadership approach to ensure sustainable and  
20  
21 diversity of available leaders.  
22  
23  
24  
25  
26  
27  
28

### 29 **Limitations**

30  
31 There are several limitations to our study. It was a cross-sectional study, performed in a  
32  
33 single context of highly engaged health care professionals most of whom were located at  
34  
35 academic teaching hospitals. The nature of engagement within the organization may be  
36  
37 context specific. Further studies are required to determine the transferability our findings  
38  
39 to other contexts. In our study, we sought perspectives from volunteers performing  
40  
41 various tasks. However, given the sample size it is not possible to determine if the  
42  
43 underlying components of engagement change with variation in the roles. Further, we  
44  
45 did not examine the time spent volunteering (e.g., hours/weeks per year) nor did we seek  
46  
47 out individuals who may have volunteered but later completely withdrew. We will  
48  
49 ensure to capture this data in our future work. Finally, when the volunteer role includes  
50  
51 teaching, we identified that the reciprocal engagement between the student and teacher  
52  
53  
54  
55  
56  
57  
58  
59  
60

1  
2  
3 adds to the overall engagement of the volunteer. This component was not in our  
4  
5 conceptual framework and could be added in future investigations where the volunteer  
6  
7 role includes teaching.  
8  
9

### 10 11 12 **Future Research**

13  
14  
15 The presumption that engagement is malleable is an exciting prospect.<sup>45,46</sup> A cohesive  
16  
17 framework is required to facilitate understanding of the complex construct of volunteer  
18  
19 physician engagement and this framework can be utilized in the development of  
20  
21 multifaceted approaches to enhance volunteer physician engagement. For example, an  
22  
23 intervention may include enhancing reciprocal engagement through collaborative  
24  
25 meetings and enhancing interpersonal relationships; emotional engagement by connecting  
26  
27 with individuals on a deeper level with respect to the meaning and potential outcomes of  
28  
29 their work; cognitive engagement by including intellectually challenging tasks, and  
30  
31 recognition of the volunteers work through faculty appointment, newsletters among their  
32  
33 peers, awards and scholarly acknowledgement. Further research is also required to  
34  
35 determine how we measure engagement. The conceptual framework presented in this  
36  
37 paper may aid in the design of measurement tools. The strategies and tools may vary  
38  
39 depending on type of volunteer activity and setting. Furthermore, research is required to  
40  
41 explore the construct of disengagement, to determine if different professional “identities,”  
42  
43 such as nurses, respiratory therapists, administrators, have different facilitators and  
44  
45 inhibitors to engagement. Future studies may also explore if volunteer participation  
46  
47 impacts an individuals’ clinical practice or career path.  
48  
49  
50  
51  
52  
53  
54  
55  
56  
57  
58  
59  
60

## Conclusion

Volunteer physicians are essential to the growth and sustainability of the ACES program.

This organization has demonstrated great success with engaging highly effective volunteers. Our conceptual framework and qualitative findings provide a preliminary framework as an important initial step in understanding the complex construct of volunteer physician engagement. This study will guide us in our development of a multifaceted intervention, aligned with the conceptual framework, to enhance volunteer physician engagement within the organization. Finally, given the current economic climate, providing compensation to physicians for additional education related activities may not be financially feasible or sustainable so alternative approaches must be explored to engage volunteer physicians.

1  
2  
3  
4 **Contributors:** Dr. Sarti and Dr. Sutherland had full access to all the data in the study  
5 and take responsibility for the integrity of the data and the accuracy of the data analysis.  
6 Study concept and design: Sarti, Sutherland, Landriault, DesRosier, Brien, Cardinal  
7 Acquisition of data: Sarti, Sutherland, Landriault, DesRosier  
8 Analysis and interpretation of data: Sarti, Sutherland, Landriault, Cardinal  
9 Drafting of the manuscript: Sarti and Sutherland  
10 Critical revision of the manuscript for important intellectual content: Sarti, Sutherland,  
11 Landriault, DesRosier, Brien, Cardinal  
12 Obtained funding: Landriault, Brien, Cardinal  
13 Administrative, technical, or material support: Landriault, DesRosier  
14 Study supervision: Sarti, Sutherland, Cardinal  
15 All authors have approved the final version of this manuscript.  
16  
17  
18  
19

20 **Acknowledgements:** We would like to thank the healthcare professionals who  
21 participated in this study and shared their experiences and opinions with the research  
22 team.  
23

24 **Funding/Support:** Resources and secretariat support for this project were provided by  
25 the Royal College  
26  
27

28 **Competing interest:** None.  
29

30 **Ethics approval:** This study was granted an official exemption by the Chair of The  
31 Ottawa Hospital Research Ethics Board  
32  
33

34 **Disclaimer:** None  
35

36 **Previous Presentations:** None  
37  
38  
39  
40  
41  
42  
43  
44  
45  
46  
47  
48  
49  
50  
51  
52  
53  
54  
55  
56  
57  
58  
59  
60

**REFERENCES:**

1. Taitz JM, Lee TH, Sequist TD. A framework for engaging physicians in quality and safety. *BMJ Quality & Safety*. 2012;21(9):722–728.
2. Volunteering. *Wikipedia, the free encyclopedia*. 2015. Available at: <http://en.wikipedia.org/wiki/Volunteering>. Accessed October 1, 2014.
3. *The American Heritage College Dictionary* (4<sup>th</sup> ed.). Houghton Mifflin Company; 2010.
4. Gruen RL, Campbell EG, Blumenthal D. Public roles of US physicians: community participation, political involvement, and collective advocacy. *JAMA*. 2006;296(20):2467–2475.
5. Grande D, Armstrong K. Community volunteerism of US physicians. *J Gen Intern Med*. 2008;23(12):1987–1991.
6. Milliken AD. Physician engagement: a necessary but reciprocal process. *Canadian Medical Association Journal*. 2014;186(4):244–245.
7. Snell AJ, Briscoe D, Dickson G. From the inside out: the engagement of physicians as leaders in health care settings. *Qual Health Res*. 2011;21(7):952–967.
8. Mazurenko O, Hearld LR. Environmental factors associated with physician's engagement in communication activities. *Health Care Manage Rev*. 2014:1.
9. Kumar A, Kallen DJ, Mathew T. Volunteer faculty: what rewards or incentives do they prefer? *Teach Learn Med*. 2002;14(2):119–123.
10. Vath BE. Volunteer physician faculty and the changing face of medicine. *Western Journal of Medicine*. 2001;174(4):242–246.
11. Fredricks JA, Blumenfeld PC. School engagement: Potential of the concept, state of the evidence. *Review of Educational Research*. 2004;74(1):59–109.



- 1  
2  
3 12. Anderson JL, Adams CD, Antman EM, et al. ACC/AHA 2007 guidelines for the  
4 management of patients with unstable angina/non-ST-Elevation myocardial infarction: a  
5 report of the American College of Cardiology/American Heart Association Task Force on  
6 Practice Guidelines (Writing Committee to Revise the 2002 Guidelines for the Management  
7 of Patients With Unstable Angina/Non-ST-Elevation Myocardial Infarction) developed in  
8 collaboration with the American College of Emergency Physicians, the Society for  
9 Cardiovascular Angiography and Interventions, and the Society of Thoracic Surgeons  
10 endorsed by the American Association of Cardiovascular and Pulmonary Rehabilitation and  
11 the Society for Academic Emergency Medicine. *J Am Coll Cardiol.* 2007;50(7):e1–e157.  
12  
13  
14  
15  
16  
17  
18  
19  
20  
21  
22 13. Adams HP, del Zoppo G, Alberts MJ, et al. Guidelines for the early management of adults  
23 with ischemic stroke: a guideline from the American Heart Association/American Stroke  
24 Association Stroke Council, Clinical Cardiology Council, Cardiovascular Radiology and  
25 Intervention Council, and the Atherosclerotic Peripheral Vascular Disease and Quality of  
26 Care Outcomes in Research Interdisciplinary Working Groups: the American Academy of  
27 Neurology affirms the value of this guideline as an educational tool for neurologists. *Stroke.*  
28 2007;38(5):1655–1711.  
29  
30  
31  
32  
33  
34  
35  
36  
37 14. Dellinger RP, Levy MM, Carlet JM, et al. Surviving Sepsis Campaign: international  
38 guidelines for management of severe sepsis and septic shock: 2008. In: Vol 36. 2008:296–  
39 327.  
40  
41  
42  
43  
44 15. Rivers E, Nguyen B, Havstad S, et al. Early goal-directed therapy in the treatment of severe  
45 sepsis and septic shock. *N Engl J Med.* 2001;345(19):1368–1377.  
46  
47  
48  
49 16. Rivers EP, Coba V, Whitmill M. Early goal-directed therapy in severe sepsis and septic  
50 shock: a contemporary review of the literature. *Curr Opin Anaesthesiol.* 2008;21(2):128–  
51 140.  
52  
53  
54  
55  
56 17. Singer, M., Deutschman, C. S., Seymour, C. W., et al. The Third International Consensus  
57 Definitions for Sepsis and Septic Shock (Sepsis-3). *JAMA : the Journal of the American*  
58  
59  
60

- 1  
2  
3 Medical Association, 2016;315(8), 801–810.  
4  
5  
6 18. Patton MQ. *Qualitative Research & Evaluation Methods*. SAGE Publications; 2014.  
7  
8  
9 19. Miles MB, Huberman AM, Saldaña J. *Qualitative Data Analysis*. SAGE Publications,  
10 Incorporated; 2013.  
11  
12  
13  
14 20. Swanwick, T. (Ed.). *Understanding Medical Education*. Oxford, UK: John Wiley & Sons,  
15 Ltd; 2013.  
16  
17  
18  
19 21. Wenger, E. (1999). *Communities of Practice*. Cambridge University Press.  
20  
21  
22 22. Preskill H, Torres RT. *Evaluative Inquiry for Learning in Organizations*. Thousand Oaks,  
23 CA: SAGE; 1999.  
24  
25  
26  
27 23. Creswell JW. *Educational Research: Planning, Conducting, and Evaluating Quantitative  
28 and Qualitative Research*. Boston, MA: Pearson; 2012.  
29  
30  
31  
32 24. Creswell JW, Hanson WE, Plano VLC, Morales A. Qualitative Research Designs Selection  
33 and Implementation. *The Counseling Psychologist*. 2007;35(2):236–264.  
34  
35  
36  
37 25. Hennink M, Hutter I, Bailey A. *Qualitative Research Methods*. SAGE; 2010.  
38  
39  
40 26. Viera AJ, Garrett JM. Understanding interobserver agreement: the kappa statistic. *Fam Med*.  
41 2005;37(5):360–363.  
42  
43  
44  
45 27. Cama R. *Evidence-Based Healthcare Design*. Hoboken, NJ: John Wiley & Sons, Inc.; 2009.  
46  
47  
48 28. Emerson, RM (1987). Toward a theory of value in social exchange. *Social exchange  
49 theory*, 11, 46.  
50  
51  
52  
53 29. Bone PF. Word-of-mouth effects on short-term and long-term product judgments. *Journal of  
54 Business Research*. 1995;32(3):213–223.  
55  
56  
57  
58  
59  
60

- 1  
2  
3 30. Gilly MC, Graham JL, Wolfinbarger MF, Yale LJ. A Dyadic Study of Interpersonal  
4 Information Search. *Journal of the Academy of Marketing Science*. 1998;26(2):83–100.  
5  
6  
7  
8 31. Bansal HS, Voyer PA. Word-of-Mouth Processes within a Services Purchase Decision  
9 Context. *Journal of Service Research*. 2000;3(2):166–177.  
10  
11  
12  
13 32. Lau GT, Ng S. Individual and Situational Factors Influencing Negative Word-of-Mouth  
14 Behaviour. *Canadian Journal of Administrative Sciences / Revue Canadienne des Sciences*  
15 *de l'Administration*. 2001;18(3):163–178.  
16  
17  
18  
19  
20  
21 33. Van Hove G, Lievens F. Tapping the grapevine: a closer look at word-of-mouth as a  
22 recruitment source. *J Appl Psychol*. 2009;94(2):341–352.  
23  
24  
25  
26 34. Feldman JM, Lynch JG. Self-generated validity and other effects of measurement on belief,  
27 attitude, intention, and behavior. *Journal of Applied Psychology*. 1988;73(3):421–435.  
28  
29  
30  
31 35. Herr PM, Kardes FR, Kim J. Effects of Word-of-Mouth and Product-Attribute Information  
32 on Persuasion: An Accessibility-Diagnosticity Perspective. *Journal of Consumer Research*.  
33 1991;17(4):454.  
34  
35  
36  
37  
38 36. Rivera MT, Soderstrom SB, Uzzi B. Dynamics of Dyads in  
39 Social Networks: Assortative, Relational, and Proximity Mechanisms. *Annu Rev Sociol*.  
40 2010;36:91–115.  
41  
42  
43  
44  
45 37. Newman ME. Clustering and preferential attachment in growing networks. *Phys Rev E Stat*  
46 *Nonlin Soft Matter Phys*. 2001;64(2 Pt 2):025102.  
47  
48  
49  
50 38. Burt RS. Decay functions. *Social Networks*. 2000;22(1):1–28.  
51  
52  
53 39. Martin JL, Yeung K-T. Persistence of close personal ties over a 12-year period. *Social*  
54 *Networks*. 2006;28(4):331–362.  
55  
56  
57  
58  
59  
60

- 1  
2  
3  
4  
5  
6  
7  
8  
9  
10  
11  
12  
13  
14  
15  
16  
17  
18  
19  
20  
21  
22  
23  
24  
25  
26  
27  
28  
29  
30  
31  
32  
33  
34  
35  
36  
37  
38  
39  
40  
41  
42  
43  
44  
45  
46  
47  
48  
49  
50  
51  
52  
53  
54  
55  
56  
57  
58  
59  
60
40. Deci., E., & Ryan, M. *Intrinsic motivation and self-determination in human behavior*. New York, NY: Plenum; 1985.
41. Deci., E., & Ryan, M. The support of autonomy and control of behavior. *Journal of Personality and Social Psychology*. 1987;53:1024-1037.
42. White, A. *Continuous Quality Improvement*. London, UK: Piatkus Books; 1996.
43. Yerkes, R., & Dodson, J. The Dancing Mouse: A study in animal behavior. *Journal of Comparative Neurology & Psychology*. 1907; 18, pp.459-482.
44. Northouse PG. *Leadership*. SAGE Publications; 2012.
45. Coates H. The value of student engagement for higher education quality assurance. *Quality in Higher Education*. 2005;11(1):25–36.
46. Parsons J, Taylor L. *Student engagement: What do we know and what should we do?* 2011. Available at:  
[https://education.alberta.ca/media/6459431/student\\_engagement\\_literature\\_review\\_2011](https://education.alberta.ca/media/6459431/student_engagement_literature_review_2011). Accessed October 10, 2014.

1  
2  
3  
4  
5  
6  
7  
8  
9  
10  
11  
12  
13  
14  
15  
16  
17  
18  
19  
20  
21  
22  
23  
24  
25  
26  
27  
28  
29  
30  
31  
32  
33  
34  
35  
36  
37  
38  
39  
40  
41  
42  
43  
44  
45  
46  
47  
48  
49  
50  
51  
52  
53  
54  
55  
56  
57  
58  
59  
60

**List of Figures:**

Figure 1. Conceptual Framework

For peer review only

1  
2  
3 **List of Tables:**  
4

5  
6 Table 1. Characteristics of interview participants.  
7

8 Table 2. Summary of the qualitative findings.  
9  
10  
11  
12  
13  
14  
15  
16  
17  
18  
19  
20  
21  
22  
23  
24  
25  
26  
27  
28  
29  
30  
31  
32  
33  
34  
35  
36  
37  
38  
39  
40  
41  
42  
43  
44  
45  
46  
47  
48  
49  
50  
51  
52  
53  
54  
55  
56  
57  
58  
59  
60

For peer review only

1  
2  
3  
4  
5  
6  
7  
8  
9  
10  
11  
12  
13  
14  
15  
16  
17  
18  
19  
20  
21  
22  
23  
24  
25  
26  
27  
28  
29  
30  
31  
32  
33  
34  
35  
36  
37  
38  
39  
40  
41  
42  
43  
44  
45  
46  
47  
48  
49  
50  
51  
52  
53  
54  
55  
56  
57  
58  
59  
60

**List of Supplemental Online Content**

Appendix S1. Interview Guides.

For peer review only

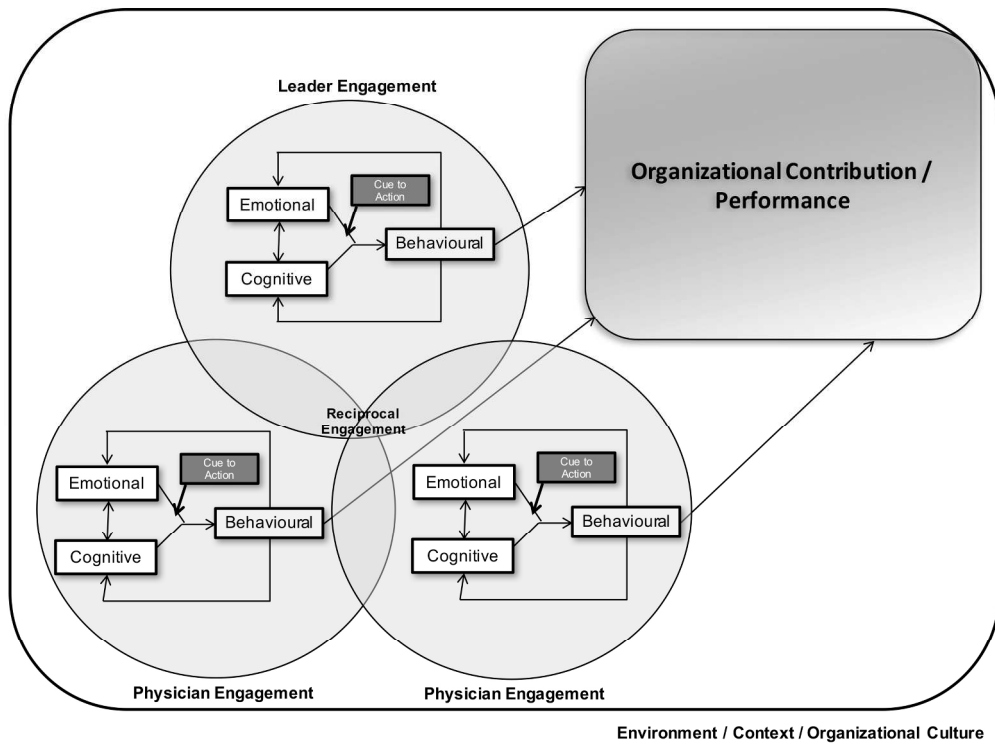

Figure 1. Conceptual Framework

215x161mm (300 x 300 DPI)

ew only

1  
2  
3  
4  
5  
6  
7  
8  
9  
10  
11  
12  
13  
14  
15  
16  
17  
18  
19  
20  
21  
22  
23  
24  
25  
26  
27  
28  
29  
30  
31  
32  
33  
34  
35  
36  
37  
38  
39  
40  
41  
42  
43  
44  
45  
46  
47  
48  
49  
50  
51  
52  
53  
54  
55  
56  
57  
58  
59  
60



1  
2  
3  
4  
5  
6  
7  
8  
9  
10  
11  
12  
13  
14  
15  
16  
17  
18  
19  
20  
21  
22  
23  
24  
25  
26  
27  
28  
29  
30  
31  
32  
33  
34  
35  
36  
37  
38  
39  
40  
41  
42  
43  
44  
45  
46  
47  
48  
49  
50  
51  
52  
53  
54  
55  
56  
57  
58  
59  
60

**Table 1. Characteristics of interview participants.**

| Characteristic          | n  | %  |
|-------------------------|----|----|
| Number                  | 30 |    |
| Region *                |    |    |
| Mountain                | 7  | 23 |
| Prairies                | 3  | 10 |
| Ontario                 | 14 | 47 |
| Quebec                  | 2  | 7  |
| Atlantic                | 4  | 13 |
| Specialty/Discipline ** |    |    |
| Critical Care           | 23 | 77 |
| Anesthesia              | 7  | 23 |
| Internal Medicine       | 5  | 17 |
| Surgery                 | 3  | 10 |
| Family Medicine         | 3  | 10 |
| Nurses                  | 2  | 7  |
| Respiratory Therapists  | 2  | 7  |
| Pediatric Critical Care | 1  | 3  |

\* The regions of Canada have been divided in the following way: Mountain includes British Columbia and Alberta; Prairies include Saskatchewan and Manitoba; Atlantic includes all Atlantic Provinces.

\*\* Individuals were classified under their current practice specialties. Note that an individual may be practicing in more than one specialty.

Table 1. Characteristics of interview participants.

279x361mm (300 x 300 DPI)

Table 2: Summary of the qualitative findings.

|                                            |
|--------------------------------------------|
| <b>1. Volunteer Recruitment</b>            |
| a. Word of mouth                           |
| b. Snowball approach                       |
| c. Career stage                            |
| <b>2. Volunteer Retention</b>              |
| a. Distributed leadership and career paths |
| b. Program change and evolution/innovation |
| c. Comfort zone                            |
| d. Reciprocal engagement                   |
| e. Intrinsic motivation                    |
| f. Learners                                |
| g. Barriers                                |
| <b>3. Volunteer Exchange</b>               |
| a. Career opportunities                    |
| b. Keep current                            |
| c. Academic currency                       |
| <b>4. Volunteer Recognition</b>            |
| a. Personal recognition                    |
| b. Scholarly/academic work                 |
| <b>5. Educator Network</b>                 |
| a. Common vision                           |
| b. Duration or participation/loyalty       |
| c. Affect                                  |
| <b>6. Quasi Volunteerism</b>               |
| a. Academic pressure                       |
| b. Curriculum vitae                        |

Table 2. Summary of the qualitative findings.

279x361mm (300 x 300 DPI)

## Interview Guide 1

### Introduction

#### 1. Introduction

Thanks for agreeing to participate ... We are conducting a needs assessment for the ACES course (introduce the project). Consent.

#### 2. Background

a. Goal of the ACES course - provide the learner with the necessary knowledge, skills and attitude to recognize and manage a patient who is acutely and critically ill in the first hour of presentation

b. Modality of the ACES course - multimodal: e-learning, book, case seminars, technical skill workshop, simulation, and bedside tools

#### 3. Purpose of the needs assessment

a. Interest expressed by various groups to customize the ACES course to a specific population

b. Facilitate the dissemination of the course across Canada

c. Exploring interest in an interprofessional course

d. Explore business models that would facilitate dissemination

e. Explore peer-review process and means of promoting academic contributions of faculty

#### 4. Please let us know if you are NOT in a position to answer some of the questions (e.g. vice-dean discussing weaknesses of residents during resuscitation)

#### 5. Interview will be recorded; all information will be kept confidential

### Demographics

1. What is your professional designation?

2. What are your current roles?

3. Can you let me know what type of institution you work in (Community Hospital, Secondary, Tertiary, and Quaternary)?

4. When it comes to responding to a crisis, what is the usual makeup of the team in your institution?

5. Are you familiar with the ACES course? Have you participated or taught an ACES course?

### Content

1. When it comes to responding to a crisis, what are the team's strengths?

2. When it comes to responding to a crisis, what are team's weaknesses?

#### 3. Probes

a. What about (mention any members of the team that have not been addressed)

- 1
  - 2
  - 3
  - 4
  - 5
  - 6
  - 7
  - 8
  - 9
  - 10
  - 11
  - 12
  - 13
  - 14
  - 15
  - 16
  - 17
  - 18
  - 19
  - 20
  - 21
  - 22
  - 23
  - 24
  - 25
  - 26
  - 27
  - 28
  - 29
  - 30
  - 31
  - 32
  - 33
  - 34
  - 35
  - 36
  - 37
  - 38
  - 39
  - 40
  - 41
  - 42
  - 43
  - 44
  - 45
  - 46
  - 47
  - 48
  - 49
  - 50
  - 51
  - 52
  - 53
  - 54
  - 55
  - 56
  - 57
  - 58
  - 59
  - 60
4. At the end of the course, the learner should be able to..... (Please list the 5 most important performance objectives)
  5. Is there anything else that you can think of that we have not discussed?

### Course format

1. Do you think that pre-course on-line content would be useful?
  - a. Do you anticipate that you or your learners may have any problems accessing online material?
  - b. What is the purpose of having pre-course on-line content?
    - i. Teaching knowledge, decision-making, other?
    - ii. Preparation for the face-to-face course
    - iii. Assessment of learners?
    - iv. Others
  - c. What should be the duration of a pre-course on-line session?
  - d. Should the pre-course on-line content be mandatory?
    - i. If so, can you think of ways to ensure your or your learners compliance with mandatory online content?
2. Do you think that post-course on-line content would be useful?
  - a. Would it be useful for you to have access to the pre-course on-line content after the course for further revision? How long?
  - b. What is the purpose of having post-course on-line content?
    - i. Teaching knowledge, decision-making, other?
    - ii. Preparation for the face-to-face course
    - iii. Assessment of learners?
    - iv. Post-course assessment of knowledge retention
    - v. Others
  - c. What should be the duration of an on-line session?
    - i. Post face-to-face course
  - d. Should post-course on-line content be mandatory?
    - i. If so, can you think of ways to ensure your or your learners compliance with mandatory online content?
3. Do you think that the program should have a face-to-face course?
  - a. How long should the course be?
  - b. What should be the preferred modalities?
    - a. Simulation?
    - b. Case-based seminars?
    - c. Technical skills workshops?
    - d. Didactic lecture?

- 1
  - 2
  - 3
  - 4
  - 5
  - 6
  - 7
  - 8
  - 9
  - 10
  - 11
  - 12
  - 13
  - 14
  - 15
  - 16
  - 17
  - 18
  - 19
  - 20
  - 21
  - 22
  - 23
  - 24
  - 25
  - 26
  - 27
  - 28
  - 29
  - 30
  - 31
  - 32
  - 33
  - 34
  - 35
  - 36
  - 37
  - 38
  - 39
  - 40
  - 41
  - 42
  - 43
  - 44
  - 45
  - 46
  - 47
  - 48
  - 49
  - 50
  - 51
  - 52
  - 53
  - 54
  - 55
  - 56
  - 57
  - 58
  - 59
  - 60
- e. Other?
  - c. What should be the relative proportion of time spent for each modality?
    - a. Simulation?
    - b. Case-based seminars?
    - c. Technical skills workshops?
    - d. Didactic lecture?
    - e. Other?
  - d. Should the pre-course material be reviewed during the face-to-face course?
  - e. What should determine the instructor to participant ratio?
    - a. Simulation?
    - b. Case-based seminars?
    - c. Technical skills workshops?
    - d. Didactic lecture?
    - e. Other?
  - f. Tell me what you think about making this course interprofessional...
    - a. What would be the advantages?
    - b. What would be the challenges?
4. How complicated is it for your institution/organization to organize a course that contains a large components of simulation training?
- a. Do you have access to simulation laboratory with the required equipment?
  - b. Do you have access to simulation engineer
  - c. Do you have trained instructors
  - d. Do you have course co-coordinators with experience delivering such courses

### Market analysis

1. What do you like most about the ACES course?
2. What changes would most improve the ACES course?
3. Do you know of competing courses currently available?
4. What do you like the most about these other courses?
5. What changes would most improve these other courses?
6. If you are not likely to deliver the ACES course, why not?
7. What would make you more likely to deliver the ACES course?
  - a. Is costing an issue?
  - b. Are difficulties delivering the ACES course an issue?
    - i. Low participants to instructor ratio
    - ii. Space
    - iii. Equipment

- 1  
2  
3  
4  
5  
6  
7  
8  
9  
10  
11
- iv. Personnel (simulation engineer, trained actors, course coordinator)
8. Imagine that you are tasked to widely disseminate this course in order to improve patient care. Can you think of a business model that would favor wide dissemination?
- a. Keeping in mind that there is a cost related to the development and dissemination of the material.

### 12 Peer review process

- 13  
14  
15  
16  
17  
18  
19
1. Do you have any suggestions on how to best organize and facilitate the peer-review process?
    - a. Initially
    - b. On an ongoing process

### 20 Recognition

- 21  
22  
23  
24  
25  
26  
27  
28  
29  
30  
31  
32  
33  
34  
35  
36  
37  
38  
39  
40  
41  
42  
43  
44  
45  
46  
47  
48  
49  
50  
51  
52  
53  
54  
55  
56  
57  
58  
59  
60
1. How could the Royal College best recognize your or your institution's contributions in the creation and delivery of the ACES course?
    - a. Would it help if creators were informed of their material evaluations and extent of dissemination? How often?
    - b. Would including the sums invested in the completion of the project be useful as a means of recognition?

## Interview Guide 2

### Volunteer Engagement in the ACES program

- Target – Leadership within the organization and some Volunteer Physicians
- Introduction, Confidentiality, Consent

### Leadership Questions:

1. What is your role in the ACES program?
2. How do volunteers impact the program? Has this changed over the years / history of the program?
3. Who are the volunteers?
4. Where are they located?
5. What roles do volunteers perform?
  - a. *Probe – development, delivery, administration, promotion of the program, etc. Specifically link to the conceptual framework*
6. Are there more ways that you envision them being involved?
7. Why do you think physicians volunteer their time with the ACES program?
  - a. *Probes: To be completed -*
    - i. *Behavioural*
    - ii. *Emotional*
    - iii. *Cognitive*
      1. *The challenge of the activity? Or mastering challenging / difficult ideas/skills/tasks?*
8. How are they currently recruited?
9. What are the barriers to recruitment and retention of volunteers?
10. What are the facilitators to recruitment and retention of volunteers?
11. How are they rewarded/appreciated for their contribution?
12. How do you see the ACES program evolving and how will this impact the volunteers? Impact the need for volunteers?
13. If a need for more volunteers is identified - Any solutions to increasing capacity and retention?

### Questions regarding your volunteer involvement

14. Do you volunteer time with the ACES program?
15. What activities / role do you perform as a volunteer?
16. Why do you volunteer?
17. How is your contribution acknowledged?

**Volunteer Questions:**

1. What is your role in the ACES program?
2. How long have you been a volunteer with ACES?
3. How did you become involved with ACES?
4. Why do you volunteer?
  - a. *Probes:*
    - i. *Behavioural*
    - ii. *Emotional*
    - iii. *Cognitive*
      1. *Do find this work challenging? by the activity and or your involvement? Or mastering challenging / difficult ideas/skills/tasks?*
  - b. What specifically – ie, what part is challenging? What part do you ‘love’? what part are you most ‘interested’ in?
5. Have you ever considered increasing your involvement with ACES?
6. Have you ever considered decreasing or discontinuing your involvement with ACES?
7. Are there factors that maintain your involvement with ACES?
8. What improvements could be made to better meet your needs as a volunteer with the organization?



**COREQ Checklist for Qualitative Study.**

## Domain 1: Research team and reflexivity

## Personal Characteristics

## 1. Interviewer/facilitator - Which author/s conducted the interview or focus group? (P.10)

- A.S., S.S., A.L.

## 2. Credentials - What were the researcher's credentials? (P.1)

- A.S.: MD, MEd
- S.S.: PhD
- A.L.: RN, BScN.

## 3. Occupation - What was their occupation at the time of the study? (P.1)

- A.S. – Intensivist / Clinical Scholar, The Ottawa Hospital; Clinician Investigator in the Clinical Epidemiology Program (CEP) at the Ottawa Hospital Research Institute (OHRI)
- S.S. Research consultant for The Department of Critical Care, The Ottawa Hospital
- A.L. – Instructional/Curriculum Designer at the Royal College of Physicians and Surgeons of Canada; practicing Critical Care nurse in a tertiary Intensive Care Unit

## 4. Gender - Was the researcher male or female? (P.1)

- All researchers (data collection, coding/data analysis) were female

## 5. Experience and training - What experience or training did the researcher have? (P.27)

- A.S. was in her second year of a clinical scholars' program. She completed a fellowship with the Academy for Innovation in Medical Education at the University of Ottawa, and was a Masters of Health Professionals Education Candidate, University of Dundee, Scotland. She had performed numerous qualitative and mixed method investigations.
- S.S. has expertise in mixed methods research with an MA (Hons.) in measurement and evaluation, and a PhD in educational research, with 20 years of research and evaluation experience.
- A.L. has gained experience in conducting needs assessment (using interviews, focus groups and walkthrough) for the development of educational material as part of her occupation and was in the process of completing her Masters of Education (MA Ed) which included graduate level courses in qualitative methods. She had also received training in interviewing skills.
- Co-authors experienced in both quantitative and qualitative research, medical education, palliative and critical care.

## Relationship with participants

1  
2  
3 6. Relationship established - Was a relationship established prior to study commencement? (P. 10)

- 4  
5  
6
- No.

7  
8 7. Participant knowledge of the interviewer - What did the participants know about the researcher?  
9 (P.10)

10  
11 Participants were aware of the rationale for the study and the researcher's level of training. 8.

12 Interviewer characteristics - What characteristics were reported about the interviewer/facilitator? (P.27)

- 13  
14
- The interviewer's level of training and occupation were reported (see Contributors section).

15  
16  
17 Domain 2: Study design (P.7)

18  
19 Pre-structured qualitative research design

20  
21 9. Methodological orientation and Theory - What methodological orientation was stated to underpin the  
22 study? (P.7)

- 23  
24
- Qualitative study guided by a conceptual framework.

25  
26  
27 Participant selection

28  
29 10. Sampling - How were participants selected? (p.9)

- 30  
31
- Purposive sampling.

32  
33 11. Method of approach - How were participants approached? (P.9)

- 34  
35
- Email and telephone.

36  
37 12. Sample size - How many participants were in the study? (P.11)

- 38  
39
- 30 interviews

40  
41 13. Non-participation- How many people refused to participate or dropped out? Reasons? (P.11)

- 42  
43
- Participation and non-participation rates provided (30 of 33 individuals participated). It can be noted that due to external time demands, 3 of the potential participants could not be interviewed during our data collection time window.

44  
45  
46  
47  
48  
49 Setting

50  
51 14. Setting of data collection - Where was the data collected? (P.10)

- 52  
53
- Telephone interviews

54  
55 15. Presence of non-participants Was anyone else present besides the participants and researchers?  
56  
57  
58  
59  
60

- No

16. Description of sample - What are the important characteristics of the sample? (P. 11 & 12)

- Secondary qualitative analysis was undertaken on fifteen semi-structured interviews with participants, including program directors and health care professionals across Canada. An additional fifteen interviews with physician volunteers were conducted to achieve thematic saturation. Important sample characteristics included health care provider role and geographic location.

Data collection

17. Interview guide - Were questions, prompts, guides provided by the authors? Was it pilot tested? (Appendix S1), and P. 10

- Semi structured guides were developed for the focus groups, interviews, and walkthroughs, with probes to guide as necessary. All tools were pilot tested prior to use in this study.

18. Repeat interviews - Were repeat interviews carried out?

- No.

19. Audio/visual recording - Did the research use audio or visual recording to collect the data? (P. 10)

- Interviews were audio recorded and transcribed.

20. Field notes - Were field notes made during and/or after the interview or focus group? (P. 10)

- Yes, both during and after.

21. Duration - What was the duration of the interviews or focus group? (P. 10)

- Interviews lasted from 40 to 60 minutes.

22. Data saturation - Was data saturation discussed? (P. 11)

- Yes

23. Transcripts returned - Were transcripts returned to participants for comment and/or correction?

- No, the transcripts were not returned to the participants. To ensure accuracy of transcriptions, each transcript was verified with the audio recordings prior to data analysis.

Domain 3: Analysis and findings

Data analysis

24. Number of data coders - How many data coders coded the data? (P. 10)

- Three researchers coded the data

25. Description of the coding tree - Did authors provide a description of the coding tree? (P. 10)

- No. Available upon request but we did mention the creation of it in the manuscript.

26. Derivation of themes - Were themes identified in advance or derived from the data? (P. 10)

- Inductive – Themes were derived from the data

27. Software - What software, if applicable, was used to manage the data? (P. 10)

- Yes, NVIVO

28. Participant checking - Did participants provide feedback on the findings? (P. 11)

- No

#### Reporting

29. Quotations presented - Were participant quotations presented to illustrate the themes / findings? Was each quotation identified? (P. 13,14,15,16,17,18 & 19)

- Yes, participant quotations were presented to illustrate the themes presented. No, each quotation was not identified so as to maintain assurances of confidentiality and anonymity.

30. Data and findings consistent - Was there consistency between the data presented and the findings? (P. 12)

- Yes, the quotes explicate the themes as presented.

31. Clarity of major themes - Were major themes clearly presented in the findings? (P. 13)

- Yes, the major themes are presented throughout the results section with representative quotes.

32. Clarity of minor themes - Is there a description of diverse cases or discussion of minor themes? (P. 12)

- Yes, we have provided the name of the main theme along with the associated sub themes, and have explicated these within the results section.
